# Supplementary material
Source: publisher site journal article supplement (https://www.spandidos-publications.com/6435/downloadSupplementary)
Supplement: Supplementary file 1 [file downloadSupplementary]

## Sheet: Table S1
Table SI. Comparison of gene expression levels between CMT93 and CMT93-PM.
Probe Set ID	FC ([Meta] vs [Normal])	Log FC ([Meta] vs [Normal])	FC (abs) ([Meta] vs [Normal])	Regulation ([Meta] vs [Normal])	[Meta](raw)	[Normal](raw)	[Meta](normalized)	[Normal](normalized)	Gene Symbol	Entrez Gene	Gene Ontology Biological Process	Gene Ontology Cellular Component	Gene Ontology Molecular Function	Alignments	AGI	Annotation Date	Annotation Description	Annotation Notes	Annotation Transcript Cluster	Archival UniGene Cluster	Chromosomal Location	Chromosome End Index(Avadis)	Chromosome Number(Avadis)	Chromosome Percentage Identity(Avadis)	Chromosome Start Index(Avadis)	Chromosome Strand(Avadis)	EC	Ensembl	FlyBase	Gene Title	GeneChip Array	Genome Version	GO(Avadis)	InterPro	MGI Name	OMIM	Pathway	QTL	RefSeq Protein ID	RefSeq Transcript ID	Representative Public ID	RGD Name	Sequence Source	Sequence Type	SGD accession number	Species Scientific Name	SwissProt	Target Description	Trans Membrane
1415971_at	-22.5353	-4.49412	22.5353	down	7.56699	170.525	-2.24706	2.24706	Marcks	17118		0005737 // cytoplasm // inferred from direct assay///0005737 // cytoplasm // not recorded///0005813 // centrosome // inferred from direct assay///0005856 // cytoskeleton // inferred from electronic annotation///0005938 // cell cortex // inferred from direct assay///0016020 // membrane // inferred from direct assay///0042585 // germinal vesicle // inferred from direct assay	0003779 // actin binding // inferred from electronic annotation///0005080 // protein kinase C binding // inferred from physical interaction///0005515 // protein binding // inferred from physical interaction///0005516 // calmodulin binding // inferred from electronic annotation	chr10:37133236-37138926 (-) // 92.26 // qB1		2013-10-23	This probe set was annotated using the Matching Probes based pipeline to a Entrez Gene identifier using 8 transcripts. // false // Matching Probes // A	AK200301 // gb // 3 // Cross Hyb Matching Probes	AK082623(10),AK136452(10),AK151646(10),AK153217(10),BC046601(10),ENSMUST00000092584(10),M60474(10),NM_008538(10)	Mm.30059	chr10 B1|10 19.49 cM	37138926	chr10	92.26	37133236	-		ENSMUSG00000069662		myristoylated alanine rich protein kinase C substrate	Mouse Genome 430 2.0 Array	December 2011 (Mouse Genome Sequencing Consortium and NCBI 38)	GO:0005737|GO:0005737|GO:0005813|GO:0005856|GO:0005938|GO:0016020|GO:0042585|GO:0003779|GO:0005080|GO:0005515|GO:0005516	IPR002101 // Myristoylated alanine-rich C-kinase substrate MARCKS // 6.0E-110	96907				NP_032564	NM_008538	AW546141		GenBank	Consensus sequence		Mus musculus	P26645///Q05BL6	gb:NM_008538.1 /DB_XREF=gi:6678767 /GEN=Macs /FEA=FLmRNA /CNT=608 /TID=Mm.30059.1 /TIER=FL+Stack /STK=155 /UG=Mm.30059 /LL=17118 /DEF=Mus musculus myristoylated alanine rich protein kinase C substrate (Macs), mRNA. /PROD=myristoylated alanine rich protein kinase Csubstrate /FL=gb:NM_008538.1 gb:M60474.1
1416361_a_at	26.6771	4.73753	26.6771	up	467.964	17.5418	2.36876	-2.36876	Dync1i1	13426	0006810 // transport // inferred from electronic annotation///0007018 // microtubule-based movement // inferred from electronic annotation///0047496 // vesicle transport along microtubule // not recorded	0000775 // chromosome, centromeric region // inferred from electronic annotation///0000776 // kinetochore // not recorded///0000777 // condensed chromosome kinetochore // inferred from electronic annotation///0000922 // spindle pole // not recorded///0005694 // chromosome // inferred from electronic annotation///0005737 // cytoplasm // inferred from electronic annotation///0005856 // cytoskeleton…	0003774 // motor activity // inferred from electronic annotation///0003777 // microtubule motor activity // not recorded///0005515 // protein binding // inferred from physical interaction///0008017 // microtubule binding // not recorded	chr6:5725740-6028039 (+) // 94.49 // qA1		2013-10-23	This probe set was annotated using the Matching Probes based pipeline to a Entrez Gene identifier using 15 transcripts. // false // Matching Probes // A		AF063229(11),AF063230(11),AK158589(11),BC051992(11),ENSMUST00000115554(11),ENSMUST00000115555(11),ENSMUST00000115556(11),ENSMUST00000115559(11),GU992206(11),GU992207(11),NM_001191023(11),NM_001191025(11),NM_001191026(11),NM_001191027(11),NM_010063(11)	Mm.20893	chr6 A1|6 2.26 cM	6028039	chr6	94.49	5725740	+		ENSMUSG00000029757		dynein cytoplasmic 1 intermediate chain 1	Mouse Genome 430 2.0 Array	December 2011 (Mouse Genome Sequencing Consortium and NCBI 38)	GO:0006810|GO:0007018|GO:0047496|GO:0000775|GO:0000776|GO:0000777|GO:0000922|GO:0005694|GO:0005737|GO:0005856|GO:0005868|GO:0005874|GO:0030286|GO:0031982|GO:0048471|GO:0003774|GO:0003777|GO:0005515|GO:0008017	IPR001680 // WD40 repeat // 1.6E-4///IPR001680 // WD40 repeat // 2.3E-5///IPR001680 // WD40 repeat // 5.3E-10///IPR001680 // WD40 repeat // 1.7E-4///IPR001680 // WD40 repeat // 2.4E-5///IPR001680 // WD40 repeat // 5.6E-10///IPR001680 // WD40 repeat // 1.7E-4///IPR001680 // WD40 repeat // 2.3E-5///IPR001680 // WD40 repeat // 5.4E-10///IPR001680 // WD40 repeat // 1.6E-4///IPR001680 // WD40 repeat /…	107743				NP_001177952///NP_001177954///NP_001177955///NP_001177956///NP_034193	NM_001191023///NM_001191025///NM_001191026///NM_001191027///NM_010063	NM_010063		GenBank	Consensus sequence		Mus musculus	Q3TYJ3///O88485///D6Q0F3///D6Q0F4///D3Z0M6	gb:NM_010063.1 /DB_XREF=gi:6753655 /GEN=Dncic1 /FEA=FLmRNA /CNT=110 /TID=Mm.20893.1 /TIER=FL+Stack /STK=95 /UG=Mm.20893 /LL=13426 /DEF=Mus musculus dynein, cytoplasmic, intermediate chain 1 (Dncic1), mRNA. /PROD=dynein, cytoplasmic, intermediate chain 1 /FL=gb:NM_010063.1 gb:AF063229.1
1416398_at	-11.2963	-3.49778	11.2963	down	24.6087	277.986	-1.74889	1.74889	Mesdc1	80889			0005515 // protein binding // inferred from physical interaction	chr7:83880494-83884341 (-) // 97.47 // qD3		2013-10-23	This probe set was annotated using the Matching Probes based pipeline to a Entrez Gene identifier using 4 transcripts. // false // Matching Probes // A	AK162446 // gb // 6 // Cross Hyb Matching Probes	AK036338(11),AK084510(11),ENSMUST00000094216(11),NM_030705(11)	Mm.41654	chr7 D3|7	83884341	chr7	97.47	83880494	-		ENSMUSG00000070462		mesoderm development candidate 1	Mouse Genome 430 2.0 Array	December 2011 (Mouse Genome Sequencing Consortium and NCBI 38)	GO:0005515		1891420				NP_109630	NM_030705	BB474887		GenBank	Consensus sequence		Mus musculus	Q9ERE8///Q9EPQ5	gb:BB474887 /DB_XREF=gi:16439930 /DB_XREF=BB474887 /CLONE=D330010D18 /FEA=FLmRNA /CNT=171 /TID=Mm.41654.1 /TIER=ConsEnd /STK=1 /UG=Mm.41654 /LL=80889 /UG_GENE=Mesdc1 /UG_TITLE=mesoderm development candidate 1 /FL=gb:NM_030705.1 gb:BC018326.1
1416401_at	12.3501	3.62645	12.3501	up	1041.84	84.359	1.81323	-1.81323	Cd82	12521		0016020 // membrane // inferred from electronic annotation///0016021 // integral to membrane // inferred from electronic annotation	0005515 // protein binding // inferred from electronic annotation	chr2:93419106-93462484 (-) // 93.63 // qE1		2013-10-23	This probe set was annotated using the Matching Probes based pipeline to a Entrez Gene identifier using 18 transcripts. // false // Matching Probes // A	BC132559 // gb // 6 // Cross Hyb Matching Probes///BC132565 // gb // 6 // Cross Hyb Matching Probes///ENSMUST00000126772 // ensembl // 1 // Cross Hyb Matching Probes	AK135381(11),AK146912(11),AK152871(11),AK153070(11),AK160907(11),AK168097(11),AK168515(11),D14883(11),ENSMUST00000028644(11),ENSMUST00000099696(11),ENSMUST00000116457(11),NM_001136055(11),NM_001271430(11),NM_001271431(11),NM_001271432(11),NM_001271461(11),NM_001271462(11),NM_007656(11)	Mm.4261	chr2 E1|2 51.62 cM	93462484	chr2	93.63	93419106	-		ENSMUSG00000027215		CD82 antigen	Mouse Genome 430 2.0 Array	December 2011 (Mouse Genome Sequencing Consortium and NCBI 38)	GO:0016020|GO:0016021|GO:0005515	IPR018499 // Tetraspanin/Peripherin // 1.5E-54	104651				NP_001129527///NP_001258359///NP_001258360///NP_001258361///NP_001258390///NP_001258391///NP_031682	NM_001136055///NM_001271430///NM_001271431///NM_001271432///NM_001271461///NM_001271462///NM_007656	NM_007656		GenBank	Consensus sequence		Mus musculus	Q3UII2///P40237///A2AIJ1///A2AIJ2///A2AIJ4	gb:NM_007656.1 /DB_XREF=gi:6671717 /GEN=Kai1 /FEA=FLmRNA /CNT=154 /TID=Mm.4261.1 /TIER=FL+Stack /STK=92 /UG=Mm.4261 /LL=12521 /DEF=Mus musculus kangai 1 (suppression of tumorigenicity 6, prostate) (Kai1), mRNA. /PROD=kangai 1 (suppression of tumorigenicity 6,prostate) /FL=gb:D14883.1 gb:NM_007656.1
1416612_at	17.7938	4.1533	17.7938	up	464.825	26.1229	2.07665	-2.07665	Cyp1b1	13078	0001525 // angiogenesis // inferred from mutant phenotype///0006725 // cellular aromatic compound metabolic process // inferred from direct assay///0006725 // cellular aromatic compound metabolic process // inferred from mutant phenotype///0006725 // cellular aromatic compound metabolic process // not recorded///0006805 // xenobiotic metabolic process // not recorded///0008202 // steroid metaboli…	0005783 // endoplasmic reticulum // inferred from electronic annotation///0005789 // endoplasmic reticulum membrane // inferred from electronic annotation///0016020 // membrane // inferred from electronic annotation///0031090 // organelle membrane // inferred from electronic annotation///0043231 // intracellular membrane-bounded organelle // not recorded	0004497 // monooxygenase activity // inferred from electronic annotation///0005506 // iron ion binding // inferred from electronic annotation///0009055 // electron carrier activity // inferred from electronic annotation///0016491 // oxidoreductase activity // not recorded///0016705 // oxidoreductase activity, acting on paired donors, with incorporation or reduction of molecular oxygen // inferred…	chr17:79706893-79715061 (-) // 99.75 // qE3		2013-10-23	This probe set was annotated using the Matching Probes based pipeline to a Entrez Gene identifier using 4 transcripts. // false // Matching Probes // A		AK139368(11),ENSMUST00000024894(11),NM_009994(11),U03283(11)	Mm.4443	chr17 E3|17	79715061	chr17	99.75	79706893	-	EC:1.14.14.1	ENSMUSG00000024087		cytochrome P450, family 1, subfamily b, polypeptide 1	Mouse Genome 430 2.0 Array	December 2011 (Mouse Genome Sequencing Consortium and NCBI 38)	GO:0001525|GO:0006725|GO:0006725|GO:0006725|GO:0006805|GO:0008202|GO:0008210|GO:0009404|GO:0009636|GO:0010033|GO:0018894|GO:0043542|GO:0055114|GO:0055114|GO:0061298|GO:0071603|GO:0005783|GO:0005789|GO:0016020|GO:0031090|GO:0043231|GO:0004497|GO:0005506|GO:0009055|GO:0016491|GO:0016705|GO:0016712|GO:0016712|GO:0020037|GO:0046872|GO:0070330	IPR001128 // Cytochrome P450 // 5.9E-104	88590				NP_034124	NM_009994	BI251808		GenBank	Consensus sequence		Mus musculus	Q3UTK2///Q64429///Q8BRY0///Q9CUA1///Q80V82///Q8C685	gb:NM_009994.1 /DB_XREF=gi:6753567 /GEN=Cyp1b1 /FEA=FLmRNA /CNT=163 /TID=Mm.4443.1 /TIER=FL+Stack /STK=78 /UG=Mm.4443 /LL=13078 /DEF=Mus musculus cytochrome P450, 1b1, benz(a)anthracene inducible (Cyp1b1), mRNA. /PROD=cytochrome P450, 1b1, benz(a)anthraceneinducible /FL=gb:NM_009994.1 gb:U03283.1
1416613_at	16.2407	4.02154	16.2407	up	117.338	7.2249	2.01077	-2.01077	Cyp1b1	13078	0001525 // angiogenesis // inferred from mutant phenotype///0006725 // cellular aromatic compound metabolic process // inferred from direct assay///0006725 // cellular aromatic compound metabolic process // inferred from mutant phenotype///0006725 // cellular aromatic compound metabolic process // not recorded///0006805 // xenobiotic metabolic process // not recorded///0008202 // steroid metaboli…	0005783 // endoplasmic reticulum // inferred from electronic annotation///0005789 // endoplasmic reticulum membrane // inferred from electronic annotation///0016020 // membrane // inferred from electronic annotation///0031090 // organelle membrane // inferred from electronic annotation///0043231 // intracellular membrane-bounded organelle // not recorded	0004497 // monooxygenase activity // inferred from electronic annotation///0005506 // iron ion binding // inferred from electronic annotation///0009055 // electron carrier activity // inferred from electronic annotation///0016491 // oxidoreductase activity // not recorded///0016705 // oxidoreductase activity, acting on paired donors, with incorporation or reduction of molecular oxygen // inferred…	chr17:79706893-79715061 (-) // 99.75 // qE3		2013-10-23	This probe set was annotated using the Matching Probes based pipeline to a Entrez Gene identifier using 5 transcripts. // false // Matching Probes // A	AK041078 // gb // 2 // Cross Hyb Matching Probes	AK137461(11),BC050063(10),ENSMUST00000024894(11),NM_009994(11),U03283(11)	Mm.4443	chr17 E3|17	79715061	chr17	99.75	79706893	-	EC:1.14.14.1	ENSMUSG00000024087		cytochrome P450, family 1, subfamily b, polypeptide 1	Mouse Genome 430 2.0 Array	December 2011 (Mouse Genome Sequencing Consortium and NCBI 38)	GO:0001525|GO:0006725|GO:0006725|GO:0006725|GO:0006805|GO:0008202|GO:0008210|GO:0009404|GO:0009636|GO:0010033|GO:0018894|GO:0043542|GO:0055114|GO:0055114|GO:0061298|GO:0071603|GO:0005783|GO:0005789|GO:0016020|GO:0031090|GO:0043231|GO:0004497|GO:0005506|GO:0009055|GO:0016491|GO:0016705|GO:0016712|GO:0016712|GO:0020037|GO:0046872|GO:0070330	IPR001128 // Cytochrome P450 // 5.9E-104	88590				NP_034124	NM_009994	BI251808		GenBank	Consensus sequence		Mus musculus	Q64429///Q80V82///Q8BRY0///Q9CUA1///Q3UTK2///Q8C685	gb:BI251808 /DB_XREF=gi:14801643 /DB_XREF=602994754F1 /CLONE=IMAGE:5150724 /FEA=FLmRNA /CNT=163 /TID=Mm.4443.1 /TIER=Stack /STK=10 /UG=Mm.4443 /LL=13078 /UG_GENE=Cyp1b1 /UG_TITLE=cytochrome P450, 1b1, benz(a)anthracene inducible /FL=gb:NM_009994.1 gb:U03283.1
1417231_at	22.0121	4.46023	22.0121	up	2750.81	124.968	2.23011	-2.23011	Cldn2	12738	0016338 // calcium-independent cell-cell adhesion // inferred from direct assay	0005886 // plasma membrane // inferred from electronic annotation///0005923 // tight junction // inferred from direct assay///0016020 // membrane // inferred from electronic annotation///0016021 // integral to membrane // non-traceable author statement///0030054 // cell junction // inferred from electronic annotation	0005198 // structural molecule activity // inferred from electronic annotation///0005515 // protein binding // inferred from physical interaction///0042802 // identical protein binding // inferred from physical interaction	chrX:139808288-139811386 (+) // 93.12 // qF1		2013-10-23	This probe set was annotated using the Matching Probes based pipeline to a Entrez Gene identifier using 5 transcripts. // false // Matching Probes // A		AK004990(11),BC015252(11),BC085494(11),ENSMUST00000054889(11),NM_016675(11)	Mm.117068	chrX F1|X	139811386	chrX	93.12	139808288	+		ENSMUSG00000047230		claudin 2	Mouse Genome 430 2.0 Array	December 2011 (Mouse Genome Sequencing Consortium and NCBI 38)	GO:0016338|GO:0005886|GO:0005923|GO:0016020|GO:0016021|GO:0030054|GO:0005198|GO:0005515|GO:0042802	IPR004031 // PMP-22/EMP/MP20/Claudin // 1.2E-25	1276110				NP_057884	NM_016675	NM_016675		GenBank	Consensus sequence		Mus musculus	O88552///A3KGB5	gb:BC015252.1 /DB_XREF=gi:15929633 /FEA=FLmRNA /CNT=105 /TID=Mm.117068.1 /TIER=FL+Stack /STK=52 /UG=Mm.117068 /LL=12738 /UG_GENE=Cldn2 /DEF=Mus musculus, claudin 2, clone MGC:18348 IMAGE:4223446, mRNA, complete cds. /PROD=claudin 2 /FL=gb:AF072128.1 gb:BC015252.1 gb:NM_016675.1
1418208_at	-10.7372	-3.42454	10.7372	down	84.5193	907.499	-1.71227	1.71227	Pax8	18510	0001655 // urogenital system development // inferred from genetic interaction///0001656 // metanephros development // inferred from genetic interaction///0001658 // branching involved in ureteric bud morphogenesis // inferred from electronic annotation///0001822 // kidney development // inferred from electronic annotation///0001823 // mesonephros development // inferred from mutant phenotype///00…	0005634 // nucleus // inferred from direct assay///0005634 // nucleus // not recorded///0005654 // nucleoplasm // not recorded///0005667 // transcription factor complex // traceable author statement	0000979 // RNA polymerase II core promoter sequence-specific DNA binding // not recorded///0001077 // RNA polymerase II core promoter proximal region sequence-specific DNA binding transcription factor activity involved in positive regulation of transcription // not recorded///0003677 // DNA binding // not recorded///0003677 // DNA binding // inferred from sequence or structural similarity///00037…	chr2:24420555-24475574 (-) // 97.63 // qA3		2013-10-23	This probe set was annotated using the Matching Probes based pipeline to a Entrez Gene identifier using 5 transcripts. // false // Matching Probes // A		AK050717(11),AK052610(11),BC020526(11),ENSMUST00000028355(11),NM_011040(11)	Mm.2533	chr2 B|2 16.43 cM	24475574	chr2	97.63	24420555	-		ENSMUSG00000026976		paired box gene 8	Mouse Genome 430 2.0 Array	December 2011 (Mouse Genome Sequencing Consortium and NCBI 38)	GO:0001655|GO:0001656|GO:0001658|GO:0001822|GO:0001823|GO:0003337|GO:0006351|GO:0006351|GO:0006355|GO:0006355|GO:0007275|GO:0007417|GO:0009887|GO:0030154|GO:0030878|GO:0030878|GO:0030878|GO:0039003|GO:0042472|GO:0042981|GO:0045893|GO:0045893|GO:0045893|GO:0045893|GO:0045944|GO:0048793|GO:0071371|GO:0071599|GO:0072050|GO:0072073|GO:0072108|GO:0072164|GO:0072207|GO:0072221|GO:0072278|GO:0072284|GO:…	IPR001523 // Paired domain // 5.7E-75///IPR022130 // Paired-box protein 2 C-terminal // 1.5E-53	97492				NP_035170	NM_011040	NM_011040		GenBank	Consensus sequence		Mus musculus	Q00288///Q8CIP2	gb:NM_011040.1 /DB_XREF=gi:6754989 /GEN=Pax8 /FEA=FLmRNA /CNT=39 /TID=Mm.2533.1 /TIER=FL+Stack /STK=28 /UG=Mm.2533 /LL=18510 /DEF=Mus musculus paired box gene 8 (Pax8), mRNA. /PROD=paired box gene 8 /FL=gb:BC020526.1 gb:NM_011040.1
1418209_a_at	124.542	6.96049	124.542	up	1213.91	9.74697	3.48024	-3.48024	Pfn2	18645	0007010 // cytoskeleton organization // inferred from electronic annotation///0030036 // actin cytoskeleton organization // inferred from electronic annotation///0030833 // regulation of actin filament polymerization // not recorded///0030837 // negative regulation of actin filament polymerization // inferred from direct assay///0030838 // positive regulation of actin filament polymerization // i…	0005737 // cytoplasm // inferred from electronic annotation///0005856 // cytoskeleton // inferred from electronic annotation///0015629 // actin cytoskeleton // inferred from electronic annotation///0043195 // terminal bouton // inferred from direct assay	0003779 // actin binding // not recorded///0005515 // protein binding // inferred from physical interaction	chr3:57841899-57847757 (-) // 89.04 // qD		2013-10-23	This probe set was annotated using the Matching Probes based pipeline to a Entrez Gene identifier using 6 transcripts. // false // Matching Probes // A		AK132651(11),AK164145(11),BC024363(11),ENSMUST00000066882(11),ENSMUST00000119344(11),NM_019410(11)	Mm.20399	chr3 D|3 28.15 cM	57847757	chr3	89.04	57841899	-		ENSMUSG00000027805		profilin 2	Mouse Genome 430 2.0 Array	December 2011 (Mouse Genome Sequencing Consortium and NCBI 38)	GO:0007010|GO:0030036|GO:0030833|GO:0030837|GO:0030838|GO:2000300|GO:0005737|GO:0005856|GO:0015629|GO:0043195|GO:0003779|GO:0005515		97550				NP_062283	NM_019410	NM_019410		GenBank	Consensus sequence		Mus musculus	Q9JJV2	gb:NM_019410.1 /DB_XREF=gi:9506970 /GEN=Pfn2 /FEA=FLmRNA /CNT=73 /TID=Mm.20399.1 /TIER=FL+Stack /STK=28 /UG=Mm.20399 /LL=18645 /DEF=Mus musculus profilin 2 (Pfn2), mRNA. /PROD=profilin 2 /FL=gb:BC024363.1 gb:NM_019410.1
1418210_at	45.1823	5.49768	45.1823	up	875.91	19.3861	2.74884	-2.74884	Pfn2	18645	0007010 // cytoskeleton organization // inferred from electronic annotation///0030036 // actin cytoskeleton organization // inferred from electronic annotation///0030833 // regulation of actin filament polymerization // not recorded///0030837 // negative regulation of actin filament polymerization // inferred from direct assay///0030838 // positive regulation of actin filament polymerization // i…	0005737 // cytoplasm // inferred from electronic annotation///0005856 // cytoskeleton // inferred from electronic annotation///0015629 // actin cytoskeleton // inferred from electronic annotation///0043195 // terminal bouton // inferred from direct assay	0003779 // actin binding // not recorded///0005515 // protein binding // inferred from physical interaction	chr3:57841899-57847757 (-) // 89.04 // qD		2013-10-23	This probe set was annotated using the Matching Probes based pipeline to a Entrez Gene identifier using 6 transcripts. // false // Matching Probes // A		AK132651(10),AK164145(11),BC024363(11),ENSMUST00000066882(11),ENSMUST00000119344(11),NM_019410(11)	Mm.20399	chr3 D|3 28.15 cM	57847757	chr3	89.04	57841899	-		ENSMUSG00000027805		profilin 2	Mouse Genome 430 2.0 Array	December 2011 (Mouse Genome Sequencing Consortium and NCBI 38)	GO:0007010|GO:0030036|GO:0030833|GO:0030837|GO:0030838|GO:2000300|GO:0005737|GO:0005856|GO:0015629|GO:0043195|GO:0003779|GO:0005515		97550				NP_062283	NM_019410	NM_019410		GenBank	Consensus sequence		Mus musculus	Q9JJV2	gb:NM_019410.1 /DB_XREF=gi:9506970 /GEN=Pfn2 /FEA=FLmRNA /CNT=73 /TID=Mm.20399.1 /TIER=FL+Stack /STK=28 /UG=Mm.20399 /LL=18645 /DEF=Mus musculus profilin 2 (Pfn2), mRNA. /PROD=profilin 2 /FL=gb:BC024363.1 gb:NM_019410.1
1418237_s_at	17.9776	4.16813	17.9776	up	690.051	38.3838	2.08407	-2.08407	Col18a1	12822	0001525 // angiogenesis // inferred from direct assay///0001525 // angiogenesis // inferred from mutant phenotype///0001886 // endothelial cell morphogenesis // inferred from direct assay///0007155 // cell adhesion // inferred from electronic annotation///0007275 // multicellular organismal development // inferred from electronic annotation///0008284 // positive regulation of cell proliferation /…	0005576 // extracellular region // inferred from electronic annotation///0005578 // proteinaceous extracellular matrix // inferred from electronic annotation///0005581 // collagen // inferred from electronic annotation///0005604 // basement membrane // inferred from direct assay///0005615 // extracellular space // not recorded///0031012 // extracellular matrix // not recorded	0005198 // structural molecule activity // inferred from electronic annotation///0005515 // protein binding // inferred from electronic annotation///0042802 // identical protein binding // not recorded///0046872 // metal ion binding // inferred from electronic annotation	chr10:77053037-77166538 (-) // 98.38 // qC1		2013-10-23	This probe set was annotated using the Matching Probes based pipeline to a Entrez Gene identifier using 8 transcripts. // false // Matching Probes // A	GENSCAN00000054438 // ensembl // 7 // Cross Hyb Matching Probes	AK014292(11),BC064817(11),BC066080(11),ENSMUST00000072755(11),ENSMUST00000081654(11),ENSMUST00000105409(11),NM_001109991(11),NM_009929(11)	Mm.196000	chr10 B5-C1|10 39.72 cM	77166538	chr10	98.38	77053037	-		ENSMUSG00000001435		collagen, type XVIII, alpha 1	Mouse Genome 430 2.0 Array	December 2011 (Mouse Genome Sequencing Consortium and NCBI 38)	GO:0001525|GO:0001525|GO:0001886|GO:0007155|GO:0007275|GO:0008284|GO:0016055|GO:0030198|GO:0030335|GO:0042493|GO:0043065|GO:0051599|GO:2000353|GO:0005576|GO:0005578|GO:0005581|GO:0005604|GO:0005615|GO:0031012|GO:0005198|GO:0005515|GO:0042802|GO:0046872	IPR008160 // Collagen triple helix repeat // 7.2E-13///IPR008160 // Collagen triple helix repeat // 7.8E-12///IPR008160 // Collagen triple helix repeat // 1.6E-10///IPR008160 // Collagen triple helix repeat // 9.3E-12///IPR008160 // Collagen triple helix repeat // 1.9E-10///IPR008160 // Collagen triple helix repeat // 8.6E-10///IPR008160 // Collagen triple helix repeat // 1.1E-11///IPR008160 // C…	88451				NP_001103461///NP_034059	NM_001109991///NM_009929	NM_009929		GenBank	Consensus sequence		Mus musculus	P39061///E9QPX1///D3Z556///D3Z5C2	gb:NM_009929.1 /DB_XREF=gi:13937350 /GEN=Col18a1 /FEA=FLmRNA /CNT=121 /TID=Mm.196000.1 /TIER=FL+Stack /STK=27 /UG=Mm.196000 /LL=12822 /DEF=Mus musculus procollagen, type XVIII, alpha 1 (Col18a1), mRNA. /PROD=procollagen, type XVIII, alpha 1 /FL=gb:NM_009929.1
1418306_at	11.7644	3.55635	11.7644	up	509.852	43.3386	1.77818	-1.77818	Crybb1	12960			0005212 // structural constituent of eye lens // inferred from electronic annotation///0005515 // protein binding // inferred from physical interaction	chr5:112255844-112269585 (+) // 97.29 // qF		2013-10-23	This probe set was annotated using the Matching Probes based pipeline to a Entrez Gene identifier using 8 transcripts. // false // Matching Probes // A	AK076443 // gb // 5 // Cross Hyb Matching Probes	AF106853(11),AK014012(11),AK053869(11),BC029012(11),ENSMUST00000031286(11),ENSMUST00000112375(11),ENSMUST00000131673(11),NM_023695(11)	Mm.29488	chr5 F|5 54.63 cM	112269585	chr5	97.29	112255844	+		ENSMUSG00000029343		crystallin, beta B1	Mouse Genome 430 2.0 Array	December 2011 (Mouse Genome Sequencing Consortium and NCBI 38)	GO:0005212|GO:0005515	IPR001064 // Beta/gamma crystallin // 1.3E-30///IPR001064 // Beta/gamma crystallin // 4.1E-32///IPR001064 // Beta/gamma crystallin // 1.2E-30///IPR001064 // Beta/gamma crystallin // 3.7E-32	104992				NP_076184	NM_023695	NM_023695		GenBank	Consensus sequence		Mus musculus	Q9WVJ5///Q8K106///E9PYP8///Q9R082	gb:NM_023695.1 /DB_XREF=gi:12963788 /GEN=Crybb1 /FEA=FLmRNA /CNT=41 /TID=Mm.29488.1 /TIER=FL+Stack /STK=26 /UG=Mm.29488 /LL=12960 /DEF=Mus musculus crystallin, beta B1 (Crybb1), mRNA. /PROD=crystallin, beta B1 /FL=gb:AF106853.1 gb:NM_023695.1
1418406_at	-14.0943	-3.81704	14.0943	down	16.6896	235.229	-1.90852	1.90852	Pde8a	18584	0000160 // phosphorelay signal transduction system // inferred from electronic annotation///0006198 // cAMP catabolic process // inferred from electronic annotation///0006355 // regulation of transcription, DNA-dependent // inferred from electronic annotation///0007165 // signal transduction // inferred from electronic annotation///0008152 // metabolic process // inferred from direct assay///0035…	0005622 // intracellular // inferred from electronic annotation	0000156 // phosphorelay response regulator activity // inferred from electronic annotation///0003824 // catalytic activity // inferred from electronic annotation///0004114 // 3',5'-cyclic-nucleotide phosphodiesterase activity // inferred from electronic annotation///0004115 // 3',5'-cyclic-AMP phosphodiesterase activity // inferred from direct assay///0004871 // signal transducer activity // infe…	chr7:81213737-81334533 (+) // 97.74 // qD3		2013-10-23	This probe set was annotated using the Matching Probes based pipeline to a Entrez Gene identifier using 3 transcripts. // false // Matching Probes // A		AF067806(11),AK148238(11),ENSMUST00000026672(11)	Mm.9757	chr7 D3|7	81334533	chr7	97.74	81213737	+	EC:3.1.4.17	ENSMUSG00000025584		phosphodiesterase 8A	Mouse Genome 430 2.0 Array	December 2011 (Mouse Genome Sequencing Consortium and NCBI 38)	GO:0000160|GO:0006198|GO:0006355|GO:0007165|GO:0008152|GO:0035556|GO:0005622|GO:0000156|GO:0003824|GO:0004114|GO:0004115|GO:0004871|GO:0008081|GO:0016787|GO:0046872	IPR001789 // Signal transduction response regulator, receiver domain // 4.2E-19///IPR002073 // 3'5'-cyclic nucleotide phosphodiesterase, catalytic domain // 3.6E-67///IPR013656 // PAS fold-4 // 4.3E-9///IPR013767 // PAS fold // 1.1E-14	1277116		G_Protein_Signaling // GenMAPP		NP_032829	NM_008803	BB220000		GenBank	Consensus sequence		Mus musculus	Q3UFX9///O88502///Q3UEE9	gb:NM_008803.1 /DB_XREF=gi:6679248 /GEN=Pde8a /FEA=FLmRNA /CNT=53 /TID=Mm.9757.1 /TIER=FL+Stack /STK=24 /UG=Mm.9757 /LL=18584 /DEF=Mus musculus phosphodiesterase 8A (Pde8a), mRNA. /PROD=phosphodiesterase 8A /FL=gb:AF067806.1 gb:NM_008803.1
1418788_at	-35.3677	-5.14436	35.3677	down	10.8123	382.407	-2.57218	2.57218	Tek	21687	0001525 // angiogenesis // inferred from mutant phenotype///0001525 // angiogenesis // traceable author statement///0001569 // patterning of blood vessels // traceable author statement///0001570 // vasculogenesis // inferred from mutant phenotype///0001934 // positive regulation of protein phosphorylation // not recorded///0001935 // endothelial cell proliferation // inferred from mutant phenotyp…	0001725 // stress fiber // not recorded///0005576 // extracellular region // inferred from electronic annotation///0005737 // cytoplasm // inferred from electronic annotation///0005856 // cytoskeleton // inferred from electronic annotation///0005884 // actin filament // not recorded///0005886 // plasma membrane // inferred from electronic annotation///0005887 // integral to plasma membrane // not…	0000166 // nucleotide binding // inferred from electronic annotation///0004672 // protein kinase activity // inferred from electronic annotation///0004713 // protein tyrosine kinase activity // inferred from direct assay///0004713 // protein tyrosine kinase activity // not recorded///0004714 // transmembrane receptor protein tyrosine kinase activity // inferred from electronic annotation///000487…	chr4:94739299-94874939 (+) // 98.41 // qC5		2013-10-23	This probe set was annotated using the Matching Probes based pipeline to a Entrez Gene identifier using 5 transcripts. // false // Matching Probes // A	ENSMUST00000071168 // ensembl // 8 // Cross Hyb Matching Probes	BC050824(11),D13738(10),ENSMUST00000073939(11),ENSMUST00000102798(11),NM_013690(11)	Mm.14313	chr4 C5|4 43.34 cM	94874939	chr4	98.41	94739299	+	EC:2.7.10.1	ENSMUSG00000006386		endothelial-specific receptor tyrosine kinase	Mouse Genome 430 2.0 Array	December 2011 (Mouse Genome Sequencing Consortium and NCBI 38)	GO:0001525|GO:0001525|GO:0001569|GO:0001570|GO:0001934|GO:0001935|GO:0001936|GO:0002040|GO:0006468|GO:0007160|GO:0007169|GO:0007507|GO:0010595|GO:0010595|GO:0010740|GO:0014068|GO:0016310|GO:0016337|GO:0016525|GO:0018108|GO:0018108|GO:0030097|GO:0030334|GO:0030949|GO:0032526|GO:0032878|GO:0033138|GO:0034446|GO:0035556|GO:0043066|GO:0043552|GO:0043627|GO:0045765|GO:0045766|GO:0045785|GO:0046777|GO:…	IPR000719 // Protein kinase, catalytic domain // 2.8E-50///IPR000719 // Protein kinase, catalytic domain // 3.0E-50///IPR001245 // Serine-threonine/tyrosine-protein kinase catalytic domain // 5.2E-94///IPR001245 // Serine-threonine/tyrosine-protein kinase catalytic domain // 5.7E-94///IPR003961 // Fibronectin, type III // 4.5E-10///IPR003961 // Fibronectin, type III // 5.5E-13///IPR003961 // Fibr…	98664				NP_038718	NM_013690	NM_013690		GenBank	Consensus sequence		Mus musculus	Q80YS4///Q02858///B1AWS8	gb:NM_013690.1 /DB_XREF=gi:8567411 /GEN=Tek /FEA=FLmRNA /CNT=36 /TID=Mm.14313.1 /TIER=FL+Stack /STK=18 /UG=Mm.14313 /LL=21687 /DEF=Mus musculus endothelial-specific receptor tyrosine kinase (Tek), mRNA. /PROD=endothelial-specific receptor tyrosine kinase /FL=gb:NM_013690.1 gb:D13738.1
1418826_at	-11.1368	-3.47727	11.1368	down	12.1632	135.459	-1.73863	1.73863	Ms4a6b	69774		0016020 // membrane // inferred from electronic annotation///0016021 // integral to membrane // inferred from electronic annotation		chr19:11518450-11530403 (+) // 94.03 // qA		2013-10-23	This probe set was annotated using the Matching Probes based pipeline to a Entrez Gene identifier using 9 transcripts. // false // Matching Probes // A	AK149773 // gb // 8 // Cross Hyb Matching Probes///AK150397 // gb // 5 // Cross Hyb Matching Probes///AK152258 // gb // 4 // Cross Hyb Matching Probes///NM_028595 // refseq // 5 // Cross Hyb Matching Probes///ENSMUST00000165310 // ensembl // 5 // Cross Hyb Matching Probes	AF237909(11),AK007613(11),AK075671(11),AK172345(11),BC027425(10),ENSMUST00000025580(11),ENSMUST00000161157(11),ENSMUST00000163078(11),NM_027209(11)	Mm.29487		11530403	chr19	94.03	11518450	+		ENSMUSG00000024677		membrane-spanning 4-domains, subfamily A, member 6B	Mouse Genome 430 2.0 Array	December 2011 (Mouse Genome Sequencing Consortium and NCBI 38)	GO:0016020|GO:0016021	IPR007237 // CD20-like // 7.8E-43///IPR007237 // CD20-like // 2.1E-21	1917024				NP_081485	NM_027209	NM_027209		GenBank	Consensus sequence		Mus musculus	Q99N09///E0CZC1///F6TGK4	gb:NM_027209.1 /DB_XREF=gi:13386211 /GEN=1810027D10Rik /FEA=FLmRNA /CNT=53 /TID=Mm.29487.1 /TIER=FL+Stack /STK=17 /UG=Mm.29487 /LL=69774 /DEF=Mus musculus RIKEN cDNA 1810027D10 gene (1810027D10Rik), mRNA. /PROD=RIKEN cDNA 1810027D10 /FL=gb:BC027425.1 gb:AF237909.1 gb:NM_027209.1
1418979_at	-11.9152	-3.57473	11.9152	down	53.9269	642.55	-1.78737	1.78737	Akr1c14	105387	0021766 // hippocampus development // inferred from electronic annotation///0055114 // oxidation-reduction process // inferred from direct assay///0055114 // oxidation-reduction process // not recorded		0016229 // steroid dehydrogenase activity // not recorded///0016491 // oxidoreductase activity // inferred from electronic annotation///0047023 // androsterone dehydrogenase activity // inferred from direct assay	chr13:4049032-4090820 (+) // 86.32 // qA1		2013-10-23	This probe set was annotated using the Matching Probes based pipeline to a Entrez Gene identifier using 6 transcripts. // false // Matching Probes // A		AK033537(11),BC013482(11),BC026628(11),ENSMUST00000041768(11),ENSMUST00000118717(11),NM_134072(11)	Mm.26838	chr13 A1|13	4090820	chr13	86.32	4049032	+	EC:1.1.1.213///EC:1.1.1.50	ENSMUSG00000033715		aldo-keto reductase family 1, member C14	Mouse Genome 430 2.0 Array	December 2011 (Mouse Genome Sequencing Consortium and NCBI 38)	GO:0021766|GO:0055114|GO:0055114|GO:0016229|GO:0016491|GO:0047023	IPR023210 // NADP-dependent oxidoreductase domain // 3.5E-56	2145458				NP_598833	NM_134072	NM_134072		GenBank	Consensus sequence		Mus musculus	Q91WT7	gb:NM_134072.1 /DB_XREF=gi:19527293 /GEN=AW557061 /FEA=FLmRNA /CNT=83 /TID=Mm.26838.1 /TIER=FL+Stack /STK=15 /UG=Mm.26838 /LL=105387 /DEF=Mus musculus expressed sequence AW557061 (AW557061), mRNA. /PROD=expressed sequence AW557061 /FL=gb:BC026628.1 gb:BC013482.1 gb:NM_134072.1
1419088_at	-13.682	-3.77421	13.682	down	13.6288	186.469	-1.88711	1.88711	Timp3	21859	0007417 // central nervous system development // inferred from electronic annotation///0007568 // aging // inferred from electronic annotation///0009612 // response to mechanical stimulus // inferred from electronic annotation///0010466 // negative regulation of peptidase activity // inferred from electronic annotation///0014070 // response to organic cyclic compound // inferred from electronic a…	0005576 // extracellular region // inferred from electronic annotation///0005578 // proteinaceous extracellular matrix // inferred from electronic annotation///0005604 // basement membrane // inferred from direct assay///0005737 // cytoplasm // not recorded///0031012 // extracellular matrix // not recorded	0004857 // enzyme inhibitor activity // inferred from electronic annotation///0005515 // protein binding // inferred from electronic annotation///0008191 // metalloendopeptidase inhibitor activity // inferred from electronic annotation///0030414 // peptidase inhibitor activity // inferred from electronic annotation///0046872 // metal ion binding // inferred from electronic annotation	chr10:86300411-86349508 (+) // 96.36 // qC1		2013-10-23	This probe set was annotated using the Matching Probes based pipeline to a Entrez Gene identifier using 6 transcripts. // false // Matching Probes // A	L27424 // gb // 6 // Cross Hyb Matching Probes	AK083905(10),AK147847(10),BC014713(11),ENSMUST00000020234(10),L19622(10),NM_011595(10)	Mm.4871	chr10 C1-D1|10 42.83 cM	86349508	chr10	96.36	86300411	+		ENSMUSG00000020044		tissue inhibitor of metalloproteinase 3	Mouse Genome 430 2.0 Array	December 2011 (Mouse Genome Sequencing Consortium and NCBI 38)	GO:0007417|GO:0007568|GO:0009612|GO:0010466|GO:0014070|GO:0042246|GO:0043200|GO:0043627|GO:0045861|GO:0051045|GO:0051593|GO:0071310|GO:0005576|GO:0005578|GO:0005604|GO:0005737|GO:0031012|GO:0004857|GO:0005515|GO:0008191|GO:0030414|GO:0046872	IPR001820 // Proteinase inhibitor I35, tissue inhibitor of metalloproteinase // 2.3E-69	98754		Matrix_Metalloproteinases // GenMAPP		NP_035725	NM_011595	BI111620		GenBank	Consensus sequence		Mus musculus	P39876///Q54AE5///Q6GXA7	gb:L27424.1 /DB_XREF=gi:439881 /GEN=Timp-3 /FEA=FLmRNA /CNT=399 /TID=Mm.4871.1 /TIER=FL+Stack /STK=9 /UG=Mm.4871 /LL=21859 /UG_TITLE=tissue inhibitor of metalloproteinase 3 /DEF=Mouse metalloproteinase inhibitor (Timp-3) mRNA, complete cds. /FL=gb:BC014713.1 gb:L19622.1 gb:L27424.1 gb:NM_011595.1
1419089_at	-15.9097	-3.99184	15.9097	down	26.9498	428.764	-1.99592	1.99592	Timp3	21859	0007417 // central nervous system development // inferred from electronic annotation///0007568 // aging // inferred from electronic annotation///0009612 // response to mechanical stimulus // inferred from electronic annotation///0010466 // negative regulation of peptidase activity // inferred from electronic annotation///0014070 // response to organic cyclic compound // inferred from electronic a…	0005576 // extracellular region // inferred from electronic annotation///0005578 // proteinaceous extracellular matrix // inferred from electronic annotation///0005604 // basement membrane // inferred from direct assay///0005737 // cytoplasm // not recorded///0031012 // extracellular matrix // not recorded	0004857 // enzyme inhibitor activity // inferred from electronic annotation///0005515 // protein binding // inferred from electronic annotation///0008191 // metalloendopeptidase inhibitor activity // inferred from electronic annotation///0030414 // peptidase inhibitor activity // inferred from electronic annotation///0046872 // metal ion binding // inferred from electronic annotation	chr10:86300411-86349508 (+) // 96.36 // qC1		2013-10-23	This probe set was annotated using the Matching Probes based pipeline to a Entrez Gene identifier using 5 transcripts. // false // Matching Probes // A	AK082445 // gb // 11 // Negative Strand Matching Probes///ENSMUST00000123783 // ensembl // 11 // Negative Strand Matching Probes	AK083905(11),AK084069(11),AK147847(10),ENSMUST00000020234(11),NM_011595(11)	Mm.4871	chr10 C1-D1|10 42.83 cM	86349508	chr10	96.36	86300411	+		ENSMUSG00000020044		tissue inhibitor of metalloproteinase 3	Mouse Genome 430 2.0 Array	December 2011 (Mouse Genome Sequencing Consortium and NCBI 38)	GO:0007417|GO:0007568|GO:0009612|GO:0010466|GO:0014070|GO:0042246|GO:0043200|GO:0043627|GO:0045861|GO:0051045|GO:0051593|GO:0071310|GO:0005576|GO:0005578|GO:0005604|GO:0005737|GO:0031012|GO:0004857|GO:0005515|GO:0008191|GO:0030414|GO:0046872	IPR001820 // Proteinase inhibitor I35, tissue inhibitor of metalloproteinase // 2.3E-69	98754		Matrix_Metalloproteinases // GenMAPP		NP_035725	NM_011595	BI111620		GenBank	Consensus sequence		Mus musculus	P39876///Q54AE5///Q6GXA7	gb:BM232384 /DB_XREF=gi:17867654 /DB_XREF=K0322E06-3 /CLONE=K0322E06 /FEA=FLmRNA /CNT=399 /TID=Mm.4871.1 /TIER=Stack /STK=63 /UG=Mm.4871 /LL=21859 /UG_GENE=Timp3 /UG_TITLE=tissue inhibitor of metalloproteinase 3 /FL=gb:BC014713.1 gb:L19622.1 gb:L27424.1 gb:NM_011595.1
1419136_at	-37.9854	-5.24737	37.9854	down	111.782	4246.07	-2.62369	2.62369	Akr1c18	105349	0000060 // protein import into nucleus, translocation // not recorded///0006709 // progesterone catabolic process // inferred from direct assay///0006709 // progesterone catabolic process // inferred from mutant phenotype///0007186 // G-protein coupled receptor signaling pathway // not recorded///0007567 // parturition // inferred from mutant phenotype///0008284 // positive regulation of cell pro…	0005622 // intracellular // not recorded///0005634 // nucleus // not recorded///0005737 // cytoplasm // not recorded///0005829 // cytosol // not recorded	0001758 // retinal dehydrogenase activity // not recorded///0004032 // alditol:NADP+ 1-oxidoreductase activity // not recorded///0004745 // retinol dehydrogenase activity // not recorded///0004958 // prostaglandin F receptor activity // not recorded///0016491 // oxidoreductase activity // inferred from electronic annotation///0016655 // oxidoreductase activity, acting on NAD(P)H, quinone or simil…	chr13:4132619-4150654 (-) // 97.04 // qA1		2013-10-23	This probe set was annotated using the Matching Probes based pipeline to a Entrez Gene identifier using 6 transcripts. // false // Matching Probes // A	GENSCAN00000014546 // ensembl // 7 // Cross Hyb Matching Probes	AB059565(11),AK153898(11),BC034259(11),ENSMUST00000021635(11),ENSMUST00000110704(11),NM_134066(11)	Mm.41337	chr13 A1|13	4150654	chr13	97.04	4132619	-	EC:1.1.1.149	ENSMUSG00000021214		aldo-keto reductase family 1, member C18	Mouse Genome 430 2.0 Array	December 2011 (Mouse Genome Sequencing Consortium and NCBI 38)	GO:0000060|GO:0006709|GO:0006709|GO:0007186|GO:0007567|GO:0008284|GO:0010942|GO:0016488|GO:0034614|GO:0034694|GO:0042448|GO:0042574|GO:0044597|GO:0044598|GO:0048385|GO:0050810|GO:0051897|GO:0055114|GO:0055114|GO:0055114|GO:0061370|GO:0071276|GO:0071277|GO:0071379|GO:0071384|GO:0071395|GO:1900053|GO:2000224|GO:2000353|GO:2000379|GO:0005622|GO:0005634|GO:0005737|GO:0005829|GO:0001758|GO:0004032|GO:…	IPR023210 // NADP-dependent oxidoreductase domain // 3.4E-58///IPR023210 // NADP-dependent oxidoreductase domain // 2.4E-54	2145420				NP_598827	NM_134066	NM_134066		GenBank	Consensus sequence		Mus musculus	Q3U538///Q8K023	gb:NM_134066.1 /DB_XREF=gi:19527283 /GEN=AW146047 /FEA=FLmRNA /CNT=28 /TID=Mm.41337.1 /TIER=FL+Stack /STK=13 /UG=Mm.41337 /LL=105349 /DEF=Mus musculus expressed sequence AW146047 (AW146047), mRNA. /PROD=expressed sequence AW146047 /FL=gb:AB059565.1 gb:NM_134066.1
1419378_a_at	-50.6944	-5.66375	50.6944	down	18.2385	924.591	-2.83188	2.83188	Fxyd2	11936	0001558 // regulation of cell growth // not recorded///0006810 // transport // inferred from electronic annotation///0006811 // ion transport // inferred from electronic annotation///0006813 // potassium ion transport // not recorded///0006814 // sodium ion transport // not recorded///0042127 // regulation of cell proliferation // not recorded	0005890 // sodium:potassium-exchanging ATPase complex // not recorded///0016020 // membrane // inferred from electronic annotation///0016021 // integral to membrane // inferred from electronic annotation///0016323 // basolateral plasma membrane // not recorded///0043231 // intracellular membrane-bounded organelle // not recorded	0005216 // ion channel activity // inferred from electronic annotation///0005391 // sodium:potassium-exchanging ATPase activity // not recorded///0005515 // protein binding // inferred from electronic annotation	chr9:45403204-45410260 (+) // 84.54 // qA5.2		2013-10-23	This probe set was annotated using the Matching Probes based pipeline to a Entrez Gene identifier using 11 transcripts. // false // Matching Probes // A	BC069892 // gb // 7 // Cross Hyb Matching Probes///GENSCAN00000012217 // ensembl // 7 // Cross Hyb Matching Probes	AK002215(11),AK002228(11),AK007105(9),AY626243(11),AY626244(11),AY626245(11),BC024614(11),ENSMUST00000041005(11),NM_007503(11),NM_052823(11),NR_028499(11)	Mm.22742	chr9|9 B	45410260	chr9	84.54	45403204	+		ENSMUSG00000059412		FXYD domain-containing ion transport regulator 2	Mouse Genome 430 2.0 Array	December 2011 (Mouse Genome Sequencing Consortium and NCBI 38)	GO:0001558|GO:0006810|GO:0006811|GO:0006813|GO:0006814|GO:0042127|GO:0005890|GO:0016020|GO:0016021|GO:0016323|GO:0043231|GO:0005216|GO:0005391|GO:0005515	IPR000272 // Ion-transport regulator, FXYD motif // 7.9E-29	1195260		Calcium_regulation_in_cardiac_cells // GenMAPP		NP_031529///NP_439888	NM_007503///NM_052823///NR_028499	NM_052823		GenBank	Consensus sequence		Mus musculus	Q04646///Q6ITT2///Q6ITT1///Q6ITT0	gb:NM_052823.1 /DB_XREF=gi:16554571 /GEN=Fxyd2 /FEA=FLmRNA /CNT=30 /TID=Mm.22742.1 /TIER=FL+Stack /STK=10 /UG=Mm.22742 /LL=11936 /DEF=Mus musculus FXYD domain-containing ion transport regulator 2 (Fxyd2), transcript variant b, mRNA. /PROD=FXYD domain-containing ion transport regulator2, isoform b /FL=gb:NM_052823.1
1419379_x_at	-16.1819	-4.01631	16.1819	down	41.9883	679.452	-2.00816	2.00816	Fxyd2	11936	0001558 // regulation of cell growth // not recorded///0006810 // transport // inferred from electronic annotation///0006811 // ion transport // inferred from electronic annotation///0006813 // potassium ion transport // not recorded///0006814 // sodium ion transport // not recorded///0042127 // regulation of cell proliferation // not recorded	0005890 // sodium:potassium-exchanging ATPase complex // not recorded///0016020 // membrane // inferred from electronic annotation///0016021 // integral to membrane // inferred from electronic annotation///0016323 // basolateral plasma membrane // not recorded///0043231 // intracellular membrane-bounded organelle // not recorded	0005216 // ion channel activity // inferred from electronic annotation///0005391 // sodium:potassium-exchanging ATPase activity // not recorded///0005515 // protein binding // inferred from electronic annotation	chr9:45403204-45410260 (+) // 84.54 // qA5.2		2013-10-23	This probe set was annotated using the Matching Probes based pipeline to a Entrez Gene identifier using 10 transcripts. // false // Matching Probes // A	n296280 // noncode // 7 // Cross Hyb Matching Probes///AK007105 // gb // 7 // Cross Hyb Matching Probes///AY626245 // gb // 8 // Cross Hyb Matching Probes///GENSCAN00000012217 // ensembl // 5 // Cross Hyb Matching Probes	AK002215(9),AK002228(9),AY626243(9),AY626244(11),BC024614(9),BC069892(9),ENSMUST00000041005(11),NM_007503(9),NM_052823(11),NR_028499(9)	Mm.22742	chr9|9 B	45410260	chr9	84.54	45403204	+		ENSMUSG00000059412		FXYD domain-containing ion transport regulator 2	Mouse Genome 430 2.0 Array	December 2011 (Mouse Genome Sequencing Consortium and NCBI 38)	GO:0001558|GO:0006810|GO:0006811|GO:0006813|GO:0006814|GO:0042127|GO:0005890|GO:0016020|GO:0016021|GO:0016323|GO:0043231|GO:0005216|GO:0005391|GO:0005515	IPR000272 // Ion-transport regulator, FXYD motif // 7.9E-29	1195260		Calcium_regulation_in_cardiac_cells // GenMAPP		NP_031529///NP_439888	NM_007503///NM_052823///NR_028499	NM_052823		GenBank	Consensus sequence		Mus musculus	Q04646///Q6ITT2///Q6ITT1///Q6ITT0	gb:NM_052823.1 /DB_XREF=gi:16554571 /GEN=Fxyd2 /FEA=FLmRNA /CNT=30 /TID=Mm.22742.1 /TIER=FL+Stack /STK=10 /UG=Mm.22742 /LL=11936 /DEF=Mus musculus FXYD domain-containing ion transport regulator 2 (Fxyd2), transcript variant b, mRNA. /PROD=FXYD domain-containing ion transport regulator2, isoform b /FL=gb:NM_052823.1
1419400_at	10.7213	3.4224	10.7213	up	224.377	20.9282	1.7112	-1.7112	Mttp	17777	0006497 // protein lipidation // inferred from direct assay///0006629 // lipid metabolic process // inferred from direct assay///0006641 // triglyceride metabolic process // inferred from direct assay///0006810 // transport // inferred from electronic annotation///0006869 // lipid transport // inferred from direct assay///0006869 // lipid transport // not recorded///0008202 // steroid metabolic p…	0005783 // endoplasmic reticulum // inferred from direct assay///0005791 // rough endoplasmic reticulum // not recorded///0005794 // Golgi apparatus // inferred from direct assay///0005794 // Golgi apparatus // not recorded///0016323 // basolateral plasma membrane // not recorded///0031526 // brush border membrane // not recorded///0031528 // microvillus membrane // not recorded///0031988 // memb…	0005319 // lipid transporter activity // inferred from direct assay///0005319 // lipid transporter activity // not recorded///0005515 // protein binding // inferred from physical interaction///0008289 // lipid binding // inferred from electronic annotation///0034185 // apolipoprotein binding // not recorded///0046982 // protein heterodimerization activity // not recorded	chr3:138089852-138131374 (-) // 98.11 // qG3		2013-10-23	This probe set was annotated using the Matching Probes based pipeline to a Entrez Gene identifier using 5 transcripts. // false // Matching Probes // A		AK160166(10),ENSMUST00000029805(11),ENSMUST00000098580(11),NM_001163457(11),NM_008642(11)	Mm.2941	chr3 G3|3 64.06 cM	138131374	chr3	98.11	138089852	-		ENSMUSG00000028158		microsomal triglyceride transfer protein	Mouse Genome 430 2.0 Array	December 2011 (Mouse Genome Sequencing Consortium and NCBI 38)	GO:0006497|GO:0006629|GO:0006641|GO:0006810|GO:0006869|GO:0006869|GO:0008202|GO:0008203|GO:0042157|GO:0042157|GO:0042632|GO:0042953|GO:0042953|GO:0051592|GO:0005783|GO:0005791|GO:0005794|GO:0005794|GO:0016323|GO:0031526|GO:0031528|GO:0031988|GO:0005319|GO:0005319|GO:0005515|GO:0008289|GO:0034185|GO:0046982	IPR001747 // Lipid transport protein, N-terminal // 1.4E-74///IPR001747 // Lipid transport protein, N-terminal // 1.3E-74	106926		Statin_Pathway_PharmGKB // GenMAPP		NP_001156929///NP_032668	NM_001163457///NM_008642	AW553649		GenBank	Consensus sequence		Mus musculus	Q3TVF2///O08601///Q3UWK4	gb:AW553649 /DB_XREF=gi:7199072 /DB_XREF=L0230A03-3 /CLONE=L0230A03 /FEA=FLmRNA /CNT=40 /TID=Mm.2941.1 /TIER=ConsEnd /STK=2 /UG=Mm.2941 /LL=17777 /UG_GENE=Mttp /UG_TITLE=microsomal triglyceride transfer protein /FL=gb:L47970.1 gb:NM_008642.1 gb:BC012686.1
1419524_at	16.6814	4.06017	16.6814	up	275.967	16.5434	2.03008	-2.03008	Tph1	21990	0006950 // response to stress // inferred from electronic annotation///0007623 // circadian rhythm // inferred from electronic annotation///0008152 // metabolic process // inferred from electronic annotation///0009072 // aromatic amino acid family metabolic process // inferred from electronic annotation///0030279 // negative regulation of ossification // not recorded///0035902 // response to immo…	0043005 // neuron projection // not recorded	0004497 // monooxygenase activity // inferred from electronic annotation///0004510 // tryptophan 5-monooxygenase activity // inferred from direct assay///0004510 // tryptophan 5-monooxygenase activity // not recorded///0005506 // iron ion binding // inferred from electronic annotation///0016491 // oxidoreductase activity // inferred from electronic annotation///0016597 // amino acid binding // in…	chr7:46647130-46667348 (-) // 97.3 // qB3		2013-10-23	This probe set was annotated using the Matching Probes based pipeline to a Entrez Gene identifier using 8 transcripts. // false // Matching Probes // A	GENSCAN00000007786 // ensembl // 6 // Cross Hyb Matching Probes///ENSMUST00000172386 // ensembl // 6 // Cross Hyb Matching Probes///ENSMUST00000170251 // ensembl // 6 // Cross Hyb Matching Probes///ENSMUST00000110264 // ensembl // 4 // Cross Hyb Matching Probes	AK146134(11),AK146171(10),BC072582(10),ENSMUST00000049298(11),ENSMUST00000107669(11),J04758(11),NM_001136084(11),NM_009414(11)	Mm.4421	chr7 B4|7 30.43 cM	46667348	chr7	97.3	46647130	-	EC:1.14.16.4	ENSMUSG00000040046		tryptophan hydroxylase 1	Mouse Genome 430 2.0 Array	December 2011 (Mouse Genome Sequencing Consortium and NCBI 38)	GO:0006950|GO:0007623|GO:0008152|GO:0009072|GO:0030279|GO:0035902|GO:0042427|GO:0046849|GO:0055114|GO:0055114|GO:0060749|GO:0043005|GO:0004497|GO:0004510|GO:0004510|GO:0005506|GO:0016491|GO:0016597|GO:0016714|GO:0046872	IPR002912 // ACT domain // 1.7E-9///IPR019774 // Aromatic amino acid hydroxylase, C-terminal // 7.3E-189	98796		Biogenic_Amine_Synthesis // GenMAPP		NP_001129556///NP_001263301///NP_033440	NM_001136084///NM_001276372///NM_009414	NM_009414		GenBank	Consensus sequence		Mus musculus	Q3UK52///P17532///Q3TZH2///Q9JHZ8	gb:NM_009414.1 /DB_XREF=gi:6678410 /GEN=Tph /FEA=FLmRNA /CNT=25 /TID=Mm.4421.1 /TIER=FL+Stack /STK=9 /UG=Mm.4421 /LL=21990 /DEF=Mus musculus tryptophan hydroxylase (Tph), mRNA. /PROD=tryptophan hydroxylase /FL=gb:NM_009414.1 gb:J04758.1
1420364_at	18.1554	4.18233	18.1554	up	846.508	46.6256	2.09116	-2.09117	Gpr87	84111	0007165 // signal transduction // inferred from electronic annotation///0007186 // G-protein coupled receptor signaling pathway // inferred from electronic annotation///0007194 // negative regulation of adenylate cyclase activity // inferred from electronic annotation///0035589 // G-protein coupled purinergic nucleotide receptor signaling pathway // inferred from electronic annotation	0005886 // plasma membrane // inferred from electronic annotation///0016020 // membrane // inferred from electronic annotation///0016021 // integral to membrane // inferred from electronic annotation	0004871 // signal transducer activity // inferred from electronic annotation///0004930 // G-protein coupled receptor activity // inferred from electronic annotation///0045028 // G-protein coupled purinergic nucleotide receptor activity // inferred from electronic annotation	chr3:59178913-59180085 (-) // 99.91 // qD		2013-10-23	This probe set was annotated using the Matching Probes based pipeline to a Entrez Gene identifier using 6 transcripts. // false // Matching Probes // A		AF295366(11),AK080394(11),BC125653(11),BC125655(11),ENSMUST00000056898(11),NM_032399(11)	Mm.60267	chr3 D|3	59180085	chr3	99.91	59178913	-		ENSMUSG00000051431		G protein-coupled receptor 87	Mouse Genome 430 2.0 Array	December 2011 (Mouse Genome Sequencing Consortium and NCBI 38)	GO:0007165|GO:0007186|GO:0007194|GO:0035589|GO:0005886|GO:0016020|GO:0016021|GO:0004871|GO:0004930|GO:0045028	IPR000276 // G protein-coupled receptor, rhodopsin-like // 1.6E-45	1934133		GPCRDB_Class_A_Rhodopsin-like // GenMAPP		NP_115775	NM_032399	NM_032399		GenBank	Consensus sequence		Mus musculus	Q99MT7///Q059H2	gb:NM_032399.1 /DB_XREF=gi:14161701 /GEN=Gpr87 /FEA=FLmRNA /CNT=6 /TID=Mm.60267.1 /TIER=FL /STK=6 /UG=Mm.60267 /LL=84111 /DEF=Mus musculus G protein-coupled receptor 87 (Gpr87), mRNA. /PROD=G protein-coupled receptor 87 /FL=gb:AF295366.1 gb:NM_032399.1
1420944_at	12.7248	3.66957	12.7248	up	244.651	19.2263	1.83479	-1.83479	Zfp185	22673		0005737 // cytoplasm // inferred from electronic annotation///0005856 // cytoskeleton // inferred from electronic annotation///0005925 // focal adhesion // inferred from electronic annotation///0030054 // cell junction // inferred from electronic annotation	0008270 // zinc ion binding // inferred from electronic annotation///0046872 // metal ion binding // inferred from electronic annotation	chrX:72987338-73031540 (+) // 99.52 // qA7.3		2013-10-23	This probe set was annotated using the Matching Probes based pipeline to a Entrez Gene identifier using 8 transcripts. // false // Matching Probes // A	BC020527 // gb // 11 // Negative Strand Matching Probes	AK014497(10),AK048188(11),BC039772(11),EF494744(11),ENSMUST00000114546(11),ENSMUST00000164800(11),NM_001109043(11),NM_009549(11)	Mm.1161	chrX A7.3|X 37.29 cM	73031540	chrX	99.52	72987338	+		ENSMUSG00000031351		zinc finger protein 185	Mouse Genome 430 2.0 Array	December 2011 (Mouse Genome Sequencing Consortium and NCBI 38)	GO:0005737|GO:0005856|GO:0005925|GO:0030054|GO:0008270|GO:0046872		108095				NP_001102513///NP_033575	NM_001109043///NM_009549	AK014497		GenBank	Consensus sequence		Mus musculus	Q9CRR9///Q8C875///Q8CHR0///D7EYE4///G5E8W8///A2BI37///Q9JJQ5///Q9JJR3///B1AXE7///Q62394	gb:AK014497.1 /DB_XREF=gi:12852393 /GEN=Zfp185 /FEA=FLmRNA /CNT=63 /TID=Mm.1161.1 /TIER=Stack /STK=41 /UG=Mm.1161 /LL=22673 /UG_TITLE=zinc finger protein 185 /DEF=Mus musculus 14 days embryo liver cDNA, RIKEN full-length enriched library, clone:4432415B19:zinc finger protein 185, full insert sequence. /FL=gb:U46687.1 gb:NM_009549.1
1421365_at	13.3127	3.73473	13.3127	up	215.408	16.1806	1.86736	-1.86736	Fst	14313	0000122 // negative regulation of transcription from RNA polymerase II promoter // not recorded///0002244 // hematopoietic progenitor cell differentiation // not recorded///0007276 // gamete generation // inferred from genetic interaction///0007389 // pattern specification process // inferred from mutant phenotype///0008585 // female gonad development // inferred from mutant phenotype///0030509 /…	0005576 // extracellular region // inferred from electronic annotation///0005634 // nucleus // inferred from direct assay///0005737 // cytoplasm // inferred from direct assay	0005515 // protein binding // inferred from electronic annotation///0043395 // heparan sulfate proteoglycan binding // not recorded///0048185 // activin binding // not recorded	chr13:114453343-114458949 (-) // 93.44 // qD2.2		2013-10-23	This probe set was annotated using the Matching Probes based pipeline to a Entrez Gene identifier using 6 transcripts. // false // Matching Probes // A	BC012655 // gb // 1 // Cross Hyb Matching Probes///GENSCAN00000000761 // ensembl // 6 // Cross Hyb Matching Probes	AK079916(10),AK083556(11),BC144926(11),BC145945(11),ENSMUST00000022287(11),NM_008046(11)	Mm.4913	chr13 D2.2|13	114458949	chr13	93.44	114453343	-		ENSMUSG00000021765		follistatin	Mouse Genome 430 2.0 Array	December 2011 (Mouse Genome Sequencing Consortium and NCBI 38)	GO:0000122|GO:0002244|GO:0007276|GO:0007389|GO:0008585|GO:0030509|GO:0031069|GO:0032926|GO:0042475|GO:0043616|GO:0045596|GO:0045596|GO:0051798|GO:0005576|GO:0005634|GO:0005737|GO:0005515|GO:0043395|GO:0048185	IPR002350 // Kazal domain // 1.3E-13///IPR002350 // Kazal domain // 6.8E-12///IPR002350 // Kazal domain // 4.5E-13///IPR015369 // Follistatin/Osteonectin EGF domain // 2.2E-12	95586		TGF_Beta_Signaling_Pathway // GenMAPP		NP_032072	NM_008046	NM_008046		GenBank	Consensus sequence		Mus musculus	Q8BNY0///P47931	gb:NM_008046.1 /DB_XREF=gi:6679866 /GEN=Fst /FEA=FLmRNA /CNT=8 /TID=Mm.4913.1 /TIER=FL /STK=2 /UG=Mm.4913 /LL=14313 /DEF=Mus musculus follistatin (Fst), mRNA. /PROD=follistatin /FL=gb:NM_008046.1
1421657_a_at	-23.5119	-4.55532	23.5119	down	37.9375	891.983	-2.27766	2.27766	Sox17	20671	0000122 // negative regulation of transcription from RNA polymerase II promoter // inferred from mutant phenotype///0001525 // angiogenesis // inferred from genetic interaction///0001570 // vasculogenesis // inferred from genetic interaction///0001706 // endoderm formation // not recorded///0001828 // inner cell mass cellular morphogenesis // inferred from mutant phenotype///0001947 // heart loop…	0005634 // nucleus // inferred from direct assay///0005634 // nucleus // not recorded///0005667 // transcription factor complex // not recorded	0003677 // DNA binding // inferred from direct assay///0003700 // sequence-specific DNA binding transcription factor activity // inferred from direct assay///0003705 // RNA polymerase II distal enhancer sequence-specific DNA binding transcription factor activity // inferred from direct assay///0003713 // transcription coactivator activity // inferred from direct assay///0005515 // protein binding…	chr1:4491712-4496363 (-) // 96.37 // qA1		2013-10-23	This probe set was annotated using the Matching Probes based pipeline to a Entrez Gene identifier using 7 transcripts. // false // Matching Probes // A		AK004781(11),AK076707(10),D49473(11),D49474(11),ENSMUST00000027035(11),ENSMUST00000116652(11),NM_011441(11)	Mm.5080	chr1 A1|1 1.65 cM	4496363	chr1	96.37	4491712	-		ENSMUSG00000025902		SRY-box containing gene 17	Mouse Genome 430 2.0 Array	December 2011 (Mouse Genome Sequencing Consortium and NCBI 38)	GO:0000122|GO:0001525|GO:0001570|GO:0001706|GO:0001828|GO:0001947|GO:0003142|GO:0003143|GO:0003151|GO:0003308|GO:0006351|GO:0006355|GO:0007283|GO:0007369|GO:0007492|GO:0007493|GO:0010628|GO:0016055|GO:0021903|GO:0023019|GO:0030178|GO:0030178|GO:0030308|GO:0031648|GO:0035050|GO:0042074|GO:0042661|GO:0042662|GO:0042789|GO:0045595|GO:0045597|GO:0045597|GO:0045732|GO:0045893|GO:0045944|GO:0045944|GO:…	IPR009071 // High mobility group (HMG) box domain // 8.1E-29///IPR021934 // Sox C-terminal transactivation domain // 1.0E-19///IPR021934 // Sox C-terminal transactivation domain // 1.7E-30	107543				NP_035571	NM_011441	NM_011441		GenBank	Consensus sequence		Mus musculus	Q61473///Q6P9T1	gb:NM_011441.1 /DB_XREF=gi:6755603 /GEN=Sox17 /FEA=FLmRNA /CNT=3 /TID=Mm.5080.1 /TIER=FL /STK=2 /UG=Mm.5080 /LL=20671 /DEF=Mus musculus SRY-box containing gene 17 (Sox17), mRNA. /PROD=SRY-box containing gene 17 /FL=gb:NM_011441.1 gb:D49474.1
1421806_at	-17.9206	-4.16355	17.9206	down	9.80594	175.728	-2.08177	2.08177	Defb3	27358	0006952 // defense response // inferred from electronic annotation///0042742 // defense response to bacterium // inferred from electronic annotation	0005576 // extracellular region // inferred from electronic annotation		chr8:19293363-19295338 (+) // 92.15 // qA1.3		2013-10-23	This probe set was annotated using the Matching Probes based pipeline to a Entrez Gene identifier using 7 transcripts. // false // Matching Probes // A		AF092929(11),BC114344(9),BC116176(9),BC116177(9),BC134358(9),ENSMUST00000033852(9),NM_013756(11)	Mm.103651	chr8|8	19295338	chr8	92.15	19293363	+		ENSMUSG00000039775		defensin beta 3	Mouse Genome 430 2.0 Array	December 2011 (Mouse Genome Sequencing Consortium and NCBI 38)	GO:0006952|GO:0042742|GO:0005576	IPR001855 // Beta defensin type // 6.8E-17	1351612				NP_038784	NM_013756	NM_013756		GenBank	Consensus sequence		Mus musculus	Q9WTL0	gb:NM_013756.1 /DB_XREF=gi:7304996 /GEN=Defb3 /FEA=FLmRNA /CNT=2 /TID=Mm.103651.1 /TIER=FL /STK=2 /UG=Mm.103651 /LL=27358 /DEF=Mus musculus defensin beta 3 (Defb3), mRNA. /PROD=defensin beta 3 /FL=gb:NM_013756.1 gb:AF092929.1
1422628_at	33.7264	5.07581	33.7264	up	392.481	11.6372	2.5379	-2.5379	Fam111a	107373	0006508 // proteolysis // inferred from electronic annotation///0008152 // metabolic process // inferred from electronic annotation///0045071 // negative regulation of viral genome replication // not recorded	0005634 // nucleus // not recorded///0005737 // cytoplasm // not recorded	0003723 // RNA binding // inferred from electronic annotation///0003724 // RNA helicase activity // inferred from electronic annotation///0003824 // catalytic activity // inferred from electronic annotation///0004252 // serine-type endopeptidase activity // inferred from electronic annotation///0005524 // ATP binding // inferred from electronic annotation	chr19:12573513-12589768 (+) // 96.62 // qA		2013-10-23	This probe set was annotated using the Matching Probes based pipeline to a Entrez Gene identifier using 5 transcripts. // false // Matching Probes // A	BC019638 // gb // 6 // Cross Hyb Matching Probes	BC038020(11),ENSMUST00000025595(11),ENSMUST00000144662(11),ENSMUST00000151307(11),NM_026640(11)	Mm.1643	chr19 B|19	12589768	chr19	96.62	12573513	+		ENSMUSG00000024691		family with sequence similarity 111, member A	Mouse Genome 430 2.0 Array	December 2011 (Mouse Genome Sequencing Consortium and NCBI 38)	GO:0006508|GO:0008152|GO:0045071|GO:0005634|GO:0005737|GO:0003723|GO:0003724|GO:0003824|GO:0004252|GO:0005524	IPR001254 // Peptidase S1 // 6.7E-9///IPR001254 // Peptidase S1 // 5.7E-9///IPR001850 // Flavivirus NS3, petidase S7 // 1.1E-8///IPR001850 // Flavivirus NS3, petidase S7 // 9.7E-9	1915508				NP_080916	NM_026640	NM_026640		GenBank	Consensus sequence		Mus musculus	Q9D2L9///D3YYD2///Q3UQF7	gb:NM_026640.1 /DB_XREF=gi:13386131 /GEN=4632417K18Rik /FEA=FLmRNA /CNT=79 /TID=Mm.1643.1 /TIER=FL+Stack /STK=24 /UG=Mm.1643 /LL=107373 /DEF=Mus musculus RIKEN cDNA 4632417K18 gene (4632417K18Rik), mRNA. /PROD=RIKEN cDNA 4632417K18 /FL=gb:NM_026640.1
1422672_at	-24.9486	-4.64088	24.9486	down	80.0448	1997	-2.32044	2.32044	Sprr1b	20754	0008360 // regulation of cell shape // traceable author statement///0018149 // peptide cross-linking // inferred from electronic annotation///0031424 // keratinization // inferred from electronic annotation	0001533 // cornified envelope // traceable author statement///0005737 // cytoplasm // inferred from electronic annotation	0005200 // structural constituent of cytoskeleton // traceable author statement	chr3:92436805-92438789 (-) // 99.64 // qF1		2013-10-23	This probe set was annotated using the Matching Probes based pipeline to a Entrez Gene identifier using 4 transcripts. // false // Matching Probes // A	BC119288 // gb // 8 // Cross Hyb Matching Probes///BC119290 // gb // 8 // Cross Hyb Matching Probes	AK003398(11),AK009752(11),ENSMUST00000062160(11),NM_009265(11)	Mm.140151	chr3 F1|3 40.14 cM	92438789	chr3	99.64	92436805	-		ENSMUSG00000048455		small proline-rich protein 1B	Mouse Genome 430 2.0 Array	December 2011 (Mouse Genome Sequencing Consortium and NCBI 38)	GO:0008360|GO:0018149|GO:0031424|GO:0001533|GO:0005737|GO:0005200	IPR003302 // Cornifin (SPRR1) // 1.0E-15///IPR003302 // Cornifin (SPRR1) // 1.0E-37	106659				NP_033291	NM_009265	NM_009265		GenBank	Consensus sequence		Mus musculus	Q62267	gb:NM_009265.1 /DB_XREF=gi:6678116 /GEN=Sprr1b /FEA=FLmRNA /CNT=26 /TID=Mm.140151.1 /TIER=FL+Stack /STK=20 /UG=Mm.140151 /LL=20754 /DEF=Mus musculus small proline-rich protein 1B (Sprr1b), mRNA. /PROD=small proline-rich protein 1B /FL=gb:NM_009265.1
1422933_at	116.931	6.86951	116.931	up	1896.86	16.222	3.43476	-3.43476	Xlr5a///Xlr5b///Xlr5c	27084///574438///627081				chrX:73151256-73158400 (+) // 99.05 // qA7.3///chrX:74652678-74659823 (+) // 94.21 // qA7.3///chrX:73108104-73115240 (-) // 95.92 // qA7.3///chrX:73283367-73290515 (-) // 96.02 // qA7.3///chrX:74822998-74830149 (-) // 94.4 // qA7.3		2013-10-23	This probe set was annotated using the Matching Probes based pipeline to a Entrez Gene identifier using 8 transcripts. // true // Matching Probes // A	BC119509 // gb // 2 // Cross Hyb Matching Probes///NM_031493 // refseq // 2 // Cross Hyb Matching Probes///GENSCAN00000026057 // ensembl // 2 // Cross Hyb Matching Probes///GENSCAN00000026068 // ensembl // 2 // Cross Hyb Matching Probes///GENSCAN00000026073 // ensembl // 4 // Cross Hyb Matching Probes///GENSCAN00000041839 // ensembl // 2 // Cross Hyb Matching Probes///GENSCAN00000041846 // ensemb…	NM_001111293(11),BC051681(11),NM_001045539(11),ENSMUST00000078574(11),ENSMUST00000114521(9),ENSMUST00000179600(11),ENSMUST00000114518(11),ENSMUST00000114503(10)	Mm.103726	chrX A7.2|X///chrX A7.3|X///chrX A7.3|X 37.29 cM	73158400	chrX	99.05	73151256	+		ENSMUSG00000058328///ENSMUSG00000067764///ENSMUSG00000072479		X-linked lymphocyte-regulated 5A///X-linked lymphocyte-regulated 5B///X-linked lymphocyte-regulated 5C	Mouse Genome 430 2.0 Array	December 2011 (Mouse Genome Sequencing Consortium and NCBI 38)		IPR006888 // Cor1/Xlr/Xmr family // 3.3E-25///IPR006888 // Cor1/Xlr/Xmr family // 3.0E-16///IPR006888 // Cor1/Xlr/Xmr family // 5.0E-26	3574108				NP_001039004///NP_001104763///NP_113681	NM_001045539///NM_001111293///NM_031493	NM_031493		GenBank	Consensus sequence		Mus musculus	Q80UK6///A2AIE6///A2BI50///A2BI45///A2BI46///A2BI49///Q9JJR2	gb:NM_031493.1 /DB_XREF=gi:13994145 /GEN=Xlr5 /FEA=FLmRNA /CNT=8 /TID=Mm.103726.1 /TIER=FL /STK=3 /UG=Mm.103726 /LL=27084 /DEF=Mus musculus X-linked lymphocyte-regulated 5 (Xlr5), mRNA. /PROD=X-linked lymphocyte-regulated 5 /FL=gb:NM_031493.1
1423467_at	-21.4874	-4.42542	21.4874	down	11.6934	251.261	-2.21271	2.21271	Ms4a4b	60361		0005887 // integral to plasma membrane // inferred from direct assay///0016021 // integral to membrane // inferred from electronic annotation		chr19:11443600-11463546 (+) // 96.1 // qA		2013-10-23	This probe set was annotated using the Matching Probes based pipeline to a Entrez Gene identifier using 11 transcripts. // false // Matching Probes // A	AK088780 // gb // 2 // Cross Hyb Matching Probes///ENSMUST00000145160 // ensembl // 2 // Cross Hyb Matching Probes	AF230640(11),AF237913(11),AK039824(11),AK088631(11),AK138737(11),AK172495(11),ENSMUST00000035258(11),ENSMUST00000123758(9),ENSMUST00000144135(9),ENSMUST00000152242(9),NM_021718(11)	Mm.33957	chr19 A|19	11463546	chr19	96.1	11443600	+		ENSMUSG00000056290		membrane-spanning 4-domains, subfamily A, member 4B	Mouse Genome 430 2.0 Array	December 2011 (Mouse Genome Sequencing Consortium and NCBI 38)	GO:0005887|GO:0016021	IPR007237 // CD20-like // 3.4E-34	1913083				NP_068364	NM_021718	BB199001		GenBank	Consensus sequence		Mus musculus	Q9ES61///Q8R046///Q91ZY5	gb:BB199001 /DB_XREF=gi:16271244 /DB_XREF=BB199001 /CLONE=A430010G10 /FEA=FLmRNA /CNT=42 /TID=Mm.33957.1 /TIER=Stack /STK=18 /UG=Mm.33957 /LL=60361 /UG_GENE=Ly116 /UG_TITLE=lymphocyte antigen 116 /FL=gb:AF237913.1 gb:NM_021718.1 gb:AF230640.1
1423756_s_at	33.6231	5.07138	33.6231	up	385.096	11.4533	2.53569	-2.53569	Igfbp4	16010	0001558 // regulation of cell growth // inferred from genetic interaction///0006954 // inflammatory response // inferred from electronic annotation///0010906 // regulation of glucose metabolic process // inferred from genetic interaction///0040008 // regulation of growth // inferred from genetic interaction///0043410 // positive regulation of MAPK cascade // inferred from genetic interaction///00…	0005576 // extracellular region // inferred from electronic annotation///0005615 // extracellular space // inferred from direct assay	0005520 // insulin-like growth factor binding // inferred from physical interaction///0019838 // growth factor binding // inferred from electronic annotation	chr11:99041244-99052655 (+) // 86.28 // qD		2013-10-23	This probe set was annotated using the Matching Probes based pipeline to a Entrez Gene identifier using 7 transcripts. // false // Matching Probes // A		AK003243(11),AK031212(11),AK150229(11),AK165688(11),BC019836(11),ENSMUST00000017637(11),NM_010517(11)	Mm.22248	chr11 D|11	99052655	chr11	86.28	99041244	+		ENSMUSG00000017493		insulin-like growth factor binding protein 4	Mouse Genome 430 2.0 Array	December 2011 (Mouse Genome Sequencing Consortium and NCBI 38)	GO:0001558|GO:0006954|GO:0010906|GO:0040008|GO:0043410|GO:0043568|GO:0044342|GO:0005576|GO:0005615|GO:0005520|GO:0019838	IPR000716 // Thyroglobulin type-1 // 5.1E-24///IPR000867 // Insulin-like growth factor-binding protein, IGFBP // 1.8E-14	96439		Smooth_muscle_contraction // GenMAPP		NP_034647	NM_010517	BC019836		GenBank	Consensus sequence		Mus musculus	Q8BSM9///P47879	gb:BC019836.1 /DB_XREF=gi:18043722 /FEA=FLmRNA /CNT=420 /TID=Mm.22248.2 /TIER=FL+Stack /STK=125 /UG=Mm.22248 /LL=16010 /UG_GENE=Igfbp4 /DEF=Mus musculus, insulin-like growth factor binding protein 4, clone MGC:29917 IMAGE:5123738, mRNA, complete cds. /PROD=insulin-like growth factor binding protein 4 /FL=gb:BC019836.1
1424099_at	13.8854	3.7955	13.8854	up	280.938	20.2326	1.89775	-1.89775	Gpx8	69590	0006979 // response to oxidative stress // inferred from electronic annotation///0055114 // oxidation-reduction process // inferred from electronic annotation	0016020 // membrane // inferred from electronic annotation///0016021 // integral to membrane // inferred from electronic annotation	0004601 // peroxidase activity // inferred from electronic annotation///0004602 // glutathione peroxidase activity // inferred from electronic annotation///0016209 // antioxidant activity // inferred from electronic annotation///0016491 // oxidoreductase activity // inferred from electronic annotation	chr13:113042752-113046412 (-) // 97.77 // qD2.2		2013-10-23	This probe set was annotated using the Matching Probes based pipeline to a Entrez Gene identifier using 4 transcripts. // false // Matching Probes // A		AK009378(11),BC019664(11),ENSMUST00000022282(11),NM_027127(11)	Mm.12715	chr13 D2.2|13	113046412	chr13	97.77	113042752	-	EC:1.11.1.9	ENSMUSG00000021760		glutathione peroxidase 8 (putative)	Mouse Genome 430 2.0 Array	December 2011 (Mouse Genome Sequencing Consortium and NCBI 38)	GO:0006979|GO:0055114|GO:0016020|GO:0016021|GO:0004601|GO:0004602|GO:0016209|GO:0016491	IPR000866 // Alkyl hydroperoxide reductase subunit C/ Thiol specific antioxidant // 1.1E-10///IPR000889 // Glutathione peroxidase // 5.9E-38	1916840				NP_081403	NM_027127	BC019664		GenBank	Consensus sequence		Mus musculus	Q9D7B7	gb:BC019664.1 /DB_XREF=gi:18044309 /FEA=FLmRNA /CNT=67 /TID=Mm.12715.1 /TIER=FL+Stack /STK=54 /UG=Mm.12715 /LL=69590 /UG_GENE=2310016C16Rik /DEF=Mus musculus, RIKEN cDNA 2310016C16 gene, clone MGC:30772 IMAGE:3988837, mRNA, complete cds. /PROD=RIKEN cDNA 2310016C16 gene /FL=gb:BC019664.1
1424338_at	-10.993	-3.45851	10.993	down	20.8977	229.729	-1.72926	1.72926	Slc6a13	14412	0006810 // transport // inferred from electronic annotation///0006836 // neurotransmitter transport // inferred from electronic annotation///0006836 // neurotransmitter transport // not recorded	0005886 // plasma membrane // inferred from electronic annotation///0005887 // integral to plasma membrane // inferred from electronic annotation///0016020 // membrane // inferred from electronic annotation///0016021 // integral to membrane // inferred from electronic annotation	0005328 // neurotransmitter:sodium symporter activity // inferred from electronic annotation///0005332 // gamma-aminobutyric acid:sodium symporter activity // not recorded///0015293 // symporter activity // inferred from electronic annotation///0042165 // neurotransmitter binding // not recorded	chr6:121302694-121337721 (+) // 96.37 // qF1		2013-10-23	This probe set was annotated using the Matching Probes based pipeline to a Entrez Gene identifier using 5 transcripts. // false // Matching Probes // A	GENSCAN00000035042 // ensembl // 3 // Cross Hyb Matching Probes	AK149557(11),BC023117(11),BC029637(11),ENSMUST00000064580(11),NM_144512(11)	Mm.25180	chr6 F1|6	121337721	chr6	96.37	121302694	+		ENSMUSG00000030108		solute carrier family 6 (neurotransmitter transporter, GABA), member 13	Mouse Genome 430 2.0 Array	December 2011 (Mouse Genome Sequencing Consortium and NCBI 38)	GO:0006810|GO:0006836|GO:0006836|GO:0005886|GO:0005887|GO:0016020|GO:0016021|GO:0005328|GO:0005332|GO:0015293|GO:0042165	IPR000175 // Sodium:neurotransmitter symporter // 1.8E-253	95629				NP_653095	NM_144512	BC023117		GenBank	Consensus sequence		Mus musculus	Q3UEF3///P31649///Q8VC78///Q8CF74	gb:BC023117.1 /DB_XREF=gi:18605685 /FEA=FLmRNA /CNT=67 /TID=Mm.25180.1 /TIER=FL+Stack /STK=37 /UG=Mm.25180 /DEF=Mus musculus, Similar to solute carrier family 6 (neurotransmitter transporter, GABA), member 13, clone MGC:28956 IMAGE:4240641, mRNA, complete cds. /PROD=Similar to solute carrier family 6(neurotransmitter transporter, GABA), member 13 /FL=gb:BC023117.1
1426615_s_at	-18.8763	-4.2385	18.8763	down	135.716	2561.82	-2.11925	2.11925	Ndrg4	234593		0005737 // cytoplasm // inferred from electronic annotation///0005829 // cytosol // inferred from electronic annotation		chr8:95703053-95715119 (+) // 94.0 // qD1		2013-10-23	This probe set was annotated using the Matching Probes based pipeline to a Entrez Gene identifier using 10 transcripts. // false // Matching Probes // A		AK090374(11),AK144294(11),AK168873(11),BC006595(11),ENSMUST00000041318(11),ENSMUST00000073139(11),ENSMUST00000080666(11),ENSMUST00000166358(11),NM_001195006(11),NM_145602(11)	Mm.29846	chr8 D1|8	95715119	chr8	94	95703053	+		ENSMUSG00000036564		N-myc downstream regulated gene 4	Mouse Genome 430 2.0 Array	December 2011 (Mouse Genome Sequencing Consortium and NCBI 38)	GO:0005737|GO:0005829	IPR004142 // Ndr // 6.3E-128///IPR004142 // Ndr // 4.0E-128///IPR004142 // Ndr // 2.0E-128	2384590				NP_001181935///NP_663577	NM_001195006///NM_145602	AV006122		GenBank	Consensus sequence		Mus musculus	Q8BTG7///E9Q168///E0CZ50	gb:AV006122 /DB_XREF=gi:4782972 /DB_XREF=AV006122 /CLONE=1020006I03 /FEA=FLmRNA /CNT=133 /TID=Mm.29846.1 /TIER=Stack /STK=9 /UG=Mm.29846 /UG_TITLE=Mus musculus, Similar to NDRG family, member 4, clone MGC:7067 IMAGE:3156802, mRNA, complete cds /FL=gb:BC006595.1
1427660_x_at	-28.9283	-4.85441	28.9283	down	18.7231	541.628	-2.42721	2.4272	Igk-V28///Igkc///Igkj1///Igkv4-53///Igkv6-23///Igkv8-30	16071///16114///110759///384419///546213///637227	0030183 // B cell differentiation // inferred from mutant phenotype///0032496 // response to lipopolysaccharide // inferred from direct assay///0042493 // response to drug // inferred from direct assay		0003823 // antigen binding // inferred from electronic annotation	chr6:70573043-70726960 (+) // 58.23 // qC1		2013-10-23	This probe set was annotated using the Matching Probes based pipeline to a Entrez Gene identifier using 8 transcripts. // true // Matching Probes // A	n295815 // noncode // 6 // Cross Hyb Matching Probes///AK008450 // gb // 6 // Cross Hyb Matching Probes///AM745100 // gb // 5 // Cross Hyb Matching Probes///L02347 // gb // 3 // Cross Hyb Matching Probes///X13187 // gb // 5 // Cross Hyb Matching Probes	BC100400(11),BC106160(11),BC106172(11),AB097848(11),AB453397(11),AB538878(11),AF466768(11),AF466770(11),AJ555479(11),BC002035(11),BC002112(11),BC006643(11),BC013496(11),BC015292(11),BC019474(11),BC019760(11),BC021781(11),BC027418(11),BC028540(11),BC028925(11),BC031498(11),BC055906(11),BC055911(11),BC080787(11),BC084683(11),BC091750(11),BC091754(11),BC092251(11),BC094013(11),BC094049(11),BC106159(…	Mm.104747	chr6 C1|6///chr6 C|6 32.04 cM	70726960	chr6	58.23	70573043	+				immunoglobulin kappa chain variable 28 (V28)///immunoglobulin kappa constant///immunoglobulin kappa joining 1///immunoglobulin kappa variable 4-53///immunoglobulin kappa variable 6-23///immunoglobulin kappa chain variable 8-30	Mouse Genome 430 2.0 Array	December 2011 (Mouse Genome Sequencing Consortium and NCBI 38)	GO:0030183|GO:0032496|GO:0042493|GO:0003823		96495///96511///1316689///2686266///3642250///3711980						BC013496		GenBank	Consensus sequence		Mus musculus	I6L958///I6L971///I6L978///I6L991///I6L998///I6L9E1///I6L9E2///Q66JS7///Q5XFY8///Q58EU8///Q52L95///Q52L64///A0A5E3///Q7TS98///P01634///P01665///A2MY50///A2NC20///A2NHM3///A2P1G9///B5DC72///B5UB61///B5UB63///B5UB65///Q5F2I0///Q5F2I7///Q65ZC0///Q65ZN3///Q811U6///Q925S0///Q9JL80	gb:BC013496.1 /DB_XREF=gi:15488700 /FEA=mRNA /CNT=2 /TID=Mm.104747.19 /TIER=ConsEnd /STK=0 /UG=Mm.104747 /LL=16114 /UG_GENE=Igk-V28 /DEF=Mus musculus, clone IMAGE:4219618, mRNA, partial cds. /PROD=Unknown (protein for IMAGE:4219618)
1427960_at	-16.1134	-4.01019	16.1134	down	208.747	3363.63	-2.0051	2.00509	Ugt2b34	100727	0005975 // carbohydrate metabolic process // inferred from electronic annotation///0008152 // metabolic process // inferred from electronic annotation///0030259 // lipid glycosylation // inferred from electronic annotation		0016740 // transferase activity // inferred from electronic annotation///0016757 // transferase activity, transferring glycosyl groups // inferred from electronic annotation///0016758 // transferase activity, transferring hexosyl groups // inferred from electronic annotation///0030246 // carbohydrate binding // inferred from electronic annotation	chr5:86889761-86906959 (-) // 87.29 // qE1		2013-10-23	This probe set was annotated using the Matching Probes based pipeline to a Entrez Gene identifier using 5 transcripts. // false // Matching Probes // A		AK145951(11),BC028826(11),ENSMUST00000031181(11),ENSMUST00000113333(11),NM_153598(11)	Mm.221171	chr5 E1|5	86906959	chr5	87.29	86889761	-	EC:2.4.1.17	ENSMUSG00000029260		UDP glucuronosyltransferase 2 family, polypeptide B34	Mouse Genome 430 2.0 Array	December 2011 (Mouse Genome Sequencing Consortium and NCBI 38)	GO:0005975|GO:0008152|GO:0030259|GO:0016740|GO:0016757|GO:0016758|GO:0030246	IPR002213 // UDP-glucuronosyl/UDP-glucosyltransferase // 9.7E-252///IPR002213 // UDP-glucuronosyl/UDP-glucosyltransferase // 2.7E-191///IPR007235 // Glycosyl transferase, family 28, C-terminal // 7.2E-11///IPR007235 // Glycosyl transferase, family 28, C-terminal // 3.8E-10	2140962				NP_705826	NM_153598	BC028826		GenBank	Consensus sequence		Mus musculus	Q3UKM2///Q8K154///E9PZ30	gb:BC028826.1 /DB_XREF=gi:20380045 /FEA=mRNA /CNT=31 /TID=Mm.221171.1 /TIER=Stack /STK=11 /UG=Mm.221171 /DEF=Mus musculus, Similar to UDP glycosyltransferase 2 family, polypeptide B4, clone MGC:37823 IMAGE:5098890, mRNA, complete cds. /PROD=Similar to UDP glycosyltransferase 2 family,polypeptide B4
1427961_s_at	-15.5465	-3.95851	15.5465	down	199.829	3106.64	-1.97926	1.97926	Ugt2b34	100727	0005975 // carbohydrate metabolic process // inferred from electronic annotation///0008152 // metabolic process // inferred from electronic annotation///0030259 // lipid glycosylation // inferred from electronic annotation		0016740 // transferase activity // inferred from electronic annotation///0016757 // transferase activity, transferring glycosyl groups // inferred from electronic annotation///0016758 // transferase activity, transferring hexosyl groups // inferred from electronic annotation///0030246 // carbohydrate binding // inferred from electronic annotation	chr5:86889761-86906959 (-) // 87.29 // qE1		2013-10-23	This probe set was annotated using the Matching Probes based pipeline to a Entrez Gene identifier using 5 transcripts. // false // Matching Probes // A		AK145951(11),BC028826(11),ENSMUST00000031181(11),ENSMUST00000113333(11),NM_153598(11)	Mm.221171	chr5 E1|5	86906959	chr5	87.29	86889761	-	EC:2.4.1.17	ENSMUSG00000029260		UDP glucuronosyltransferase 2 family, polypeptide B34	Mouse Genome 430 2.0 Array	December 2011 (Mouse Genome Sequencing Consortium and NCBI 38)	GO:0005975|GO:0008152|GO:0030259|GO:0016740|GO:0016757|GO:0016758|GO:0030246	IPR002213 // UDP-glucuronosyl/UDP-glucosyltransferase // 9.7E-252///IPR002213 // UDP-glucuronosyl/UDP-glucosyltransferase // 2.7E-191///IPR007235 // Glycosyl transferase, family 28, C-terminal // 7.2E-11///IPR007235 // Glycosyl transferase, family 28, C-terminal // 3.8E-10	2140962				NP_705826	NM_153598	BC028826		GenBank	Consensus sequence		Mus musculus	Q3UKM2///Q8K154///E9PZ30	gb:BC028826.1 /DB_XREF=gi:20380045 /FEA=mRNA /CNT=31 /TID=Mm.221171.1 /TIER=Stack /STK=11 /UG=Mm.221171 /DEF=Mus musculus, Similar to UDP glycosyltransferase 2 family, polypeptide B4, clone MGC:37823 IMAGE:5098890, mRNA, complete cds. /PROD=Similar to UDP glycosyltransferase 2 family,polypeptide B4
1428379_at	-11.19	-3.48414	11.19	down	12.5146	140.038	-1.74207	1.74207	Slc17a6	140919	0001504 // neurotransmitter uptake // inferred from direct assay///0003333 // amino acid transmembrane transport // inferred from direct assay///0006810 // transport // inferred from electronic annotation///0006811 // ion transport // inferred from electronic annotation///0006814 // sodium ion transport // inferred from electronic annotation///0006836 // neurotransmitter transport // inferred fro…	0005769 // early endosome // not recorded///0008021 // synaptic vesicle // inferred from direct assay///0016020 // membrane // inferred from electronic annotation///0016021 // integral to membrane // inferred from electronic annotation///0030054 // cell junction // inferred from electronic annotation///0030672 // synaptic vesicle membrane // inferred from electronic annotation///0031410 // cytopl…	0005313 // L-glutamate transmembrane transporter activity // inferred from direct assay///0005313 // L-glutamate transmembrane transporter activity // not recorded///0015293 // symporter activity // inferred from electronic annotation	chr7:51669598-51671126 (+) // 99.28 // qB4		2013-10-23	This probe set was annotated using the Matching Probes based pipeline to a Entrez Gene identifier using 5 transcripts. // false // Matching Probes // A		AK013772(11),AK045409(11),BC038375(9),ENSMUST00000032710(11),NM_080853(11)	Mm.70945	chr7 B5|7	51671126	chr7	99.28	51669598	+		ENSMUSG00000030500		solute carrier family 17 (sodium-dependent inorganic phosphate cotransporter), member 6	Mouse Genome 430 2.0 Array	December 2011 (Mouse Genome Sequencing Consortium and NCBI 38)	GO:0001504|GO:0003333|GO:0006810|GO:0006811|GO:0006814|GO:0006836|GO:0015807|GO:0015813|GO:0015813|GO:0055085|GO:0005769|GO:0008021|GO:0016020|GO:0016021|GO:0030054|GO:0030672|GO:0031410|GO:0043005|GO:0045202|GO:0005313|GO:0005313|GO:0015293	IPR011701 // Major facilitator superfamily // 1.2E-50	2156052				NP_543129	NM_080853	BQ180367		GenBank	Consensus sequence		Mus musculus	Q8BLE7	gb:BQ180367 /DB_XREF=gi:20355846 /DB_XREF=UI-M-EX0-bxb-e-14-0-UI.r1 /CLONE=IMAGE:5705845 /FEA=mRNA /CNT=58 /TID=Mm.70945.2 /TIER=Stack /STK=47 /UG=Mm.70945 /LL=140919 /UG_GENE=Slc17a6 /UG_TITLE=solute carrier family 17 (vesicular glutamate transporter), member 6
1429177_x_at	-82.0072	-6.35768	82.0072	down	17.0961	1402	-3.17884	3.17884	Sox17	20671	0000122 // negative regulation of transcription from RNA polymerase II promoter // inferred from mutant phenotype///0001525 // angiogenesis // inferred from genetic interaction///0001570 // vasculogenesis // inferred from genetic interaction///0001706 // endoderm formation // not recorded///0001828 // inner cell mass cellular morphogenesis // inferred from mutant phenotype///0001947 // heart loop…	0005634 // nucleus // inferred from direct assay///0005634 // nucleus // not recorded///0005667 // transcription factor complex // not recorded	0003677 // DNA binding // inferred from direct assay///0003700 // sequence-specific DNA binding transcription factor activity // inferred from direct assay///0003705 // RNA polymerase II distal enhancer sequence-specific DNA binding transcription factor activity // inferred from direct assay///0003713 // transcription coactivator activity // inferred from direct assay///0005515 // protein binding…	chr1:4490927-4496413 (-) // 99.23 // qA1		2013-10-23	This probe set was annotated using the Matching Probes based pipeline to a Entrez Gene identifier using 3 transcripts. // false // Matching Probes // A	AK076707 // gb // 5 // Cross Hyb Matching Probes///D49473 // gb // 8 // Cross Hyb Matching Probes	AK004781(11),ENSMUST00000027035(11),NM_011441(11)	Mm.5080	chr1 A1|1 1.65 cM	4496413	chr1	99.23	4490927	-		ENSMUSG00000025902		SRY-box containing gene 17	Mouse Genome 430 2.0 Array	December 2011 (Mouse Genome Sequencing Consortium and NCBI 38)	GO:0000122|GO:0001525|GO:0001570|GO:0001706|GO:0001828|GO:0001947|GO:0003142|GO:0003143|GO:0003151|GO:0003308|GO:0006351|GO:0006355|GO:0007283|GO:0007369|GO:0007492|GO:0007493|GO:0010628|GO:0016055|GO:0021903|GO:0023019|GO:0030178|GO:0030178|GO:0030308|GO:0031648|GO:0035050|GO:0042074|GO:0042661|GO:0042662|GO:0042789|GO:0045595|GO:0045597|GO:0045597|GO:0045732|GO:0045893|GO:0045944|GO:0045944|GO:…	IPR009071 // High mobility group (HMG) box domain // 8.1E-29///IPR021934 // Sox C-terminal transactivation domain // 1.0E-19///IPR021934 // Sox C-terminal transactivation domain // 1.7E-30	107543				NP_035571	NM_011441	AK004781		GenBank	Consensus sequence		Mus musculus	Q61473///Q6P9T1	gb:AK004781.1 /DB_XREF=gi:12836219 /GEN=Sox17 /FEA=mRNA /CNT=16 /TID=Mm.5080.3 /TIER=Stack /STK=10 /UG=Mm.5080 /LL=20671 /UG_TITLE=SRY-box containing gene 17 /DEF=Mus musculus adult male lung cDNA, RIKEN full-length enriched library, clone:1200015E04:SRY-box containing gene 17, full insert sequence.
1429830_a_at	-15.0672	-3.91334	15.0672	down	31.5114	474.787	-1.95667	1.95667	Cd59a	12509	0001971 // negative regulation of activation of membrane attack complex // inferred from mutant phenotype///0016525 // negative regulation of angiogenesis // inferred from mutant phenotype///0030948 // negative regulation of vascular endothelial growth factor receptor signaling pathway // inferred from mutant phenotype///0045916 // negative regulation of complement activation // inferred from dir…	0005886 // plasma membrane // inferred from electronic annotation///0009897 // external side of plasma membrane // inferred from direct assay///0016020 // membrane // inferred from electronic annotation///0031225 // anchored to membrane // inferred from electronic annotation		chr2:104095833-104114312 (+) // 92.26 // qE2		2013-10-23	This probe set was annotated using the Matching Probes based pipeline to a Entrez Gene identifier using 10 transcripts. // false // Matching Probes // A	BC038128 // gb // 1 // Cross Hyb Matching Probes///BC132089 // gb // 8 // Cross Hyb Matching Probes///BC132115 // gb // 8 // Cross Hyb Matching Probes///NM_181858 // refseq // 1 // Cross Hyb Matching Probes///ENSMUST00000111131 // ensembl // 1 // Cross Hyb Matching Probes///ENSMUST00000111132 // ensembl // 1 // Cross Hyb Matching Probes	AK002743(11),AK005507(11),AK018136(11),AK080728(11),ENSMUST00000040423(11),ENSMUST00000153312(11),ENSMUST00000168176(10),NM_001111060(10),NM_007652(11),U60473(11)	Mm.8457	chr2|2 54.53 cM	104114312	chr2	92.26	104095833	+		ENSMUSG00000032679		CD59a antigen	Mouse Genome 430 2.0 Array	December 2011 (Mouse Genome Sequencing Consortium and NCBI 38)	GO:0001971|GO:0016525|GO:0030948|GO:0045916|GO:0090272|GO:0005886|GO:0009897|GO:0016020|GO:0031225	IPR001526 // CD59 antigen // 1.8E-15	109177				NP_001104530///NP_031678	NM_001111060///NM_007652	AK005507		GenBank	Consensus sequence		Mus musculus	O55186///A2BI31	gb:AK005507.1 /DB_XREF=gi:12838111 /GEN=Cd59a /FEA=mRNA /CNT=18 /TID=Mm.8457.2 /TIER=ConsEnd /STK=7 /UG=Mm.8457 /LL=12509 /UG_TITLE=CD59a antigen /DEF=Mus musculus adult female placenta cDNA, RIKEN full-length enriched library, clone:1600021C10:CD59a antigen, full insert sequence.
1433956_at	34.4808	5.10772	34.4808	up	635.614	18.4339	2.55386	-2.55386	Cdh5	12562	0001955 // blood vessel maturation // inferred from mutant phenotype///0007155 // cell adhesion // inferred from electronic annotation///0007156 // homophilic cell adhesion // inferred from electronic annotation///0008285 // negative regulation of cell proliferation // inferred from genetic interaction///0016337 // cell-cell adhesion // inferred by curator///0016337 // cell-cell adhesion // infer…	0005886 // plasma membrane // inferred from electronic annotation///0005911 // cell-cell junction // inferred from direct assay///0005911 // cell-cell junction // not recorded///0005923 // tight junction // inferred from direct assay///0016020 // membrane // inferred from electronic annotation///0016021 // integral to membrane // inferred from electronic annotation///0030054 // cell junction // i…	0005102 // receptor binding // not recorded///0005509 // calcium ion binding // inferred from electronic annotation///0005515 // protein binding // inferred from physical interaction///0008013 // beta-catenin binding // not recorded///0019903 // protein phosphatase binding // inferred from physical interaction///0044325 // ion channel binding // not recorded///0046872 // metal ion binding // infe…	chr8:104112891-104144501 (+) // 96.53 // qD3		2013-10-23	This probe set was annotated using the Matching Probes based pipeline to a Entrez Gene identifier using 5 transcripts. // false // Matching Probes // A		AK164474(11),AK167620(11),BC054790(11),ENSMUST00000034339(11),NM_009868(11)	Mm.135114	chr8 D3|8 53.04 cM	104144501	chr8	96.53	104112891	+		ENSMUSG00000031871		cadherin 5	Mouse Genome 430 2.0 Array	December 2011 (Mouse Genome Sequencing Consortium and NCBI 38)	GO:0001955|GO:0007155|GO:0007156|GO:0008285|GO:0016337|GO:0016337|GO:2000114|GO:2000114|GO:0005886|GO:0005911|GO:0005911|GO:0005923|GO:0016020|GO:0016021|GO:0030054|GO:0071944|GO:0005102|GO:0005509|GO:0005515|GO:0008013|GO:0019903|GO:0044325|GO:0046872	IPR000233 // Cadherin, cytoplasmic domain // 2.4E-48///IPR002126 // Cadherin // 1.1E-11///IPR002126 // Cadherin // 7.6E-20///IPR002126 // Cadherin // 7.4E-24///IPR002126 // Cadherin // 1.1E-18///IPR002126 // Cadherin // 4.0E-14	105057				NP_033998	NM_009868	AW543698		GenBank	Consensus sequence		Mus musculus	Q3TJ23///P55284	gb:AW543698 /DB_XREF=gi:7186115 /DB_XREF=C0173A11-3 /CLONE=C0173A11 /FEA=EST /CNT=70 /TID=Mm.135114.1 /TIER=Stack /STK=49 /UG=Mm.135114 /LL=101933 /UG_GENE=AA408225 /UG_TITLE=expressed sequence AA408225
1434436_at	20.8109	4.37927	20.8109	up	314.104	15.0933	2.18963	-2.18963	Morc4	75746		0005634 // nucleus // inferred from electronic annotation	0005515 // protein binding // inferred from electronic annotation///0005524 // ATP binding // inferred from electronic annotation///0008270 // zinc ion binding // inferred from electronic annotation///0046872 // metal ion binding // inferred from electronic annotation	chrX:139821634-139834510 (-) // 99.21 // qF1		2013-10-23	This probe set was annotated using the Matching Probes based pipeline to a Entrez Gene identifier using 6 transcripts. // false // Matching Probes // A		BC098483(11),ENSMUST00000033811(11),ENSMUST00000087401(11),ENSMUST00000136415(11),NM_001193309(11),NM_029413(11)	Mm.2917	chrX F1|X	139834510	chrX	99.21	139821634	-		ENSMUSG00000031434		microrchidia 4	Mouse Genome 430 2.0 Array	December 2011 (Mouse Genome Sequencing Consortium and NCBI 38)	GO:0005634|GO:0005515|GO:0005524|GO:0008270|GO:0046872	IPR003594 // Histidine kinase-like ATPase, ATP-binding domain // 4.3E-12///IPR003594 // Histidine kinase-like ATPase, ATP-binding domain // 4.6E-12///IPR011124 // Zinc finger, CW-type // 1.1E-21///IPR011124 // Zinc finger, CW-type // 3.8E-22	1922996				NP_001180238///NP_083689	NM_001193309///NM_029413	AV036158		GenBank	Consensus sequence		Mus musculus	Q8BMD7///F6WD71///Q3TVG7///E9Q112///A2RSL2	gb:AV036158 /DB_XREF=gi:16356612 /DB_XREF=AV036158 /CLONE=1600017G11 /FEA=EST /CNT=61 /TID=Mm.2917.1 /TIER=Stack /STK=32 /UG=Mm.2917 /UG_TITLE=ESTs
1436188_a_at	-19.8097	-4.30814	19.8097	down	117.916	2335.88	-2.15407	2.15407	Ndrg4	234593		0005737 // cytoplasm // inferred from electronic annotation///0005829 // cytosol // inferred from electronic annotation		chr8:95714479-95714956 (+) // 87.3 // qD1		2013-10-23	This probe set was annotated using the Matching Probes based pipeline to a Entrez Gene identifier using 9 transcripts. // false // Matching Probes // A	BC006595 // gb // 7 // Cross Hyb Matching Probes///GENSCAN00000039103 // ensembl // 4 // Cross Hyb Matching Probes	AK090374(10),AK144294(11),AK168873(11),ENSMUST00000041318(11),ENSMUST00000073139(11),ENSMUST00000080666(11),ENSMUST00000166358(11),NM_001195006(11),NM_145602(11)	Mm.29846	chr8 D1|8	95714956	chr8	87.3	95714479	+		ENSMUSG00000036564		N-myc downstream regulated gene 4	Mouse Genome 430 2.0 Array	December 2011 (Mouse Genome Sequencing Consortium and NCBI 38)	GO:0005737|GO:0005829	IPR004142 // Ndr // 6.3E-128///IPR004142 // Ndr // 4.0E-128///IPR004142 // Ndr // 2.0E-128	2384590				NP_001181935///NP_663577	NM_001195006///NM_145602	AI837704		GenBank	Consensus sequence		Mus musculus	Q8BTG7///E9Q168///E0CZ50	gb:AI837704 /DB_XREF=gi:5471917 /DB_XREF=UI-M-AK0-adj-e-01-0-UI.s1 /CLONE=UI-M-AK0-adj-e-01-0-UI /FEA=EST /CNT=16 /TID=Mm.29846.2 /TIER=Stack /STK=10 /UG=Mm.29846 /UG_TITLE=Mus musculus, Similar to NDRG family, member 4, clone MGC:7067 IMAGE:3156802, mRNA, complete cds
1436993_x_at	15.7394	3.97631	15.7394	up	415.999	26.4304	1.98815	-1.98815	Pfn2	18645	0007010 // cytoskeleton organization // inferred from electronic annotation///0030036 // actin cytoskeleton organization // inferred from electronic annotation///0030833 // regulation of actin filament polymerization // not recorded///0030837 // negative regulation of actin filament polymerization // inferred from direct assay///0030838 // positive regulation of actin filament polymerization // i…	0005737 // cytoplasm // inferred from electronic annotation///0005856 // cytoskeleton // inferred from electronic annotation///0015629 // actin cytoskeleton // inferred from electronic annotation///0043195 // terminal bouton // inferred from direct assay	0003779 // actin binding // not recorded///0005515 // protein binding // inferred from physical interaction	chr3:57841895-57842204 (-) // 91.21 // qD		2013-10-23	This probe set was annotated using the Matching Probes based pipeline to a Entrez Gene identifier using 6 transcripts. // false // Matching Probes // A		AK132651(11),AK164145(11),BC024363(11),ENSMUST00000066882(11),ENSMUST00000119344(11),NM_019410(11)	Mm.20399	chr3 D|3 28.15 cM	57842204	chr3	91.21	57841895	-		ENSMUSG00000027805		profilin 2	Mouse Genome 430 2.0 Array	December 2011 (Mouse Genome Sequencing Consortium and NCBI 38)	GO:0007010|GO:0030036|GO:0030833|GO:0030837|GO:0030838|GO:2000300|GO:0005737|GO:0005856|GO:0015629|GO:0043195|GO:0003779|GO:0005515		97550				NP_062283	NM_019410	BB560492		GenBank	Consensus sequence		Mus musculus	Q9JJV2	gb:BB560492 /DB_XREF=gi:9646858 /DB_XREF=BB560492 /CLONE=E530111B09 /FEA=EST /CNT=33 /TID=Mm.20399.2 /TIER=Stack /STK=31 /UG=Mm.20399 /LL=18645 /UG_GENE=Pfn2 /UG_TITLE=profilin 2
1437405_a_at	12.5305	3.64737	12.5305	up	782.582	62.4543	1.82368	-1.82368	Igfbp4	16010	0001558 // regulation of cell growth // inferred from genetic interaction///0006954 // inflammatory response // inferred from electronic annotation///0010906 // regulation of glucose metabolic process // inferred from genetic interaction///0040008 // regulation of growth // inferred from genetic interaction///0043410 // positive regulation of MAPK cascade // inferred from genetic interaction///00…	0005576 // extracellular region // inferred from electronic annotation///0005615 // extracellular space // inferred from direct assay	0005520 // insulin-like growth factor binding // inferred from physical interaction///0019838 // growth factor binding // inferred from electronic annotation	chr11:99052174-99052625 (+) // 60.55 // qD		2013-10-23	This probe set was annotated using the Matching Probes based pipeline to a Entrez Gene identifier using 7 transcripts. // false // Matching Probes // A		AK003243(11),AK031212(11),AK150229(11),AK165688(11),BC019836(11),ENSMUST00000017637(11),NM_010517(11)	Mm.22248	chr11 D|11	99052625	chr11	60.55	99052174	+		ENSMUSG00000017493		insulin-like growth factor binding protein 4	Mouse Genome 430 2.0 Array	December 2011 (Mouse Genome Sequencing Consortium and NCBI 38)	GO:0001558|GO:0006954|GO:0010906|GO:0040008|GO:0043410|GO:0043568|GO:0044342|GO:0005576|GO:0005615|GO:0005520|GO:0019838	IPR000716 // Thyroglobulin type-1 // 5.1E-24///IPR000867 // Insulin-like growth factor-binding protein, IGFBP // 1.8E-14	96439		Smooth_muscle_contraction // GenMAPP		NP_034647	NM_010517	BB787243		GenBank	Consensus sequence		Mus musculus	Q8BSM9///P47879	gb:BB787243 /DB_XREF=gi:16955739 /DB_XREF=BB787243 /CLONE=G430115L10 /FEA=EST /CNT=23 /TID=Mm.22248.4 /TIER=Stack /STK=18 /UG=Mm.22248 /LL=16010 /UG_GENE=Igfbp4 /UG_TITLE=insulin-like growth factor binding protein 4
1448124_at	10.1842	3.34826	10.1842	up	171.363	16.8264	1.67413	-1.67413	Gusb	110006	0005975 // carbohydrate metabolic process // inferred from direct assay///0008152 // metabolic process // inferred from electronic annotation	0005764 // lysosome // inferred from direct assay///0005764 // lysosome // not recorded///0005783 // endoplasmic reticulum // inferred from electronic annotation///0043231 // intracellular membrane-bounded organelle // not recorded	0003824 // catalytic activity // inferred from electronic annotation///0004553 // hydrolase activity, hydrolyzing O-glycosyl compounds // inferred from electronic annotation///0004566 // beta-glucuronidase activity // inferred from direct assay///0004566 // beta-glucuronidase activity // not recorded///0016787 // hydrolase activity // inferred from electronic annotation///0016798 // hydrolase act…	chr5:129989021-130002848 (-) // 90.63 // qG1.3		2013-10-23	This probe set was annotated using the Matching Probes based pipeline to a Entrez Gene identifier using 17 transcripts. // false // Matching Probes // A	AK164041 // gb // 1 // Cross Hyb Matching Probes///AK184669 // gb // 5 // Cross Hyb Matching Probes///AK204308 // gb // 1 // Cross Hyb Matching Probes///J03047 // gb // 8 // Cross Hyb Matching Probes///M19279 // gb // 8 // Cross Hyb Matching Probes///GENSCAN00000003295 // ensembl // 2 // Cross Hyb Matching Probes///ENSMUST00000123618 // ensembl // 1 // Cross Hyb Matching Probes	AK041058(11),AK136519(11),AK146247(11),AK150048(11),AK151802(11),AK152206(11),AK159163(11),AK159526(11),AK159564(11),AK159804(11),AK162436(11),BC071226(11),ENSMUST00000026613(11),M28540(11),M28541(11),M63836(11),NM_010368(11)	Mm.3317	chr5 G1.3|5 68.32 cM	130002848	chr5	90.63	129989021	-	EC:3.2.1.31	ENSMUSG00000025534		glucuronidase, beta	Mouse Genome 430 2.0 Array	December 2011 (Mouse Genome Sequencing Consortium and NCBI 38)	GO:0005975|GO:0008152|GO:0005764|GO:0005764|GO:0005783|GO:0043231|GO:0003824|GO:0004553|GO:0004566|GO:0004566|GO:0016787|GO:0016798|GO:0030246|GO:0043169	IPR006102 // Glycoside hydrolase, family 2, immunoglobulin-like beta-sandwich // 1.3E-13///IPR006103 // Glycoside hydrolase, family 2, TIM barrel // 4.6E-112///IPR006104 // Glycoside hydrolase, family 2, N-terminal // 3.0E-41	95872				NP_034498	NM_010368	NM_010368		GenBank	Consensus sequence		Mus musculus	P12265///Q3TW82///Q8VEM0///Q8BPE3///Q99KJ6	gb:NM_010368.1 /DB_XREF=gi:6754097 /GEN=Gus-s /FEA=FLmRNA /CNT=240 /TID=Mm.3317.1 /TIER=FL+Stack /STK=190 /UG=Mm.3317 /LL=14927 /DEF=Mus musculus beta-glucuronidase structural (Gus-s), mRNA. /PROD=beta-glucuronidase structural /FL=gb:M63836.1 gb:M28541.1 gb:M28540.1 gb:NM_010368.1 gb:M19279.1 gb:J03047.1
1448162_at	41.9708	5.39132	41.9708	up	427.635	10.1888	2.69566	-2.69566	Vcam1	22329	0001666 // response to hypoxia // inferred from electronic annotation///0002526 // acute inflammatory response // inferred from electronic annotation///0002544 // chronic inflammatory response // inferred from electronic annotation///0007155 // cell adhesion // inferred from direct assay///0007155 // cell adhesion // not recorded///0007157 // heterophilic cell-cell adhesion // inferred from mutan…	0002102 // podosome // not recorded///0005615 // extracellular space // not recorded///0005886 // plasma membrane // inferred from electronic annotation///0005902 // microvillus // not recorded///0009897 // external side of plasma membrane // not recorded///0009986 // cell surface // not recorded///0016020 // membrane // inferred from electronic annotation///0016021 // integral to membrane // inf…	0005178 // integrin binding // not recorded///0005515 // protein binding // inferred from electronic annotation///0050839 // cell adhesion molecule binding // not recorded	chr3:116109950-116129686 (-) // 98.49 // qG1		2013-10-23	This probe set was annotated using the Matching Probes based pipeline to a Entrez Gene identifier using 9 transcripts. // false // Matching Probes // A		AK078081(11),AK143401(11),AK162954(11),AK169722(11),BC011159(11),BC029823(11),ENSMUST00000029574(11),M84487(11),NM_011693(11)	Mm.1021	chr3 G1|3 50.17 cM	116129686	chr3	98.49	116109950	-		ENSMUSG00000027962		vascular cell adhesion molecule 1	Mouse Genome 430 2.0 Array	December 2011 (Mouse Genome Sequencing Consortium and NCBI 38)	GO:0001666|GO:0002526|GO:0002544|GO:0007155|GO:0007155|GO:0007157|GO:0007157|GO:0007159|GO:0007159|GO:0007507|GO:0007568|GO:0007584|GO:0010212|GO:0016337|GO:0019048|GO:0022614|GO:0042102|GO:0050901|GO:0060326|GO:0060669|GO:0060710|GO:0061032|GO:0071333|GO:0002102|GO:0005615|GO:0005886|GO:0005902|GO:0009897|GO:0009986|GO:0016020|GO:0016021|GO:0030175|GO:0031225|GO:0042383|GO:0045177|GO:0071065|GO:…	IPR008424 // Immunoglobulin C2-set // 4.8E-28///IPR008424 // Immunoglobulin C2-set // 7.8E-27///IPR013098 // Immunoglobulin I-set // 3.4E-15///IPR013098 // Immunoglobulin I-set // 1.2E-10///IPR013098 // Immunoglobulin I-set // 3.1E-15///IPR013098 // Immunoglobulin I-set // 2.9E-11///IPR013098 // Immunoglobulin I-set // 3.5E-9///IPR013151 // Immunoglobulin // 2.5E-9///IPR013151 // Immunoglobulin /…	98926				NP_035823	NM_011693	BB250384		GenBank	Consensus sequence		Mus musculus	Q3UPN1///Q3TR98///Q91X98///Q8K0X1///P29533	gb:NM_011693.1 /DB_XREF=gi:6755960 /GEN=Vcam1 /FEA=FLmRNA /CNT=224 /TID=Mm.1021.1 /TIER=FL+Stack /STK=153 /UG=Mm.1021 /LL=22329 /DEF=Mus musculus vascular cell adhesion molecule 1 (Vcam1), mRNA. /PROD=vascular cell adhesion molecule 1 /FL=gb:NM_011693.1 gb:M84487.1
1449203_at	-12.3074	-3.62146	12.3074	down	41.1146	506.016	-1.81073	1.81073	Slco1a5	108096	0006810 // transport // inferred from electronic annotation///0006811 // ion transport // inferred from electronic annotation///0015711 // organic anion transport // not recorded///0015718 // monocarboxylic acid transport // not recorded///0015721 // bile acid and bile salt transport // not recorded///0031100 // organ regeneration // inferred from electronic annotation///0050892 // intestinal abs…	0005886 // plasma membrane // inferred from electronic annotation///0005887 // integral to plasma membrane // not recorded///0016020 // membrane // inferred from electronic annotation///0016021 // integral to membrane // inferred from electronic annotation///0031526 // brush border membrane // not recorded	0005215 // transporter activity // inferred from electronic annotation///0008028 // monocarboxylic acid transmembrane transporter activity // not recorded///0008514 // organic anion transmembrane transporter activity // not recorded///0015125 // bile acid transmembrane transporter activity // not recorded///0015349 // thyroid hormone transmembrane transporter activity // not recorded	chr6:142234161-142278836 (-) // 91.64 // qG2		2013-10-23	This probe set was annotated using the Matching Probes based pipeline to a Entrez Gene identifier using 6 transcripts. // false // Matching Probes // A	AF240694 // gb // 8 // Cross Hyb Matching Probes///BC013594 // gb // 4 // Cross Hyb Matching Probes	AK029706(10),ENSMUST00000081380(10),ENSMUST00000111825(10),ENSMUST00000153268(10),NM_001267707(10),NM_130861(10)	Mm.190930	chr6 G2|6	142278836	chr6	91.64	142234161	-		ENSMUSG00000063975		solute carrier organic anion transporter family, member 1a5	Mouse Genome 430 2.0 Array	December 2011 (Mouse Genome Sequencing Consortium and NCBI 38)	GO:0006810|GO:0006811|GO:0015711|GO:0015718|GO:0015721|GO:0031100|GO:0050892|GO:0055085|GO:0070327|GO:0005886|GO:0005887|GO:0016020|GO:0016021|GO:0031526|GO:0005215|GO:0008028|GO:0008514|GO:0015125|GO:0015349	IPR004156 // Organic anion transporter polypeptide OATP // 1.1E-17///IPR004156 // Organic anion transporter polypeptide OATP // 2.0E-200///IPR011701 // Major facilitator superfamily // 9.7E-32	1351865				NP_001254636///NP_570931	NM_001267707///NM_130861	NM_130861		GenBank	Consensus sequence		Mus musculus	Q91YY5///E0CX90///E0CX25///Q99K89	gb:NM_130861.1 /DB_XREF=gi:18699999 /GEN=Slc21a7 /FEA=FLmRNA /CNT=34 /TID=Mm.190930.1 /TIER=FL+Stack /STK=19 /UG=Mm.190930 /LL=108096 /DEF=Mus musculus solute carrier family 21 (organic anion transporter), member 7 (Slc21a7), mRNA. /PROD=solute carrier family 21 (organic aniontransporter), member 7 /FL=gb:BC013594.1 gb:NM_130861.1 gb:AF240694.1
1449334_at	-13.1619	-3.71829	13.1619	down	23.6351	311.082	-1.85915	1.85915	Timp3	21859	0007417 // central nervous system development // inferred from electronic annotation///0007568 // aging // inferred from electronic annotation///0009612 // response to mechanical stimulus // inferred from electronic annotation///0010466 // negative regulation of peptidase activity // inferred from electronic annotation///0014070 // response to organic cyclic compound // inferred from electronic a…	0005576 // extracellular region // inferred from electronic annotation///0005578 // proteinaceous extracellular matrix // inferred from electronic annotation///0005604 // basement membrane // inferred from direct assay///0005737 // cytoplasm // not recorded///0031012 // extracellular matrix // not recorded	0004857 // enzyme inhibitor activity // inferred from electronic annotation///0005515 // protein binding // inferred from electronic annotation///0008191 // metalloendopeptidase inhibitor activity // inferred from electronic annotation///0030414 // peptidase inhibitor activity // inferred from electronic annotation///0046872 // metal ion binding // inferred from electronic annotation	chr10:86300411-86349508 (+) // 96.36 // qC1		2013-10-23	This probe set was annotated using the Matching Probes based pipeline to a Entrez Gene identifier using 6 transcripts. // false // Matching Probes // A		AK083905(11),AK084069(11),AK147847(11),BC014713(10),ENSMUST00000020234(11),NM_011595(11)	Mm.4871	chr10 C1-D1|10 42.83 cM	86349508	chr10	96.36	86300411	+		ENSMUSG00000020044		tissue inhibitor of metalloproteinase 3	Mouse Genome 430 2.0 Array	December 2011 (Mouse Genome Sequencing Consortium and NCBI 38)	GO:0007417|GO:0007568|GO:0009612|GO:0010466|GO:0014070|GO:0042246|GO:0043200|GO:0043627|GO:0045861|GO:0051045|GO:0051593|GO:0071310|GO:0005576|GO:0005578|GO:0005604|GO:0005737|GO:0031012|GO:0004857|GO:0005515|GO:0008191|GO:0030414|GO:0046872	IPR001820 // Proteinase inhibitor I35, tissue inhibitor of metalloproteinase // 2.3E-69	98754		Matrix_Metalloproteinases // GenMAPP		NP_035725	NM_011595	BI111620		GenBank	Consensus sequence		Mus musculus	P39876///Q54AE5///Q6GXA7	gb:BC014713.1 /DB_XREF=gi:15928469 /FEA=FLmRNA /CNT=399 /TID=Mm.4871.1 /TIER=FL+Stack /STK=13 /UG=Mm.4871 /LL=21859 /UG_GENE=Timp3 /DEF=Mus musculus, Similar to tissue inhibitor of metalloproteinase 3, clone MGC:25359 IMAGE:4239015, mRNA, complete cds. /PROD=Similar to tissue inhibitor of metalloproteinase3 /FL=gb:BC014713.1 gb:L19622.1 gb:L27424.1 gb:NM_011595.1
1449335_at	-15.9371	-3.99431	15.9371	down	25.6542	408.853	-1.99716	1.99716	Timp3	21859	0007417 // central nervous system development // inferred from electronic annotation///0007568 // aging // inferred from electronic annotation///0009612 // response to mechanical stimulus // inferred from electronic annotation///0010466 // negative regulation of peptidase activity // inferred from electronic annotation///0014070 // response to organic cyclic compound // inferred from electronic a…	0005576 // extracellular region // inferred from electronic annotation///0005578 // proteinaceous extracellular matrix // inferred from electronic annotation///0005604 // basement membrane // inferred from direct assay///0005737 // cytoplasm // not recorded///0031012 // extracellular matrix // not recorded	0004857 // enzyme inhibitor activity // inferred from electronic annotation///0005515 // protein binding // inferred from electronic annotation///0008191 // metalloendopeptidase inhibitor activity // inferred from electronic annotation///0030414 // peptidase inhibitor activity // inferred from electronic annotation///0046872 // metal ion binding // inferred from electronic annotation	chr10:86300411-86349508 (+) // 96.36 // qC1		2013-10-23	This probe set was annotated using the Matching Probes based pipeline to a Entrez Gene identifier using 3 transcripts. // false // Matching Probes // A	AK082445 // gb // 11 // Negative Strand Matching Probes///ENSMUST00000123783 // ensembl // 11 // Negative Strand Matching Probes	AK083905(11),ENSMUST00000020234(11),NM_011595(11)	Mm.4871	chr10 C1-D1|10 42.83 cM	86349508	chr10	96.36	86300411	+		ENSMUSG00000020044		tissue inhibitor of metalloproteinase 3	Mouse Genome 430 2.0 Array	December 2011 (Mouse Genome Sequencing Consortium and NCBI 38)	GO:0007417|GO:0007568|GO:0009612|GO:0010466|GO:0014070|GO:0042246|GO:0043200|GO:0043627|GO:0045861|GO:0051045|GO:0051593|GO:0071310|GO:0005576|GO:0005578|GO:0005604|GO:0005737|GO:0031012|GO:0004857|GO:0005515|GO:0008191|GO:0030414|GO:0046872	IPR001820 // Proteinase inhibitor I35, tissue inhibitor of metalloproteinase // 2.3E-69	98754		Matrix_Metalloproteinases // GenMAPP		NP_035725	NM_011595	BI111620		GenBank	Consensus sequence		Mus musculus	P39876///Q54AE5///Q6GXA7	gb:BI111620 /DB_XREF=gi:14562521 /DB_XREF=602895984F1 /CLONE=IMAGE:5025861 /FEA=FLmRNA /CNT=399 /TID=Mm.4871.1 /TIER=Stack /STK=19 /UG=Mm.4871 /LL=21859 /UG_GENE=Timp3 /UG_TITLE=tissue inhibitor of metalloproteinase 3 /FL=gb:BC014713.1 gb:L19622.1 gb:L27424.1 gb:NM_011595.1
1449382_at	-26.9432	-4.75185	26.9432	down	14.2254	383.279	-2.37593	2.37593	Slc6a12	14411	0006810 // transport // inferred from electronic annotation///0006836 // neurotransmitter transport // inferred from electronic annotation///0009992 // cellular water homeostasis // not recorded///0010033 // response to organic substance // inferred from electronic annotation///0071474 // cellular hyperosmotic response // inferred from electronic annotation	0005887 // integral to plasma membrane // inferred from electronic annotation///0016020 // membrane // inferred from electronic annotation///0016021 // integral to membrane // not recorded	0005328 // neurotransmitter:sodium symporter activity // inferred from electronic annotation///0005332 // gamma-aminobutyric acid:sodium symporter activity // inferred from electronic annotation///0015293 // symporter activity // inferred from electronic annotation	chr6:121346617-121365773 (+) // 95.81 // qF1		2013-10-23	This probe set was annotated using the Matching Probes based pipeline to a Entrez Gene identifier using 3 transcripts. // false // Matching Probes // A	GENSCAN00000035042 // ensembl // 5 // Cross Hyb Matching Probes///ENSMUST00000166457 // ensembl // 5 // Cross Hyb Matching Probes///ENSMUST00000171008 // ensembl // 4 // Cross Hyb Matching Probes///ENSMUST00000165456 // ensembl // 5 // Cross Hyb Matching Probes///ENSMUST00000163771 // ensembl // 5 // Cross Hyb Matching Probes	BC019211(11),ENSMUST00000032200(11),NM_133661(11)	Mm.22562	chr6 F1|6	121365773	chr6	95.81	121346617	+		ENSMUSG00000030109		solute carrier family 6 (neurotransmitter transporter, betaine/GABA), member 12	Mouse Genome 430 2.0 Array	December 2011 (Mouse Genome Sequencing Consortium and NCBI 38)	GO:0006810|GO:0006836|GO:0009992|GO:0010033|GO:0071474|GO:0005887|GO:0016020|GO:0016021|GO:0005328|GO:0005332|GO:0015293	IPR000175 // Sodium:neurotransmitter symporter // 1.5E-244	95628				NP_598422	NM_133661	NM_133661		GenBank	Consensus sequence		Mus musculus	Q8VCS9///E9PW98///G5E8Z4///P31651	gb:NM_133661.1 /DB_XREF=gi:19526805 /GEN=Gabt2 /FEA=FLmRNA /CNT=30 /TID=Mm.22562.1 /TIER=FL+Stack /STK=12 /UG=Mm.22562 /LL=14411 /DEF=Mus musculus gamma-aminobutyric acid (GABA-A) transporter 2 (Gabt2), mRNA. /PROD=gamma-aminobutyric acid (GABA-A) transporter 2 /FL=gb:NM_133661.1 gb:BC019211.1
1449454_at	13.3854	3.74259	13.3854	up	107.28	8.01469	1.87129	-1.87129	Bst1	12182	0008152 // metabolic process // inferred from electronic annotation	0005886 // plasma membrane // inferred from electronic annotation///0016020 // membrane // inferred from electronic annotation///0031225 // anchored to membrane // inferred from electronic annotation	0000166 // nucleotide binding // inferred from electronic annotation///0003953 // NAD+ nucleosidase activity // inferred from electronic annotation///0016787 // hydrolase activity // inferred from electronic annotation	chr5:43818906-43843468 (+) // 85.15 // qB3		2013-10-23	This probe set was annotated using the Matching Probes based pipeline to a Entrez Gene identifier using 6 transcripts. // false // Matching Probes // A		AK041059(11),AK164028(11),ENSMUST00000101237(11),ENSMUST00000118126(11),L32812(10),NM_009763(11)	Mm.24612	chr5 B3|5 23.84 cM	43843468	chr5	85.15	43818906	+	EC:3.2.2.5	ENSMUSG00000029082		bone marrow stromal cell antigen 1	Mouse Genome 430 2.0 Array	December 2011 (Mouse Genome Sequencing Consortium and NCBI 38)	GO:0008152|GO:0005886|GO:0016020|GO:0031225|GO:0000166|GO:0003953|GO:0016787	IPR003193 // ADP-ribosyl cyclase (CD38/157) // 6.0E-102///IPR003193 // ADP-ribosyl cyclase (CD38/157) // 2.3E-70	105370				NP_033893	NM_009763	AI647987		GenBank	Consensus sequence		Mus musculus	Q64277///Q3TPZ1///D3Z579	gb:AI647987 /DB_XREF=gi:4726665 /DB_XREF=uk38g08.x1 /CLONE=IMAGE:1971326 /FEA=FLmRNA /CNT=38 /TID=Mm.24612.1 /TIER=Stack /STK=8 /UG=Mm.24612 /LL=12182 /UG_GENE=Bst1 /UG_TITLE=bone marrow stromal cell antigen 1 /FL=gb:L32812.1 gb:NM_009763.1 gb:D31788.1
1449560_at	10.0637	3.33109	10.0637	up	903.845	89.8122	1.66555	-1.66555	Krtap1-5	69664		0005882 // intermediate filament // inferred from electronic annotation///0045095 // keratin filament // inferred from electronic annotation		chr11:99579973-99581016 (-) // 99.71 // qD		2013-10-23	This probe set was annotated using the Matching Probes based pipeline to a Entrez Gene identifier using 3 transcripts. // false // Matching Probes // A	BC147095 // gb // 5 // Cross Hyb Matching Probes///BC147096 // gb // 5 // Cross Hyb Matching Probes	AK009782(11),ENSMUST00000054532(11),NM_027157(11)	Mm.38303	chr11 D|11	99581016	chr11	99.71	99579973	-		ENSMUSG00000047253		keratin associated protein 1-5	Mouse Genome 430 2.0 Array	December 2011 (Mouse Genome Sequencing Consortium and NCBI 38)	GO:0005882|GO:0045095	IPR002494 // High sulphur keratin-associated protein // 1.6E-15///IPR002494 // High sulphur keratin-associated protein // 8.4E-44	1916914				NP_081433	NM_027157	NM_027157		GenBank	Consensus sequence		Mus musculus	Q9D6Z9///A2A590	gb:NM_027157.1 /DB_XREF=gi:13386205 /GEN=2310043L02Rik /FEA=FLmRNA /CNT=15 /TID=Mm.38303.1 /TIER=FL /STK=7 /UG=Mm.38303 /LL=69664 /DEF=Mus musculus RIKEN cDNA 2310043L02 gene (2310043L02Rik), mRNA. /PROD=RIKEN cDNA 2310043L02 /FL=gb:NM_027157.1
1450734_at	11.8856	3.57115	11.8856	up	306.379	25.7772	1.78557	-1.78557	Sec16b	89867	0006810 // transport // inferred from electronic annotation///0007029 // endoplasmic reticulum organization // not recorded///0007031 // peroxisome organization // not recorded///0010628 // positive regulation of gene expression // not recorded///0015031 // protein transport // inferred from electronic annotation///0016192 // vesicle-mediated transport // inferred from electronic annotation///001…	0000139 // Golgi membrane // inferred from electronic annotation///0005783 // endoplasmic reticulum // inferred from electronic annotation///0005789 // endoplasmic reticulum membrane // inferred from electronic annotation///0005794 // Golgi apparatus // inferred from electronic annotation///0016020 // membrane // inferred from electronic annotation///0043231 // intracellular membrane-bounded orga…		chr1:157506809-157568422 (+) // 97.04 // qH1		2013-10-23	This probe set was annotated using the Matching Probes based pipeline to a Entrez Gene identifier using 8 transcripts. // false // Matching Probes // A	AB063356 // gb // 8 // Cross Hyb Matching Probes	AK132144(11),BC059194(10),ENSMUST00000027881(11),ENSMUST00000086130(11),ENSMUST00000111700(11),NM_001159986(11),NM_033354(11),NR_027641(11)	Mm.87114	chr1 H1|1	157568422	chr1	97.04	157506809	+		ENSMUSG00000026589		SEC16 homolog B (S. cerevisiae)	Mouse Genome 430 2.0 Array	December 2011 (Mouse Genome Sequencing Consortium and NCBI 38)	GO:0006810|GO:0007029|GO:0007031|GO:0010628|GO:0015031|GO:0016192|GO:0016559|GO:0048208|GO:0070863|GO:0070972|GO:0000139|GO:0005783|GO:0005789|GO:0005794|GO:0016020|GO:0043231		2148802				NP_001153458///NP_203505	NM_001159986///NM_033354///NR_027641	NM_033354		GenBank	Consensus sequence		Mus musculus	Q91XT4	gb:NM_033354.1 /DB_XREF=gi:15375333 /GEN=Rgpr-pending /FEA=FLmRNA /CNT=36 /TID=Mm.87114.1 /TIER=FL+Stack /STK=15 /UG=Mm.87114 /LL=89867 /DEF=Mus musculus regucalcin gene promotor region related protein (Rgpr-pending), mRNA. /PROD=regucalcin gene promotor region related protein /FL=gb:NM_033354.1 gb:AB063356.1
1450744_at	13.1608	3.71817	13.1608	up	172.408	13.1001	1.85909	-1.85909	Ell2	192657	0006351 // transcription, DNA-dependent // inferred from electronic annotation///0006355 // regulation of transcription, DNA-dependent // inferred from electronic annotation///0006368 // transcription elongation from RNA polymerase II promoter // not recorded///0032968 // positive regulation of transcription elongation from RNA polymerase II promoter // not recorded	0005634 // nucleus // not recorded///0008023 // transcription elongation factor complex // inferred from electronic annotation		chr13:75707520-75772356 (+) // 95.22 // qC1		2013-10-23	This probe set was annotated using the Matching Probes based pipeline to a Entrez Gene identifier using 7 transcripts. // false // Matching Probes // A		AK144197(10),AK145868(10),AK156164(11),AK161961(11),BC151188(11),ENSMUST00000001583(11),NM_138953(11)	Mm.21288	chr13 C1|13	75772356	chr13	95.22	75707520	+		ENSMUSG00000001542		elongation factor RNA polymerase II 2	Mouse Genome 430 2.0 Array	December 2011 (Mouse Genome Sequencing Consortium and NCBI 38)	GO:0006351|GO:0006355|GO:0006368|GO:0032968|GO:0005634|GO:0008023	IPR010844 // Occludin/RNA polymerase II elongation factor, ELL domain // 7.1E-39///IPR019464 // RNA polymerase II elongation factor ELL // 2.2E-112	2183438				NP_620403	NM_138953	NM_138953		GenBank	Consensus sequence		Mus musculus	Q3UKU1///Q3TSL9///B9EKX8///Q3US23///Q3TP42///Q3U3W6///Q8CCA3///Q922M9	gb:NM_138953.1 /DB_XREF=gi:20336737 /GEN=Ell2 /FEA=FLmRNA /CNT=75 /TID=Mm.21288.1 /TIER=FL+Stack /STK=13 /UG=Mm.21288 /LL=192657 /DEF=Mus musculus ELL-related RNA polymerase II, elongation factor (Ell2), mRNA. /PROD=ELL-related RNA polymerase II, elongationfactor /FL=gb:BC006925.1 gb:NM_138953.1
1450958_at	123.671	6.95036	123.671	up	2895.75	23.4149	3.47518	-3.47518	Tm4sf1	17112		0005887 // integral to plasma membrane // not recorded///0016020 // membrane // inferred from electronic annotation///0016021 // integral to membrane // inferred from electronic annotation		chr3:57287105-57295193 (-) // 95.45 // qD		2013-10-23	This probe set was annotated using the Matching Probes based pipeline to a Entrez Gene identifier using 10 transcripts. // false // Matching Probes // A	AK187197 // gb // 3 // Cross Hyb Matching Probes///GENSCAN00000023753 // ensembl // 8 // Cross Hyb Matching Probes	AK077326(11),AK133556(11),AK134603(11),AK164718(11),BC083073(11),ENSMUST00000029376(11),ENSMUST00000171384(11),L15429(11),L15443(11),NM_008536(11)	Mm.856	chr3 D|3	57295193	chr3	95.45	57287105	-		ENSMUSG00000027800		transmembrane 4 superfamily member 1	Mouse Genome 430 2.0 Array	December 2011 (Mouse Genome Sequencing Consortium and NCBI 38)	GO:0005887|GO:0016020|GO:0016021	IPR008661 // L6 membrane // 6.0E-98	104678				NP_032562	NM_008536	BQ177170		GenBank	Consensus sequence		Mus musculus	Q64302///Q3UZY2	gb:BQ177170 /DB_XREF=gi:20352662 /DB_XREF=UI-M-DJ2-bwa-h-02-0-UI.s1 /CLONE=UI-M-DJ2-bwa-h-02-0-UI /FEA=FLmRNA /CNT=157 /TID=Mm.856.1 /TIER=Stack /STK=10 /UG=Mm.856 /LL=17112 /UG_GENE=Tm4sf1 /UG_TITLE=transmembrane 4 superfamily member 1 /FL=gb:L15443.1 gb:L15429.1 gb:NM_008536.1
1451335_at	38.8204	5.27874	38.8204	up	1989.62	51.252	2.63937	-2.63937	Plac8	231507	0008284 // positive regulation of cell proliferation // inferred from direct assay///0009409 // response to cold // inferred from mutant phenotype///0040015 // negative regulation of multicellular organism growth // inferred from mutant phenotype///0042742 // defense response to bacterium // inferred from mutant phenotype///0043066 // negative regulation of apoptotic process // inferred from dire…	0005634 // nucleus // inferred by curator	0003682 // chromatin binding // inferred from direct assay///0005515 // protein binding // inferred from physical interaction	chr5:100553725-100562771 (-) // 85.94 // qE4		2013-10-23	This probe set was annotated using the Matching Probes based pipeline to a Entrez Gene identifier using 7 transcripts. // false // Matching Probes // A	GENSCAN00000021126 // ensembl // 4 // Cross Hyb Matching Probes	AF263458(11),AJ422151(10),BC010789(10),ENSMUST00000031264(10),ENSMUST00000097437(10),ENSMUST00000112910(10),NM_139198(10)	Mm.34609	chr5 E3|5 48.49 cM	100562771	chr5	85.94	100553725	-		ENSMUSG00000029322		placenta-specific 8	Mouse Genome 430 2.0 Array	December 2011 (Mouse Genome Sequencing Consortium and NCBI 38)	GO:0008284|GO:0009409|GO:0040015|GO:0042742|GO:0043066|GO:0043066|GO:0045944|GO:0045944|GO:0050873|GO:0005634|GO:0003682|GO:0005515	IPR006461 // Uncharacterised protein family Cys-rich // 7.1E-21	2445289				NP_631937	NM_139198	AF263458		GenBank	Consensus sequence		Mus musculus	Q9JI48	gb:AF263458.1 /DB_XREF=gi:8571447 /FEA=FLmRNA /CNT=96 /TID=Mm.34609.1 /TIER=FL+Stack /STK=35 /UG=Mm.34609 /LL=231507 /UG_GENE=onzin /DEF=Mus musculus onzin mRNA, complete cds. /PROD=onzin /FL=gb:AF263458.1 gb:BC010789.1
1451594_s_at	-12.8766	-3.68668	12.8766	down	14.8505	191.223	-1.84334	1.84334	Serpinb6c	97848	0010951 // negative regulation of endopeptidase activity // not recorded///0030162 // regulation of proteolysis // not recorded	0005615 // extracellular space // inferred from electronic annotation	0004867 // serine-type endopeptidase inhibitor activity // not recorded	chr13:33879815-33899441 (-) // 93.4 // qA3.3		2013-10-23	This probe set was annotated using the Matching Probes based pipeline to a Entrez Gene identifier using 5 transcripts. // false // Matching Probes // A	AK136270 // gb // 1 // Cross Hyb Matching Probes///NM_001076790 // refseq // 1 // Cross Hyb Matching Probes///GENSCAN00000005308 // ensembl // 1 // Cross Hyb Matching Probes///GENSCAN00000027915 // ensembl // 5 // Cross Hyb Matching Probes///ENSMUST00000059637 // ensembl // 1 // Cross Hyb Matching Probes	AF425084(11),BC062169(11),ENSMUST00000110273(11),ENSMUST00000172184(11),NM_148942(11)	Mm.206854	chr13 A3.3|13 13.99 cM	33899441	chr13	93.4	33879815	-		ENSMUSG00000052180		serine (or cysteine) peptidase inhibitor, clade B, member 6c	Mouse Genome 430 2.0 Array	December 2011 (Mouse Genome Sequencing Consortium and NCBI 38)	GO:0010951|GO:0030162|GO:0005615|GO:0004867	IPR023796 // Serpin domain // 3.1E-135///IPR023796 // Serpin domain // 3.1E-135	2145481				NP_683744	NM_148942	AF425084		GenBank	Consensus sequence		Mus musculus	Q8VHQ0///Q6P6K7	gb:AF425084.1 /DB_XREF=gi:18251229 /GEN=Serpinb6c /FEA=FLmRNA /CNT=12 /TID=Mm.206854.1 /TIER=FL /STK=6 /UG=Mm.206854 /DEF=Mus musculus SPI3C (Serpinb6c) mRNA, complete cds. /PROD=SPI3C /FL=gb:AF425084.1
1452417_x_at	-31.4782	-4.97628	31.4782	down	8.73577	274.987	-2.48814	2.48814	Igk-V28///Igkc///Igkj1///Igkv4-53///Igkv6-23///Igkv8-30	16071///16114///110759///384419///546213///637227	0030183 // B cell differentiation // inferred from mutant phenotype///0032496 // response to lipopolysaccharide // inferred from direct assay///0042493 // response to drug // inferred from direct assay		0003823 // antigen binding // inferred from electronic annotation	chr6:70726434-70726952 (+) // 48.25 // qC1		2013-10-23	This probe set was annotated using the Matching Probes based pipeline to a Entrez Gene identifier using 8 transcripts. // true // Matching Probes // A	n421307 // noncode // 2 // Cross Hyb Matching Probes///AF152371 // gb // 2 // Cross Hyb Matching Probes///AB048522 // gb // 2 // Cross Hyb Matching Probes///AB644394 // gb // 2 // Cross Hyb Matching Probes///AB644396 // gb // 2 // Cross Hyb Matching Probes///AF273438 // gb // 2 // Cross Hyb Matching Probes///AJ421676 // gb // 2 // Cross Hyb Matching Probes///AM745100 // gb // 3 // Cross Hyb Match…	n295815(9),BC100400(11),BC106160(11),BC106172(11),AK008450(9),AB097848(11),AB453397(11),AB538878(11),AF466768(11),AF466770(11),AJ555479(11),BC002035(11),BC002112(11),BC006643(11),BC013496(11),BC015292(11),BC019474(11),BC019760(11),BC021781(11),BC027418(11),BC028540(11),BC028925(11),BC031498(11),BC055906(11),BC055911(11),BC080787(11),BC084683(11),BC091750(11),BC091754(11),BC092251(11),BC094013(11)…	Mm.104747	chr6 C1|6///chr6 C|6 32.04 cM	70726952	chr6	48.25	70726434	+				immunoglobulin kappa chain variable 28 (V28)///immunoglobulin kappa constant///immunoglobulin kappa joining 1///immunoglobulin kappa variable 4-53///immunoglobulin kappa variable 6-23///immunoglobulin kappa chain variable 8-30	Mouse Genome 430 2.0 Array	December 2011 (Mouse Genome Sequencing Consortium and NCBI 38)	GO:0030183|GO:0032496|GO:0042493|GO:0003823		96495///96511///1316689///2686266///3642250///3711980						AV057155		GenBank	Consensus sequence		Mus musculus	I6L958///I6L971///I6L978///I6L991///I6L998///I6L9E1///I6L9E2///Q66JS7///Q5XFY8///Q58EU8///Q52L95///Q52L64///A0A5E3///Q7TS98///P01634///P01665///A2MY50///A2NC20///A2NHM3///A2P1G9///B5DC72///B5UB61///B5UB63///B5UB65///Q5F2I0///Q5F2I7///Q65ZC0///Q65ZN3///Q811U6///Q925S0///Q9JL80	gb:AV057155 /DB_XREF=gi:5156902 /DB_XREF=AV057155 /CLONE=1810044K02 /FEA=mRNA /CNT=13 /TID=Mm.104747.14 /TIER=ConsEnd /STK=2 /UG=Mm.104747 /LL=16114 /UG_GENE=Igk-V28 /UG_TITLE=immunoglobulin kappa chain variable 28 (V28)
1452661_at	-10.0028	-3.32234	10.0028	down	658.018	6582.05	-1.66117	1.66117	Tfrc	22042	0001666 // response to hypoxia // inferred from electronic annotation///0006508 // proteolysis // inferred from electronic annotation///0006879 // cellular iron ion homeostasis // inferred from mutant phenotype///0006897 // endocytosis // inferred from electronic annotation///0006953 // acute-phase response // inferred from electronic annotation///0007568 // aging // inferred from electronic anno…	0005576 // extracellular region // not recorded///0005739 // mitochondrion // not recorded///0005768 // endosome // inferred from direct assay///0005768 // endosome // not recorded///0005886 // plasma membrane // inferred from direct assay///0005886 // plasma membrane // not recorded///0005905 // coated pit // not recorded///0009897 // external side of plasma membrane // inferred from direct assa…	0004998 // transferrin receptor activity // not recorded///0004998 // transferrin receptor activity // traceable author statement///0005381 // iron ion transmembrane transporter activity // traceable author statement///0008233 // peptidase activity // inferred from electronic annotation///0030544 // Hsp70 protein binding // not recorded///0051087 // chaperone binding // not recorded	chr16:32628591-32632790 (+) // 96.22 // qB3		2013-10-23	This probe set was annotated using the Matching Probes based pipeline to a Entrez Gene identifier using 7 transcripts. // false // Matching Probes // A	AK201597 // gb // 4 // Cross Hyb Matching Probes	AK011596(11),AK171648(11),BC054522(11),BC067403(11),ENSMUST00000023486(11),ENSMUST00000128285(11),NM_011638(11)	Mm.28683	chr16 B3|16 23.06 cM	32632790	chr16	96.22	32628591	+		ENSMUSG00000022797		transferrin receptor	Mouse Genome 430 2.0 Array	December 2011 (Mouse Genome Sequencing Consortium and NCBI 38)	GO:0001666|GO:0006508|GO:0006879|GO:0006897|GO:0006953|GO:0007568|GO:0010033|GO:0010039|GO:0010042|GO:0030316|GO:0032526|GO:0034755|GO:0045780|GO:0046688|GO:0005576|GO:0005739|GO:0005768|GO:0005768|GO:0005886|GO:0005886|GO:0005905|GO:0009897|GO:0009986|GO:0016020|GO:0016021|GO:0016023|GO:0042470|GO:0048471|GO:0055037|GO:0055038|GO:0070062|GO:0070062|GO:0004998|GO:0004998|GO:0005381|GO:0008233|GO:…	IPR003137 // Protease-associated domain, PA // 1.2E-11///IPR007365 // Transferrin receptor-like, dimerisation domain // 2.7E-32///IPR007484 // Peptidase M28 // 1.4E-10	98822				NP_035768	NM_011638	AK011596		GenBank	Consensus sequence		Mus musculus	Q62351///Q542D9///Q8JZS3	gb:AK011596.1 /DB_XREF=gi:12847824 /FEA=mRNA /CNT=206 /TID=Mm.28683.1 /TIER=Stack /STK=122 /UG=Mm.28683 /LL=76361 /UG_GENE=2610028K12Rik /UG_TITLE=RIKEN cDNA 2610028K12 gene /DEF=Mus musculus 10 days embryo whole body cDNA, RIKEN full-length enriched library, clone:2610028K12:unclassifiable transcript, full insert sequence.
1452864_at	11.3058	3.49899	11.3058	up	155.544	13.7579	1.74949	-1.74949	Med12l	329650	0006351 // transcription, DNA-dependent // inferred from electronic annotation///0006355 // regulation of transcription, DNA-dependent // inferred from electronic annotation///0006357 // regulation of transcription from RNA polymerase II promoter // inferred from electronic annotation	0005634 // nucleus // inferred from electronic annotation///0016592 // mediator complex // inferred from electronic annotation	0001104 // RNA polymerase II transcription cofactor activity // inferred from electronic annotation///0008013 // beta-catenin binding // inferred from electronic annotation///0008134 // transcription factor binding // inferred from physical interaction	chr3:59316734-59318433 (+) // 99.59 // qD		2013-10-23	This probe set was annotated using the Matching Probes based pipeline to a Entrez Gene identifier using 4 transcripts. // false // Matching Probes // A	NM_001162884 // refseq // 11 // Negative Strand Matching Probes///ENSMUST00000039419 // ensembl // 11 // Negative Strand Matching Probes	AK018323(11),ENSMUST00000040325(11),ENSMUST00000164225(11),NM_177855(11)	Mm.29257	chr3 D|3	59318433	chr3	99.59	59316734	+		ENSMUSG00000056476		mediator of RNA polymerase II transcription, subunit 12 homolog (yeast)-like	Mouse Genome 430 2.0 Array	December 2011 (Mouse Genome Sequencing Consortium and NCBI 38)	GO:0006351|GO:0006355|GO:0006357|GO:0005634|GO:0016592|GO:0001104|GO:0008013|GO:0008134	IPR019035 // Mediator complex, subunit Med12 // 2.3E-18///IPR021989 // Mediator complex, subunit Med12, catenin-binding // 4.9E-15///IPR021989 // Mediator complex, subunit Med12, catenin-binding // 5.0E-15///IPR021990 // Mediator complex, subunit Med12, LCEWAV-domain // 1.1E-207///IPR021990 // Mediator complex, subunit Med12, LCEWAV-domain // 2.0E-208	2139916				NP_808523	NM_177855	BM022689		GenBank	Consensus sequence		Mus musculus	Q8BQM9///Q6ZPK9	gb:BM022689 /DB_XREF=gi:16537037 /DB_XREF=id64b12.x1 /CLONE=IMAGE:5667814 /FEA=mRNA /CNT=36 /TID=Mm.29257.1 /TIER=Stack /STK=27 /UG=Mm.29257 /LL=76231 /UG_GENE=6530405F15Rik /UG_TITLE=RIKEN cDNA 6530405F15 gene
1456028_x_at	-10.2165	-3.35283	10.2165	down	11.0826	113.225	-1.67641	1.67641	Marcks	17118		0005737 // cytoplasm // inferred from direct assay///0005737 // cytoplasm // not recorded///0005813 // centrosome // inferred from direct assay///0005856 // cytoskeleton // inferred from electronic annotation///0005938 // cell cortex // inferred from direct assay///0016020 // membrane // inferred from direct assay///0042585 // germinal vesicle // inferred from direct assay	0003779 // actin binding // inferred from electronic annotation///0005080 // protein kinase C binding // inferred from physical interaction///0005515 // protein binding // inferred from physical interaction///0005516 // calmodulin binding // inferred from electronic annotation	chr10:37135433-37135620 (-) // 52.51 // qB1		2013-10-23	This probe set was annotated using the Genome Target Overlap based pipeline to a Entrez Gene identifier using 8 transcripts. // false // Genome Target Overlap // B		AK082623,AK136452,AK151646,AK153217,BC046601,ENSMUST00000092584,M60474,NM_008538	Mm.30059	chr10 B1|10 19.49 cM	37135620	chr10	52.51	37135433	-		ENSMUSG00000069662		myristoylated alanine rich protein kinase C substrate	Mouse Genome 430 2.0 Array	December 2011 (Mouse Genome Sequencing Consortium and NCBI 38)	GO:0005737|GO:0005737|GO:0005813|GO:0005856|GO:0005938|GO:0016020|GO:0042585|GO:0003779|GO:0005080|GO:0005515|GO:0005516	IPR002101 // Myristoylated alanine-rich C-kinase substrate MARCKS // 6.0E-110	96907				NP_032564	NM_008538	BB454540		GenBank	Consensus sequence		Mus musculus	P26645///Q05BL6	gb:BB454540 /DB_XREF=gi:9350033 /DB_XREF=BB454540 /CLONE=D130032N18 /FEA=EST /CNT=21 /TID=Mm.30059.3 /TIER=Stack /STK=19 /UG=Mm.30059 /LL=17118 /UG_GENE=Macs /UG_TITLE=myristoylated alanine rich protein kinase C substrate
1456601_x_at	-22.6156	-4.49925	22.6156	down	18.3071	414.027	-2.24962	2.24962	Fxyd2	11936	0001558 // regulation of cell growth // not recorded///0006810 // transport // inferred from electronic annotation///0006811 // ion transport // inferred from electronic annotation///0006813 // potassium ion transport // not recorded///0006814 // sodium ion transport // not recorded///0042127 // regulation of cell proliferation // not recorded	0005890 // sodium:potassium-exchanging ATPase complex // not recorded///0016020 // membrane // inferred from electronic annotation///0016021 // integral to membrane // inferred from electronic annotation///0016323 // basolateral plasma membrane // not recorded///0043231 // intracellular membrane-bounded organelle // not recorded	0005216 // ion channel activity // inferred from electronic annotation///0005391 // sodium:potassium-exchanging ATPase activity // not recorded///0005515 // protein binding // inferred from electronic annotation	chr9:45409530-45410278 (+) // 66.07 // qA5.2		2013-10-23	This probe set was annotated using the Matching Probes based pipeline to a Entrez Gene identifier using 11 transcripts. // false // Matching Probes // A	n296280 // noncode // 7 // Cross Hyb Matching Probes///AK007105 // gb // 7 // Cross Hyb Matching Probes///GENSCAN00000012217 // ensembl // 4 // Cross Hyb Matching Probes	AK002215(11),AK002228(11),AY626243(11),AY626244(11),AY626245(11),BC024614(11),BC069892(11),ENSMUST00000041005(11),NM_007503(11),NM_052823(11),NR_028499(11)	Mm.22742	chr9|9 B	45410278	chr9	66.07	45409530	+		ENSMUSG00000059412		FXYD domain-containing ion transport regulator 2	Mouse Genome 430 2.0 Array	December 2011 (Mouse Genome Sequencing Consortium and NCBI 38)	GO:0001558|GO:0006810|GO:0006811|GO:0006813|GO:0006814|GO:0042127|GO:0005890|GO:0016020|GO:0016021|GO:0016323|GO:0043231|GO:0005216|GO:0005391|GO:0005515	IPR000272 // Ion-transport regulator, FXYD motif // 7.9E-29	1195260		Calcium_regulation_in_cardiac_cells // GenMAPP		NP_031529///NP_439888	NM_007503///NM_052823///NR_028499	AV002675		GenBank	Consensus sequence		Mus musculus	Q04646///Q6ITT2///Q6ITT1///Q6ITT0	gb:AV002675 /DB_XREF=gi:4779525 /DB_XREF=AV002675 /CLONE=0610019I02 /FEA=EST /CNT=45 /TID=Mm.22742.5 /TIER=Stack /STK=8 /UG=Mm.22742 /LL=11936 /UG_GENE=Fxyd2 /UG_TITLE=FXYD domain-containing ion transport regulator 2
1428640_at	12.1657	3.60475	12.1657	up	665.09	54.6691	1.80238	-1.80238	Hsf2bp	74377	0006950 // response to stress // inferred from electronic annotation	0005829 // cytosol // not recorded	0005488 // binding // inferred from electronic annotation///0005515 // protein binding // inferred from physical interaction	chr17:31944768-32034492 (-) // 93.38 // qB1		2013-10-23	This probe set was annotated using the Matching Probes based pipeline to a Entrez Gene identifier using 4 transcripts. // false // Matching Probes // A		AK016553(11),ENSMUST00000002145(11),ENSMUST00000133308(9),NM_028902(11)	Mm.75856	chr17 B1|17	32034492	chr17	93.38	31944768	-		ENSMUSG00000002076		heat shock transcription factor 2 binding protein	Mouse Genome 430 2.0 Array	December 2011 (Mouse Genome Sequencing Consortium and NCBI 38)	GO:0006950|GO:0005829|GO:0005488|GO:0005515		1921627				NP_083178	NM_028902	AK016553		GenBank	Consensus sequence		Mus musculus	Q9D4G2///F6UJ67	gb:AW550693 /DB_XREF=gi:7196121 /DB_XREF=L0067H08-3 /CLONE=L0067H08 /FEA=mRNA /CNT=37 /TID=Mm.75856.1 /TIER=Stack /STK=28 /UG=Mm.75856 /LL=74377 /UG_GENE=Hsf2bp /UG_TITLE=heat shock transcription factor 2 binding protein
1429759_at	-75.22	-6.23304	75.22	down	9.25889	696.454	-3.11652	3.11652	Rps6ka6	67071	0006468 // protein phosphorylation // inferred from electronic annotation///0006978 // DNA damage response, signal transduction by p53 class mediator resulting in transcription of p21 class mediator // not recorded///0007243 // intracellular protein kinase cascade // inferred from electronic annotation///0016310 // phosphorylation // inferred from electronic annotation///0045992 // negative regul…	0005634 // nucleus // inferred from electronic annotation///0005737 // cytoplasm // inferred from electronic annotation///0005829 // cytosol // inferred from electronic annotation///0005840 // ribosome // inferred from electronic annotation	0000166 // nucleotide binding // inferred from electronic annotation///0000287 // magnesium ion binding // inferred from electronic annotation///0004672 // protein kinase activity // inferred from electronic annotation///0004674 // protein serine/threonine kinase activity // inferred from electronic annotation///0004713 // protein tyrosine kinase activity // inferred from electronic annotation///…	chrX:111387878-111417143 (-) // 99.85 // qE1		2013-10-23	This probe set was annotated using the Matching Probes based pipeline to a Entrez Gene identifier using 9 transcripts. // false // Matching Probes // A		AK012150(11),AK014822(11),AK049349(10),BC054113(11),ENSMUST00000065976(11),ENSMUST00000082034(11),ENSMUST00000096348(11),ENSMUST00000113428(11),NM_025949(11)	Mm.37617	chrX E1|X	111417143	chrX	99.85	111387878	-	EC:2.7.11.1	ENSMUSG00000025665		ribosomal protein S6 kinase polypeptide 6	Mouse Genome 430 2.0 Array	December 2011 (Mouse Genome Sequencing Consortium and NCBI 38)	GO:0006468|GO:0006978|GO:0007243|GO:0016310|GO:0045992|GO:0070373|GO:2000381|GO:0005634|GO:0005737|GO:0005829|GO:0005840|GO:0000166|GO:0000287|GO:0004672|GO:0004674|GO:0004713|GO:0005524|GO:0016301|GO:0016740|GO:0016772|GO:0046872	IPR000719 // Protein kinase, catalytic domain // 3.8E-72///IPR000719 // Protein kinase, catalytic domain // 6.6E-63///IPR000719 // Protein kinase, catalytic domain // 4.3E-72///IPR000719 // Protein kinase, catalytic domain // 2.7E-73///IPR000719 // Protein kinase, catalytic domain // 4.2E-72///IPR000719 // Protein kinase, catalytic domain // 8.0E-68///IPR000719 // Protein kinase, catalytic domain…	1914321				NP_080225	NM_025949	BB449218		GenBank	Consensus sequence		Mus musculus	Q7TPS0///E9QK39///E9PUP0///A2CEE7///A2CEE6///A2CEE8///B1B0X1///B1B0X3///B1B0X4	gb:BB402211 /DB_XREF=gi:16415121 /DB_XREF=BB402211 /CLONE=C330026J02 /FEA=mRNA /CNT=113 /TID=Mm.37617.1 /TIER=Stack /STK=8 /UG=Mm.37617 /LL=67071 /UG_GENE=2610524K04Rik /UG_TITLE=RIKEN cDNA 2610524K04 gene
1434458_at	37.8946	5.24392	37.8946	up	443.445	11.7021	2.62196	-2.62196	Fst	14313	0000122 // negative regulation of transcription from RNA polymerase II promoter // not recorded///0002244 // hematopoietic progenitor cell differentiation // not recorded///0007276 // gamete generation // inferred from genetic interaction///0007389 // pattern specification process // inferred from mutant phenotype///0008585 // female gonad development // inferred from mutant phenotype///0030509 /…	0005576 // extracellular region // inferred from electronic annotation///0005634 // nucleus // inferred from direct assay///0005737 // cytoplasm // inferred from direct assay	0005515 // protein binding // inferred from electronic annotation///0043395 // heparan sulfate proteoglycan binding // not recorded///0048185 // activin binding // not recorded	chr13:114452262-114453340 (-) // 91.35 // qD2.2		2013-10-23	This probe set was annotated using the Matching Probes based pipeline to a Entrez Gene identifier using 3 transcripts. // false // Matching Probes // A	GENSCAN00000000761 // ensembl // 3 // Cross Hyb Matching Probes	AK083556(11),ENSMUST00000022287(11),NM_008046(11)	Mm.23835	chr13 D2.2|13	114453340	chr13	91.35	114452262	-		ENSMUSG00000021765		follistatin	Mouse Genome 430 2.0 Array	December 2011 (Mouse Genome Sequencing Consortium and NCBI 38)	GO:0000122|GO:0002244|GO:0007276|GO:0007389|GO:0008585|GO:0030509|GO:0031069|GO:0032926|GO:0042475|GO:0043616|GO:0045596|GO:0045596|GO:0051798|GO:0005576|GO:0005634|GO:0005737|GO:0005515|GO:0043395|GO:0048185	IPR002350 // Kazal domain // 1.3E-13///IPR002350 // Kazal domain // 6.8E-12///IPR002350 // Kazal domain // 4.5E-13///IPR015369 // Follistatin/Osteonectin EGF domain // 2.2E-12			TGF_Beta_Signaling_Pathway // GenMAPP		NP_032072	NM_008046	BB444134		GenBank	Consensus sequence		Mus musculus	P47931	gb:BB444134 /DB_XREF=gi:16424930 /DB_XREF=BB444134 /CLONE=D030044K10 /FEA=EST /CNT=41 /TID=Mm.23835.1 /TIER=Stack /STK=32 /UG=Mm.23835 /UG_TITLE=ESTs
1435741_at	-35.0511	-5.13139	35.0511	down	13.8552	485.64	-2.56569	2.56569	Pde8b	218461	0000160 // phosphorelay signal transduction system // inferred from electronic annotation///0006355 // regulation of transcription, DNA-dependent // inferred from electronic annotation///0007165 // signal transduction // inferred from electronic annotation///0008152 // metabolic process // inferred from electronic annotation///0035556 // intracellular signal transduction // inferred from electron…	0005622 // intracellular // inferred from electronic annotation	0000156 // phosphorelay response regulator activity // inferred from electronic annotation///0003824 // catalytic activity // inferred from electronic annotation///0004114 // 3',5'-cyclic-nucleotide phosphodiesterase activity // inferred from electronic annotation///0004871 // signal transducer activity // inferred from electronic annotation///0008081 // phosphoric diester hydrolase activity // i…	chr13:95024453-95026034 (-) // 95.11 // qD1		2013-10-23	This probe set was annotated using the Matching Probes based pipeline to a Entrez Gene identifier using 9 transcripts. // false // Matching Probes // A	n268884 // noncode // 11 // Negative Strand Matching Probes///AK053128 // gb // 11 // Negative Strand Matching Probes	AK045991(11),AK083166(11),AK170192(11),BC032286(11),ENSMUST00000162292(11),ENSMUST00000162412(11),ENSMUST00000162670(11),NM_001170669(11),NM_172263(11)	Mm.100167	chr13 D1|13	95026034	chr13	95.11	95024453	-	EC:3.1.4.17	ENSMUSG00000021684		phosphodiesterase 8B	Mouse Genome 430 2.0 Array	December 2011 (Mouse Genome Sequencing Consortium and NCBI 38)	GO:0000160|GO:0006355|GO:0007165|GO:0008152|GO:0035556|GO:0046676|GO:0005622|GO:0000156|GO:0003824|GO:0004114|GO:0004871|GO:0008081|GO:0016787|GO:0046872	IPR001789 // Signal transduction response regulator, receiver domain // 9.0E-18///IPR001789 // Signal transduction response regulator, receiver domain // 7.6E-18///IPR002073 // 3'5'-cyclic nucleotide phosphodiesterase, catalytic domain // 1.4E-65///IPR002073 // 3'5'-cyclic nucleotide phosphodiesterase, catalytic domain // 7.9E-39///IPR002073 // 3'5'-cyclic nucleotide phosphodiesterase, catalytic …	2443999				NP_001164140///NP_758467	NM_001170669///NM_172263	BB312125		GenBank	Consensus sequence		Mus musculus	Q8BI47///Q8CFW8///F7CT85///E9PYP0///E9PXX4///Q3UUK9///E0CY70///A6YR19///Q3U4Q2///Q8BIA0	gb:BB312125 /DB_XREF=gi:16402766 /DB_XREF=BB312125 /CLONE=B230331L10 /FEA=EST /CNT=42 /TID=Mm.100167.1 /TIER=Stack /STK=13 /UG=Mm.100167 /UG_TITLE=ESTs, Moderately similar to CN8A MOUSE HIGH-AFFINITY CAMP-SPECIFIC AND IBMX-INSENSITIVE 3,5-CYCLIC PHOSPHODIESTERASE 8A (M.musculus)
1436142_at	10.1758	3.34707	10.1758	up	79.2342	7.78651	1.67354	-1.67354	Akap5	238276	0001934 // positive regulation of protein phosphorylation // not recorded///0006605 // protein targeting // inferred from electronic annotation///0007165 // signal transduction // inferred from electronic annotation///0007194 // negative regulation of adenylate cyclase activity // not recorded///0010524 // positive regulation of calcium ion transport into cytosol // not recorded///0010739 // posi…	0005622 // intracellular // inferred from electronic annotation///0005737 // cytoplasm // not recorded///0005886 // plasma membrane // not recorded///0014069 // postsynaptic density // not recorded///0016020 // membrane // inferred from electronic annotation///0016323 // basolateral plasma membrane // not recorded///0031527 // filopodium membrane // not recorded///0032279 // asymmetric synapse //…	0001664 // G-protein coupled receptor binding // not recorded///0003779 // actin binding // not recorded///0005515 // protein binding // inferred from electronic annotation///0005515 // protein binding // inferred from physical interaction///0005516 // calmodulin binding // inferred from electronic annotation///0008179 // adenylate cyclase binding // not recorded///0019900 // kinase binding // no…	chr12:76333629-76334153 (+) // 91.03 // qC3		2013-10-23	This probe set was annotated using the Matching Probes based pipeline to a Entrez Gene identifier using 4 transcripts. // false // Matching Probes // A		AK014386(9),ENSMUST00000095610(9),ENSMUST00000154078(9),NM_001101471(9)	Mm.54484	chr12 C3|12	76334153	chr12	91.03	76333629	+		ENSMUSG00000021057		A kinase (PRKA) anchor protein 5	Mouse Genome 430 2.0 Array	December 2011 (Mouse Genome Sequencing Consortium and NCBI 38)	GO:0001934|GO:0006605|GO:0007165|GO:0007194|GO:0010524|GO:0010739|GO:0014850|GO:0021510|GO:0021766|GO:0030819|GO:0043267|GO:0043271|GO:0043624|GO:0045762|GO:0050775|GO:0051533|GO:0051602|GO:0060135|GO:0070887|GO:0005622|GO:0005737|GO:0005886|GO:0014069|GO:0016020|GO:0016323|GO:0031527|GO:0032279|GO:0032590|GO:0032591|GO:0043025|GO:0043197|GO:0043198|GO:0043234|GO:0048471|GO:0001664|GO:0003779|GO:…	IPR001573 // Protein kinase A anchoring, WSK motif // 6.7E-14///IPR001573 // Protein kinase A anchoring, WSK motif // 6.6E-14	2685104				NP_001094941	NM_001101471	BM218877		GenBank	Consensus sequence		Mus musculus	D3YVF0///H3BIV5	gb:BM218877 /DB_XREF=gi:17778530 /DB_XREF=C0917B02-3 /CLONE=C0917B02 /FEA=EST /CNT=11 /TID=Mm.54484.2 /TIER=Stack /STK=11 /UG=Mm.54484 /LL=70774 /UG_GENE=3526401B18Rik /UG_TITLE=RIKEN cDNA 3526401B18 gene
1436796_at	-12.6241	-3.65811	12.6241	down	189.042	2386.49	-1.82905	1.82905	Snhg4	100503380				chr18:35553414-35558316 (+) // 60.88 // qB2		2013-10-23	This probe set was annotated using the Matching Probes based pipeline to a Entrez Gene identifier using 4 transcripts. // false // Matching Probes // A	n267182 // noncode // 1 // Cross Hyb Matching Probes///AK088959 // gb // 1 // Cross Hyb Matching Probes	AK004333(9),AK041908(11),AK080350(11),NR_038073(11)	Mm.36541	chr18|18 19.14 cM	35558316	chr18	60.88	35553414	+		ENSMUSG00000097769		small nucleolar RNA host gene 4 (non-protein coding)	Mouse Genome 430 2.0 Array	December 2011 (Mouse Genome Sequencing Consortium and NCBI 38)			4937091					NR_038073	BB237072		GenBank	Consensus sequence		Mus musculus		gb:BB237072 /DB_XREF=gi:16354866 /DB_XREF=BB237072 /CLONE=A630063B10 /FEA=EST /CNT=77 /TID=Mm.36541.2 /TIER=Stack /STK=51 /UG=Mm.36541 /LL=69967 /UG_GENE=2810017I02Rik /UG_TITLE=RIKEN cDNA 2810017I02 gene
1437989_at	-28.1121	-4.81312	28.1121	down	11.6225	326.733	-2.40656	2.40656	Pde8b	218461	0000160 // phosphorelay signal transduction system // inferred from electronic annotation///0006355 // regulation of transcription, DNA-dependent // inferred from electronic annotation///0007165 // signal transduction // inferred from electronic annotation///0008152 // metabolic process // inferred from electronic annotation///0035556 // intracellular signal transduction // inferred from electron…	0005622 // intracellular // inferred from electronic annotation	0000156 // phosphorelay response regulator activity // inferred from electronic annotation///0003824 // catalytic activity // inferred from electronic annotation///0004114 // 3',5'-cyclic-nucleotide phosphodiesterase activity // inferred from electronic annotation///0004871 // signal transducer activity // inferred from electronic annotation///0008081 // phosphoric diester hydrolase activity // i…	chr13:95025923-95026244 (-) // 99.38 // qD1		2013-10-23	This probe set was annotated using the Matching Probes based pipeline to a Entrez Gene identifier using 13 transcripts. // false // Matching Probes // A	EF644173 // gb // 3 // Cross Hyb Matching Probes///GENSCAN00000010271 // ensembl // 1 // Cross Hyb Matching Probes///GENSCAN00000019603 // ensembl // 3 // Cross Hyb Matching Probes///ENSMUST00000162153 // ensembl // 3 // Cross Hyb Matching Probes///ENSMUST00000067082 // ensembl // 3 // Cross Hyb Matching Probes///ENSMUST00000022192 // ensembl // 3 // Cross Hyb Matching Probes///ENSMUST00000172104…	AK043680(10),AK045991(10),AK083166(10),AK138301(10),AK154105(10),AK170192(10),BC032286(10),ENSMUST00000162292(10),ENSMUST00000162412(10),ENSMUST00000162670(10),ENSMUST00000162882(10),NM_001170669(10),NM_172263(10)	Mm.100167	chr13 D1|13	95026244	chr13	99.38	95025923	-	EC:3.1.4.17	ENSMUSG00000021684		phosphodiesterase 8B	Mouse Genome 430 2.0 Array	December 2011 (Mouse Genome Sequencing Consortium and NCBI 38)	GO:0000160|GO:0006355|GO:0007165|GO:0008152|GO:0035556|GO:0046676|GO:0005622|GO:0000156|GO:0003824|GO:0004114|GO:0004871|GO:0008081|GO:0016787|GO:0046872	IPR001789 // Signal transduction response regulator, receiver domain // 9.0E-18///IPR001789 // Signal transduction response regulator, receiver domain // 7.6E-18///IPR002073 // 3'5'-cyclic nucleotide phosphodiesterase, catalytic domain // 1.4E-65///IPR002073 // 3'5'-cyclic nucleotide phosphodiesterase, catalytic domain // 7.9E-39///IPR002073 // 3'5'-cyclic nucleotide phosphodiesterase, catalytic …	2443999				NP_001164140///NP_758467	NM_001170669///NM_172263	BB357157		GenBank	Consensus sequence		Mus musculus	Q8BI47///Q3UUK9///Q3U4Q2///Q8CFW8///F7CT85///E9PYP0///E9PXX4///E0CY70///A6YR19///Q8BIA0	gb:BB357157 /DB_XREF=gi:9068985 /DB_XREF=BB357157 /CLONE=C030019C19 /FEA=EST /CNT=13 /TID=Mm.100167.2 /TIER=Stack /STK=13 /UG=Mm.100167 /UG_TITLE=ESTs, Moderately similar to CN8A MOUSE HIGH-AFFINITY CAMP-SPECIFIC AND IBMX-INSENSITIVE 3,5-CYCLIC PHOSPHODIESTERASE 8A (M.musculus)
1438707_at	-13.2032	-3.72281	13.2032	down	15.3133	202.184	-1.86141	1.86141	Atp13a4	224079	0006200 // ATP catabolic process // inferred from electronic annotation///0006812 // cation transport // inferred from electronic annotation///0008152 // metabolic process // inferred from electronic annotation	0016020 // membrane // inferred from electronic annotation///0016021 // integral to membrane // inferred from electronic annotation	0000166 // nucleotide binding // inferred from electronic annotation///0003824 // catalytic activity // inferred from electronic annotation///0005524 // ATP binding // inferred from electronic annotation///0015662 // ATPase activity, coupled to transmembrane movement of ions, phosphorylative mechanism // inferred from electronic annotation///0016787 // hydrolase activity // inferred from electron…	chr16:29396025-29449965 (-) // 97.42 // qB2		2013-10-23	This probe set was annotated using the Matching Probes based pipeline to a Entrez Gene identifier using 6 transcripts. // false // Matching Probes // A	GENSCAN00000042682 // ensembl // 6 // Cross Hyb Matching Probes	AK029303(11),BC038696(11),BC048410(11),ENSMUST00000057018(11),NM_001164612(11),NM_172613(11)	Mm.54954	chr16 B2|16	29449965	chr16	97.42	29396025	-	EC:3.6.3.-	ENSMUSG00000038094		ATPase type 13A4	Mouse Genome 430 2.0 Array	December 2011 (Mouse Genome Sequencing Consortium and NCBI 38)	GO:0006200|GO:0006812|GO:0008152|GO:0016020|GO:0016021|GO:0000166|GO:0003824|GO:0005524|GO:0015662|GO:0016787|GO:0016820|GO:0016887|GO:0019829|GO:0046872	IPR004014 // Cation-transporting P-type ATPase, N-terminal // 5.3E-11///IPR008250 // P-type ATPase, A domain // 1.3E-36	1924456				NP_001158084///NP_001158085///NP_766201	NM_001164612///NM_001164613///NM_172613	BE687891		GenBank	Consensus sequence		Mus musculus	Q5XF90///E9QPP7	gb:BE687891 /DB_XREF=gi:10075515 /DB_XREF=uw52g03.x1 /CLONE=IMAGE:3465652 /FEA=EST /CNT=26 /TID=Mm.54954.1 /TIER=Stack /STK=9 /UG=Mm.54954 /UG_TITLE=ESTs, Weakly similar to ATC2_MOUSE SARCOPLASMICENDOPLASMIC RETICULUM CALCIUM ATPASE 2 (CALCIUM PUMP 2) (SERCA2) (SR CA(2+)-ATPASE 2) (CALCIUM-TRANSPORTING ATPASE SARCOPLASMIC RETICULUM TYPE, SLOW TWITCH SKELETAL MUSCLE ISOFORM) (ENDOPLASMIC RETICULUM…
1439753_x_at	11.9846	3.58311	11.9846	up	70.9651	5.92136	1.79155	-1.79155	Six4	20474	0006355 // regulation of transcription, DNA-dependent // inferred from electronic annotation///0007275 // multicellular organismal development // inferred from electronic annotation///0007519 // skeletal muscle tissue development // inferred from genetic interaction///0008582 // regulation of synaptic growth at neuromuscular junction // inferred from genetic interaction///0010468 // regulation of…	0005634 // nucleus // inferred by curator///0005634 // nucleus // inferred from direct assay///0005737 // cytoplasm // inferred from electronic annotation	0003677 // DNA binding // inferred from direct assay///0003700 // sequence-specific DNA binding transcription factor activity // inferred from direct assay///0005515 // protein binding // inferred from physical interaction///0043565 // sequence-specific DNA binding // inferred from direct assay	chr12:73099608-73100029 (-) // 98.13 // qC3		2013-10-23	This probe set was annotated using the Matching Probes based pipeline to a Entrez Gene identifier using 1 transcripts. // false // Matching Probes // A		ENSMUST00000043208(11)	Mm.99555	chr12 C3|12	73100029	chr12	98.13	73099608	-		ENSMUSG00000034460		sine oculis-related homeobox 4	Mouse Genome 430 2.0 Array	December 2011 (Mouse Genome Sequencing Consortium and NCBI 38)	GO:0006355|GO:0007275|GO:0007519|GO:0008582|GO:0010468|GO:0032880|GO:0042472|GO:0043524|GO:0045893|GO:0045893|GO:0045944|GO:0048538|GO:0048699|GO:0048701|GO:0048704|GO:0048856|GO:0051451|GO:0072075|GO:0072095|GO:0072107|GO:0090190|GO:0005634|GO:0005634|GO:0005737|GO:0003677|GO:0003700|GO:0005515|GO:0043565	IPR001356 // Homeodomain // 5.5E-18					NP_035512	NM_011382	AI893638		GenBank	Consensus sequence		Mus musculus	Q61321	gb:AI893638 /DB_XREF=gi:5599540 /DB_XREF=mn04a03.x1 /CLONE=IMAGE:536908 /FEA=EST /CNT=7 /TID=Mm.99555.1 /TIER=ConsEnd /STK=7 /UG=Mm.99555 /UG_TITLE=ESTs
1439925_at	14.7989	3.88742	14.7989	up	324.92	21.9556	1.94371	-1.94371	Tm4sf1	17112		0005887 // integral to plasma membrane // not recorded///0016020 // membrane // inferred from electronic annotation///0016021 // integral to membrane // inferred from electronic annotation		chr3:57285612-57286331 (-) // 24.38 // qD		2013-10-23	This probe set was annotated using the Matching Probes based pipeline to a Entrez Gene identifier using 2 transcripts. // false // Matching Probes // A		AK133556(11),ENSMUST00000171384(11)	Mm.44024	chr3 D|3	57286331	chr3	24.38	57285612	-		ENSMUSG00000027800		transmembrane 4 superfamily member 1	Mouse Genome 430 2.0 Array	December 2011 (Mouse Genome Sequencing Consortium and NCBI 38)	GO:0005887|GO:0016020|GO:0016021	IPR008661 // L6 membrane // 6.0E-98	104678				NP_032562	NM_008536	BQ031166		GenBank	Consensus sequence		Mus musculus	Q3UZY2///Q64302	gb:BQ031166 /DB_XREF=gi:19766445 /DB_XREF=UI-1-CF0-amb-e-08-0-UI.s1 /CLONE=UI-1-CF0-amb-e-08-0-UI /FEA=EST /CNT=7 /TID=Mm.44024.1 /TIER=ConsEnd /STK=6 /UG=Mm.44024 /UG_TITLE=ESTs
1440218_at	66.7497	6.06069	66.7497	up	702.798	10.5289	3.03034	-3.03034	Cdhr2	268663	0007155 // cell adhesion // not recorded///0007156 // homophilic cell adhesion // inferred from electronic annotation///0030308 // negative regulation of cell growth // not recorded	0005886 // plasma membrane // inferred from electronic annotation///0016020 // membrane // inferred from electronic annotation///0016021 // integral to membrane // not recorded	0005509 // calcium ion binding // inferred from electronic annotation///0005515 // protein binding // inferred from electronic annotation	chr13:54731089-54736661 (+) // 94.39 // qB1		2013-10-23	This probe set was annotated using the Matching Probes based pipeline to a Entrez Gene identifier using 5 transcripts. // false // Matching Probes // A		AK144400(11),BC141301(11),BC145624(10),ENSMUST00000037145(11),NM_001033364(11)	Mm.197409	chr13 B1|13	54736661	chr13	94.39	54731089	+		ENSMUSG00000034918		cadherin-related family member 2	Mouse Genome 430 2.0 Array	December 2011 (Mouse Genome Sequencing Consortium and NCBI 38)	GO:0007155|GO:0007156|GO:0030308|GO:0005886|GO:0016020|GO:0016021|GO:0005509|GO:0005515	IPR002126 // Cadherin // 1.5E-13///IPR002126 // Cadherin // 4.7E-11///IPR002126 // Cadherin // 6.5E-17///IPR002126 // Cadherin // 7.5E-17///IPR002126 // Cadherin // 4.9E-18///IPR002126 // Cadherin // 6.9E-16///IPR002126 // Cadherin // 4.0E-12	2687323				NP_001028536	NM_001033364	BB745015		GenBank	Consensus sequence		Mus musculus	Q3UN77///B9EJ32///B7ZP46///E9Q7P9///Q8K066	gb:BB745015 /DB_XREF=gi:16147954 /DB_XREF=BB745015 /CLONE=F530006B09 /FEA=EST /CNT=12 /TID=Mm.197409.1 /TIER=ConsEnd /STK=5 /UG=Mm.197409 /UG_TITLE=ESTs, Weakly similar to protocadherin LKC precursor (Homo sapiens) (H.sapiens)
1443483_at	33.3482	5.05954	33.3482	up	357.998	10.7352	2.52977	-2.52977	Xlr5a///Xlr5b///Xlr5c	27084///574438///627081				chrX:73158305-73158886 (+) // 99.14 // qA7.3///chrX:74659728-74660307 (+) // 98.11 // qA7.3///chrX:73282881-73283462 (-) // 99.83 // qA7.3///chrX:73107620-73108199 (-) // 99.48 // qA7.3///chrX:74822514-74823093 (-) // 98.11 // qA7.3		2013-10-23	This probe set was annotated using the Matching Probes based pipeline to a Entrez Gene identifier using 7 transcripts. // true // Matching Probes // A		BC051681(11),NM_001045539(11),ENSMUST00000078574(11),ENSMUST00000114521(11),ENSMUST00000179600(11),ENSMUST00000114518(10),ENSMUST00000114503(11)	Mm.139096	chrX A7.2|X///chrX A7.3|X///chrX A7.3|X 37.29 cM	73158886	chrX	99.14	73158305	+		ENSMUSG00000058328///ENSMUSG00000067764///ENSMUSG00000072479		X-linked lymphocyte-regulated 5A///X-linked lymphocyte-regulated 5B///X-linked lymphocyte-regulated 5C	Mouse Genome 430 2.0 Array	December 2011 (Mouse Genome Sequencing Consortium and NCBI 38)		IPR006888 // Cor1/Xlr/Xmr family // 3.3E-25///IPR006888 // Cor1/Xlr/Xmr family // 3.0E-16///IPR006888 // Cor1/Xlr/Xmr family // 5.0E-26	3574108				NP_001039004///NP_001104763///NP_113681	NM_001045539///NM_001111293///NM_031493	BM207672		GenBank	Consensus sequence		Mus musculus	Q80UK6///A2AIE6///A2BI50///A2BI45///A2BI46///A2BI49///Q9JJR2	gb:BM207672 /DB_XREF=gi:17763601 /DB_XREF=C0616C02-3 /CLONE=C0616C02 /FEA=EST /CNT=3 /TID=Mm.139096.1 /TIER=ConsEnd /STK=3 /UG=Mm.139096 /UG_TITLE=ESTs
1443847_x_at	-13.8498	-3.79179	13.8498	down	16.1267	223.351	-1.89589	1.89589						chrX:69871839-69872052 (+) // 100.0 // qA7.2		2013-10-23	This probe set was annotated using the Accession mapped clusters based pipeline to a UniGene identifier using 3 transcripts. // false // Accession mapped clusters // E		BB384594,BB342212,BB075144	Mm.125743		69872052	chrX	100	69871839	+					Mouse Genome 430 2.0 Array	December 2011 (Mouse Genome Sequencing Consortium and NCBI 38)			1202294						BB342212		GenBank	Consensus sequence		Mus musculus		gb:BB342212 /DB_XREF=gi:9051921 /DB_XREF=BB342212 /CLONE=B930036A10 /FEA=EST /CNT=3 /TID=Mm.125743.1 /TIER=ConsEnd /STK=3 /UG=Mm.125743 /UG_TITLE=ESTs
1446715_at	12.9383	3.69358	12.9383	up	109.397	8.45524	1.84679	-1.84679	Abca13	268379	0006200 // ATP catabolic process // inferred from electronic annotation///0006810 // transport // inferred from electronic annotation	0016020 // membrane // inferred from electronic annotation///0016021 // integral to membrane // inferred from electronic annotation	0000166 // nucleotide binding // inferred from electronic annotation///0005524 // ATP binding // inferred from electronic annotation///0016887 // ATPase activity // inferred from electronic annotation///0017111 // nucleoside-triphosphatase activity // inferred from electronic annotation	chr11:9684226-9684851 (+) // 97.76 // qA1		2013-10-23	This probe set was annotated using the Genome Consensus/Exemplar Overlap based pipeline to a Entrez Gene identifier using 2 transcripts. // false // Genome Consensus/Exemplar Overlap // C		ENSMUST00000042740,NM_178259	Mm.44160	chr11|11 A2	9684851	chr11	97.76	9684226	+		ENSMUSG00000004668		ATP-binding cassette, sub-family A (ABC1), member 13	Mouse Genome 430 2.0 Array	December 2011 (Mouse Genome Sequencing Consortium and NCBI 38)	GO:0006200|GO:0006810|GO:0016020|GO:0016021|GO:0000166|GO:0005524|GO:0016887|GO:0017111	IPR003439 // ABC transporter-like // 7.6E-23///IPR003439 // ABC transporter-like // 1.7E-16					NP_839990	NM_178259	BB503961		GenBank	Consensus sequence		Mus musculus	Q5SSE9	gb:BB503961 /DB_XREF=gi:16442673 /DB_XREF=BB503961 /CLONE=D630045O20 /FEA=EST /CNT=2 /TID=Mm.44160.1 /TIER=ConsEnd /STK=2 /UG=Mm.44160 /UG_TITLE=ESTs
1447410_at	19.057	4.25225	19.057	up	104.698	5.49397	2.12612	-2.12612						chr5:15477093-15477513 (+) // 58.95 // qA2		2013-10-23	This probe set was annotated using the Design Representative Id based pipeline to a GenBank identifier using 1 transcripts. // false // Design Representative Id // R		BB712583	Mm.210464		15477513	chr5	58.95	15477093	+					Mouse Genome 430 2.0 Array	December 2011 (Mouse Genome Sequencing Consortium and NCBI 38)									BB712583		GenBank	Consensus sequence		Mus musculus		gb:BB712583 /DB_XREF=gi:16065752 /DB_XREF=BB712583 /CLONE=B020035N03 /FEA=EST /CNT=2 /TID=Mm.210464.1 /TIER=ConsEnd /STK=2 /UG=Mm.210464 /UG_TITLE=ESTs
1453180_at	-25.8723	-4.69334	25.8723	down	11.2515	291.103	-2.34667	2.34667	Rnls	67795	0055114 // oxidation-reduction process // inferred from electronic annotation	0005576 // extracellular region // inferred from electronic annotation	0016491 // oxidoreductase activity // inferred from electronic annotation	chr19:33137743-33392265 (-) // 99.75 // qC1		2013-10-23	This probe set was annotated using the Matching Probes based pipeline to a Entrez Gene identifier using 5 transcripts. // false // Matching Probes // A	DQ788834 // gb // 8 // Cross Hyb Matching Probes///GENSCAN00000044834 // ensembl // 8 // Cross Hyb Matching Probes	BC052355(11),ENSMUST00000096114(11),ENSMUST00000163093(11),NM_001146342(11),NM_001167818(11)	Mm.55466	chr19 C1|19	33392265	chr19	99.75	33137743	-		ENSMUSG00000071573		renalase, FAD-dependent amine oxidase	Mouse Genome 430 2.0 Array	December 2011 (Mouse Genome Sequencing Consortium and NCBI 38)	GO:0055114|GO:0005576|GO:0016491	IPR002937 // Amine oxidase // 6.7E-9	1915045				NP_001139814///NP_001161290	NM_001146342///NM_001167818	AK018322		GenBank	Consensus sequence		Mus musculus	A7RDN6///E9Q243	gb:AK018322.1 /DB_XREF=gi:12857973 /FEA=mRNA /CNT=20 /TID=Mm.55466.1 /TIER=Stack /STK=16 /UG=Mm.55466 /LL=67795 /UG_GENE=6530404N21Rik /UG_TITLE=RIKEN cDNA 6530404N21 gene /DEF=Mus musculus 10 days neonate cerebellum cDNA, RIKEN full-length enriched library, clone:6530404N21:homolog to CDNA FLJ11218 FIS, CLONE PLACE1008095, full insert sequence.
1453275_at	12.9644	3.69648	12.9644	up	617.005	47.5923	1.84824	-1.84824	Dynap	75577	0008284 // positive regulation of cell proliferation // inferred from electronic annotation///0032148 // activation of protein kinase B activity // inferred from electronic annotation///0042981 // regulation of apoptotic process // inferred from electronic annotation///1901625 // cellular response to ergosterol // inferred from electronic annotation	0005794 // Golgi apparatus // inferred from electronic annotation///0005886 // plasma membrane // inferred from electronic annotation	0005515 // protein binding // inferred from electronic annotation	chr18:70240428-70244582 (-) // 97.44 // qE2		2013-10-23	This probe set was annotated using the Matching Probes based pipeline to a Entrez Gene identifier using 2 transcripts. // false // Matching Probes // A	GENSCAN00000009949 // ensembl // 1 // Cross Hyb Matching Probes	ENSMUST00000025390(11),NM_029346(11)	Mm.58214	chr18 E2|18 44.21 cM	70244582	chr18	97.44	70240428	-		ENSMUSG00000024512		dynactin associated protein	Mouse Genome 430 2.0 Array	December 2011 (Mouse Genome Sequencing Consortium and NCBI 38)	GO:0008284|GO:0032148|GO:0042981|GO:1901625|GO:0005794|GO:0005886|GO:0005515						NP_083622	NM_029346	AK009098		GenBank	Consensus sequence		Mus musculus	Q9D7M5///G8CXX7	gb:AK009098.1 /DB_XREF=gi:12843676 /FEA=mRNA /CNT=14 /TID=Mm.58214.1 /TIER=Stack /STK=9 /UG=Mm.58214 /LL=75577 /UG_GENE=2310002L13Rik /UG_TITLE=RIKEN cDNA 2310002L13 gene /DEF=Mus musculus adult male tongue cDNA, RIKEN full-length enriched library, clone:2310002L13:hypothetical protein, full insert sequence.
1455266_at	10.8484	3.43941	10.8484	up	177.969	16.4051	1.71971	-1.71971	Kif5c	16574	0006355 // regulation of transcription, DNA-dependent // inferred from electronic annotation///0006810 // transport // inferred from electronic annotation///0007018 // microtubule-based movement // inferred from electronic annotation///0007165 // signal transduction // inferred from electronic annotation///0008045 // motor neuron axon guidance // inferred from mutant phenotype///0008152 // metabo…	0005737 // cytoplasm // inferred from direct assay///0005856 // cytoskeleton // inferred from electronic annotation///0005871 // kinesin complex // inferred from sequence or structural similarity///0005871 // kinesin complex // traceable author statement///0005874 // microtubule // inferred from electronic annotation///0005875 // microtubule associated complex // inferred from electronic annotati…	0000166 // nucleotide binding // inferred from electronic annotation///0003700 // sequence-specific DNA binding transcription factor activity // inferred from electronic annotation///0003777 // microtubule motor activity // traceable author statement///0004871 // signal transducer activity // inferred from electronic annotation///0005515 // protein binding // inferred from physical interaction///…	chr2:49771791-49774776 (+) // 98.47 // qC1.1		2013-10-23	This probe set was annotated using the Matching Probes based pipeline to a Entrez Gene identifier using 4 transcripts. // false // Matching Probes // A		AK134577(11),BC067051(11),ENSMUST00000028102(11),NM_008449(11)	Mm.215064	chr2 C|2 28.68 cM	49774776	chr2	98.47	49771791	+		ENSMUSG00000026764		kinesin family member 5C	Mouse Genome 430 2.0 Array	December 2011 (Mouse Genome Sequencing Consortium and NCBI 38)	GO:0006355|GO:0006810|GO:0007018|GO:0007165|GO:0008045|GO:0008152|GO:0051028|GO:0005737|GO:0005856|GO:0005871|GO:0005871|GO:0005874|GO:0005875|GO:0035253|GO:0043005|GO:0000166|GO:0003700|GO:0003777|GO:0004871|GO:0005515|GO:0005524|GO:0008017|GO:0034190	IPR001752 // Kinesin, motor domain // 5.7E-115	1098269				NP_032475	NM_008449	BB698320		GenBank	Consensus sequence		Mus musculus	P28738///Q8CHF1///Q3TY51	gb:BB698320 /DB_XREF=gi:16047144 /DB_XREF=BB698320 /CLONE=7120499C09 /FEA=EST /CNT=41 /TID=Mm.215064.1 /TIER=Stack /STK=18 /UG=Mm.215064 /UG_TITLE=ESTs
1455409_at	11.183	3.48324	11.183	up	98.6013	8.81706	1.74162	-1.74162	Spire1	68166	0006810 // transport // inferred from electronic annotation///0015031 // protein transport // inferred from electronic annotation///0016192 // vesicle-mediated transport // inferred from mutant phenotype///0030036 // actin cytoskeleton organization // inferred from mutant phenotype///0030036 // actin cytoskeleton organization // not recorded///0036089 // cleavage furrow formation // inferred from…	0005737 // cytoplasm // inferred from electronic annotation///0005794 // Golgi apparatus // inferred from direct assay///0005829 // cytosol // inferred from electronic annotation///0005856 // cytoskeleton // inferred from electronic annotation///0005886 // plasma membrane // inferred from electronic annotation///0005938 // cell cortex // inferred from direct assay///0016020 // membrane // inferre…	0003779 // actin binding // inferred from electronic annotation	chr18:67488210-67489445 (-) // 91.35 // qE1		2013-10-23	This probe set was annotated using the Matching Probes based pipeline to a Entrez Gene identifier using 8 transcripts. // false // Matching Probes // A	n273391 // noncode // 3 // Cross Hyb Matching Probes///n278640 // noncode // 3 // Cross Hyb Matching Probes///AK044274 // gb // 3 // Cross Hyb Matching Probes///AK049885 // gb // 3 // Cross Hyb Matching Probes	AK020056(11),AK082780(10),BC094375(11),ENSMUST00000045105(11),ENSMUST00000082243(11),ENSMUST00000115050(11),NM_176832(11),NM_194355(11)	Mm.23853	chr18 E1|18	67489445	chr18	91.35	67488210	-		ENSMUSG00000024533		spire homolog 1 (Drosophila)	Mouse Genome 430 2.0 Array	December 2011 (Mouse Genome Sequencing Consortium and NCBI 38)	GO:0006810|GO:0015031|GO:0016192|GO:0030036|GO:0030036|GO:0036089|GO:0040038|GO:0046907|GO:0048193|GO:0051295|GO:0051295|GO:0070649|GO:0005737|GO:0005794|GO:0005829|GO:0005856|GO:0005886|GO:0005938|GO:0016020|GO:0030659|GO:0031410|GO:0032154|GO:0048471|GO:0003779		1915416				NP_789802///NP_919336	NM_176832///NM_194355	BM234794		GenBank	Consensus sequence		Mus musculus	Q52KF3///D3Z495///D3YTL8///Q6ZPX2	gb:BM234794 /DB_XREF=gi:17870052 /DB_XREF=K0406C10-3 /CLONE=K0406C10 /FEA=EST /CNT=34 /TID=Mm.23853.1 /TIER=Stack /STK=14 /UG=Mm.23853 /LL=107050 /UG_GENE=AW550622 /UG_TITLE=expressed sequence AW550622
1455595_at	-31.4944	-4.97702	31.4944	down	61.0265	1921.99	-2.48851	2.48851	Ugt2b36	231396	0005975 // carbohydrate metabolic process // inferred from electronic annotation///0008152 // metabolic process // inferred from electronic annotation///0030259 // lipid glycosylation // inferred from electronic annotation	0043231 // intracellular membrane-bounded organelle // not recorded	0015020 // glucuronosyltransferase activity // not recorded///0016740 // transferase activity // inferred from electronic annotation///0016757 // transferase activity, transferring glycosyl groups // inferred from electronic annotation///0016758 // transferase activity, transferring hexosyl groups // inferred from electronic annotation///0030246 // carbohydrate binding // inferred from electronic…	chr5:87065918-87081065 (-) // 98.29 // qE1		2013-10-23	This probe set was annotated using the Matching Probes based pipeline to a Entrez Gene identifier using 6 transcripts. // false // Matching Probes // A	GENSCAN00000019364 // ensembl // 6 // Cross Hyb Matching Probes	AK149425(11),AK149596(9),BC141232(11),BC145555(10),ENSMUST00000094649(11),NM_001029867(11)	Mm.27329	chr5 E1|5	87081065	chr5	98.29	87065918	-	EC:2.4.1.17	ENSMUSG00000070704		UDP glucuronosyltransferase 2 family, polypeptide B36	Mouse Genome 430 2.0 Array	December 2011 (Mouse Genome Sequencing Consortium and NCBI 38)	GO:0005975|GO:0008152|GO:0030259|GO:0043231|GO:0015020|GO:0016740|GO:0016757|GO:0016758|GO:0030246	IPR002213 // UDP-glucuronosyl/UDP-glucosyltransferase // 6.9E-258///IPR007235 // Glycosyl transferase, family 28, C-terminal // 3.0E-10	3576103				NP_001025038	NM_001029867	AW111403		GenBank	Consensus sequence		Mus musculus	Q3UEP4///Q3UEC9///B9EIY3///B7ZP03///D3YXD5	gb:AW111403 /DB_XREF=gi:6824116 /DB_XREF=MT5501 /CLONE=MT5501 /FEA=EST /CNT=20 /TID=Mm.27329.1 /TIER=Stack /STK=10 /UG=Mm.27329 /UG_TITLE=ESTs, Moderately similar to UDB5 MOUSE UDP-GLUCURONOSYLTRANSFERASE 2B5 PRECURSOR, MICROSOMAL (M.musculus)
1456035_at	-16.6588	-4.05821	16.6588	down	10.5506	175.76	-2.02911	2.02911	Nxf3	245610	0006406 // mRNA export from nucleus // not recorded///0006810 // transport // inferred from electronic annotation///0016973 // poly(A)+ mRNA export from nucleus // inferred from physical interaction///0051028 // mRNA transport // inferred from electronic annotation	0005622 // intracellular // inferred from electronic annotation///0005634 // nucleus // not recorded///0005737 // cytoplasm // inferred from direct assay///0005737 // cytoplasm // not recorded///0042272 // nuclear RNA export factor complex // not recorded	0000166 // nucleotide binding // inferred from electronic annotation///0003723 // RNA binding // inferred from electronic annotation///0003729 // mRNA binding // inferred from direct assay///0005515 // protein binding // inferred from physical interaction	chrX:136072107-136072693 (-) // 91.0 // qF1		2013-10-23	This probe set was annotated using the Matching Probes based pipeline to a Entrez Gene identifier using 3 transcripts. // false // Matching Probes // A		AB178899(10),ENSMUST00000080929(11),NM_001024141(11)	Mm.84512	chrX F1|X 57.38 cM	136072693	chrX	91	136072107	-		ENSMUSG00000057000		nuclear RNA export factor 3	Mouse Genome 430 2.0 Array	December 2011 (Mouse Genome Sequencing Consortium and NCBI 38)	GO:0006406|GO:0006810|GO:0016973|GO:0051028|GO:0005622|GO:0005634|GO:0005737|GO:0005737|GO:0042272|GO:0000166|GO:0003723|GO:0003729|GO:0005515	IPR002075 // Nuclear transport factor 2 // 5.6E-19///IPR005637 // TAP C-terminal (TAP-C) domain // 1.3E-13///IPR015245 // Nuclear RNA export factor Tap, RNA-binding domain // 4.8E-43	2685230				NP_001019312	NM_001024141	BM236468		GenBank	Consensus sequence		Mus musculus	Q4ZGD9///B1AUS0	gb:BM236468 /DB_XREF=gi:17871738 /DB_XREF=K0435H05-3 /CLONE=K0435H05 /FEA=EST /CNT=19 /TID=Mm.84512.1 /TIER=Stack /STK=19 /UG=Mm.84512 /UG_TITLE=ESTs
1456862_at	11.1106	3.47387	11.1106	up	93.802	8.44256	1.73693	-1.73693	Six4	20474	0006355 // regulation of transcription, DNA-dependent // inferred from electronic annotation///0007275 // multicellular organismal development // inferred from electronic annotation///0007519 // skeletal muscle tissue development // inferred from genetic interaction///0008582 // regulation of synaptic growth at neuromuscular junction // inferred from genetic interaction///0010468 // regulation of…	0005634 // nucleus // inferred by curator///0005634 // nucleus // inferred from direct assay///0005737 // cytoplasm // inferred from electronic annotation	0003677 // DNA binding // inferred from direct assay///0003700 // sequence-specific DNA binding transcription factor activity // inferred from direct assay///0005515 // protein binding // inferred from physical interaction///0043565 // sequence-specific DNA binding // inferred from direct assay	chr12:73099608-73100029 (-) // 98.13 // qC3		2013-10-23	This probe set was annotated using the Matching Probes based pipeline to a Entrez Gene identifier using 1 transcripts. // false // Matching Probes // A		ENSMUST00000043208(11)	Mm.99555	chr12 C3|12	73100029	chr12	98.13	73099608	-		ENSMUSG00000034460		sine oculis-related homeobox 4	Mouse Genome 430 2.0 Array	December 2011 (Mouse Genome Sequencing Consortium and NCBI 38)	GO:0006355|GO:0007275|GO:0007519|GO:0008582|GO:0010468|GO:0032880|GO:0042472|GO:0043524|GO:0045893|GO:0045893|GO:0045944|GO:0048538|GO:0048699|GO:0048701|GO:0048704|GO:0048856|GO:0051451|GO:0072075|GO:0072095|GO:0072107|GO:0090190|GO:0005634|GO:0005634|GO:0005737|GO:0003677|GO:0003700|GO:0005515|GO:0043565	IPR001356 // Homeodomain // 5.5E-18					NP_035512	NM_011382	AI893638		GenBank	Consensus sequence		Mus musculus	Q61321	gb:AI893638 /DB_XREF=gi:5599540 /DB_XREF=mn04a03.x1 /CLONE=IMAGE:536908 /FEA=EST /CNT=7 /TID=Mm.99555.1 /TIER=ConsEnd /STK=7 /UG=Mm.99555 /UG_TITLE=ESTs
1457273_at	182.182	7.50924	182.182	up	1720.69	9.44488	3.75462	-3.75462	Tenm2	23964	0000122 // negative regulation of transcription from RNA polymerase II promoter // inferred from sequence or structural similarity///0006351 // transcription, DNA-dependent // inferred from electronic annotation///0006355 // regulation of transcription, DNA-dependent // inferred from electronic annotation///0007155 // cell adhesion // inferred from electronic annotation///0007157 // heterophilic …	0005634 // nucleus // inferred from electronic annotation///0005783 // endoplasmic reticulum // inferred from electronic annotation///0005794 // Golgi apparatus // inferred from electronic annotation///0005886 // plasma membrane // not recorded///0005887 // integral to plasma membrane // inferred from sequence or structural similarity///0005911 // cell-cell junction // not recorded///0016020 // m…	0005102 // receptor binding // not recorded///0005515 // protein binding // inferred from electronic annotation///0042803 // protein homodimerization activity // inferred from direct assay///0046982 // protein heterodimerization activity // inferred from direct assay///0050839 // cell adhesion molecule binding // not recorded	chr11:36006655-36007480 (-) // 94.3 // qA4		2013-10-23	This probe set was annotated using the Matching Probes based pipeline to a Entrez Gene identifier using 3 transcripts. // false // Matching Probes // A		AK149173(11),ENSMUST00000102801(11),NM_011856(11)	Mm.82679	chr11 A4|11 21.96 cM	36007480	chr11	94.3	36006655	-		ENSMUSG00000049336		teneurin transmembrane protein 2	Mouse Genome 430 2.0 Array	December 2011 (Mouse Genome Sequencing Consortium and NCBI 38)	GO:0000122|GO:0006351|GO:0006355|GO:0007155|GO:0007157|GO:0007165|GO:0007411|GO:0016337|GO:0035584|GO:0051491|GO:0005634|GO:0005783|GO:0005794|GO:0005886|GO:0005887|GO:0005911|GO:0016020|GO:0016021|GO:0016605|GO:0016605|GO:0030054|GO:0030175|GO:0030175|GO:0030425|GO:0030426|GO:0030426|GO:0042995|GO:0043005|GO:0043197|GO:0045202|GO:0045211|GO:0005102|GO:0005515|GO:0042803|GO:0046982|GO:0050839	IPR009471 // Teneurin intracellular, N-terminal // 3.9E-186///IPR013111 // EGF, extracellular // 4.2E-7///IPR013111 // EGF, extracellular // 2.2E-6///IPR013111 // EGF, extracellular // 6.7E-6///IPR013111 // EGF, extracellular // 1.4E-5///IPR013111 // EGF, extracellular // 5.1E-6///IPR013111 // EGF, extracellular // 7.4E-6	1345184				NP_035986	NM_011856	BM899576		GenBank	Consensus sequence		Mus musculus	Q9WTS5///B9EJ72	gb:BM899576 /DB_XREF=gi:19382364 /DB_XREF=UI-M-DJ1-buc-h-08-0-UI.s1 /CLONE=UI-M-DJ1-buc-h-08-0-UI /FEA=EST /CNT=12 /TID=Mm.82679.1 /TIER=ConsEnd /STK=4 /UG=Mm.82679 /UG_TITLE=ESTs
1458871_at	11.0104	3.4608	11.0104	up	739.096	67.127	1.7304	-1.7304	Tmprss11e	243084	0006508 // proteolysis // inferred from direct assay	0005576 // extracellular region // inferred from electronic annotation///0005886 // plasma membrane // inferred from direct assay///0005887 // integral to plasma membrane // inferred from direct assay///0016020 // membrane // inferred from electronic annotation///0016021 // integral to membrane // inferred from electronic annotation	0003824 // catalytic activity // inferred from electronic annotation///0004252 // serine-type endopeptidase activity // inferred from electronic annotation///0005515 // protein binding // inferred from physical interaction///0008233 // peptidase activity // inferred from electronic annotation///0008236 // serine-type peptidase activity // inferred from direct assay///0016787 // hydrolase activity…	chr5:86705185-86705920 (-) // 42.86 // qE1		2013-10-23	This probe set was annotated using the Matching Probes based pipeline to a Entrez Gene identifier using 3 transcripts. // false // Matching Probes // A		AK037235(11),ENSMUST00000161306(11),NM_172880(11)	Mm.130801	chr5 E1|5	86705920	chr5	42.86	86705185	-	EC:3.4.21.-	ENSMUSG00000054537		transmembrane protease, serine 11e	Mouse Genome 430 2.0 Array	December 2011 (Mouse Genome Sequencing Consortium and NCBI 38)	GO:0006508|GO:0005576|GO:0005886|GO:0005887|GO:0016020|GO:0016021|GO:0003824|GO:0004252|GO:0005515|GO:0008233|GO:0008236|GO:0016787	IPR000082 // SEA domain // 2.2E-20///IPR001254 // Peptidase S1 // 6.9E-70	3513175				NP_766468	NM_172880	BB148290		GenBank	Consensus sequence		Mus musculus	Q5S248	gb:BB148290 /DB_XREF=gi:8803227 /DB_XREF=BB148290 /CLONE=9930108A01 /FEA=EST /CNT=3 /TID=Mm.130801.1 /TIER=ConsEnd /STK=2 /UG=Mm.130801 /UG_TITLE=ESTs
1460431_at	66.328	6.05155	66.328	up	610.192	9.19962	3.02577	-3.02577	Gcnt1	14537	0006486 // protein glycosylation // inferred from electronic annotation///0032868 // response to insulin stimulus // inferred from electronic annotation///0048729 // tissue morphogenesis // inferred from genetic interaction///0060993 // kidney morphogenesis // inferred from genetic interaction	0000139 // Golgi membrane // inferred from electronic annotation///0005615 // extracellular space // not recorded///0005794 // Golgi apparatus // inferred from electronic annotation///0016020 // membrane // inferred from electronic annotation///0016021 // integral to membrane // inferred from electronic annotation	0003829 // beta-1,3-galactosyl-O-glycosyl-glycoprotein beta-1,6-N-acetylglucosaminyltransferase activity // not recorded///0008375 // acetylglucosaminyltransferase activity // inferred from electronic annotation///0016740 // transferase activity // inferred from electronic annotation///0016757 // transferase activity, transferring glycosyl groups // inferred from electronic annotation	chr19:17326140-17327831 (-) // 93.51 // qB		2013-10-23	This probe set was annotated using the Matching Probes based pipeline to a Entrez Gene identifier using 8 transcripts. // false // Matching Probes // A	BC026950 // gb // 1 // Cross Hyb Matching Probes///BC039126 // gb // 7 // Cross Hyb Matching Probes	AK017462(11),AK045216(10),ENSMUST00000067276(11),ENSMUST00000169897(11),ENSMUST00000174236(11),NM_001136484(11),NM_010265(11),NM_173442(11)	Mm.40617	chr19 B|19 12.75 cM	17327831	chr19	93.51	17326140	-	EC:2.4.1.102	ENSMUSG00000038843		glucosaminyl (N-acetyl) transferase 1, core 2	Mouse Genome 430 2.0 Array	December 2011 (Mouse Genome Sequencing Consortium and NCBI 38)	GO:0006486|GO:0032868|GO:0048729|GO:0060993|GO:0000139|GO:0005615|GO:0005794|GO:0016020|GO:0016021|GO:0003829|GO:0008375|GO:0016740|GO:0016757	IPR003406 // Glycosyl transferase, family 14 // 1.1E-65///IPR003406 // Glycosyl transferase, family 14 // 1.0E-65	95676				NP_001129956///NP_034395///NP_775618	NM_001136484///NM_010265///NM_173442	AK017462		GenBank	Consensus sequence		Mus musculus	Q09324///G3UY40///Q5D0D8	gb:AK017462.1 /DB_XREF=gi:12856708 /FEA=mRNA /CNT=115 /TID=Mm.40617.1 /TIER=Stack /STK=93 /UG=Mm.40617 /LL=71444 /UG_GENE=5630400D21Rik /UG_TITLE=RIKEN cDNA 5630400D21 gene /DEF=Mus musculus 6 days embryo whole body cDNA, RIKEN full-length enriched library, clone:5630400D21:unclassifiable transcript, full insert sequence.
Fold change ≥10.0. #Entity List : Filtered on Expression (20.0 - 100.0)th Percentile in the Raw Data. #Interpretation : Normal vs meta. #Experiment : lung_metastasis. #Fold-Change cut-off : 10.0. #Pairing option : All against single condition. #Condition pairs :#[Meta] vs [Normal]. #Minimum number of pairs:1 out of 1 condition pairs. # Technology : Affymetrix.GeneChip.Mouse430_2. # Owner : gxuser…
[truncated: 6 more columns]
